# Supplementary material for: Modulation of Plant and Fungal Gene Expression Upon Cd Exposure and Symbiosis in Ericoid Mycorrhizal Vaccinium myrtillus
Source: Front Microbiol. 2020 Mar 9;11:341. doi: 10.3389/fmicb.2020.00341 (PMC7075258; doi:10.3389/fmicb.2020.00341)
Supplement: Supplementary file 4 [file Data_Sheet_4.xlsx]

## Sheet: O. maius p<0.05 FC>2 FC<0.5
Table S5. List of O. maius Zn putative transporters
Feature ID	protein ID	FLM Cd vs FLM UP	FLM Cd vs FLM DOWN	MYC Cd vs MYC UP	MYC Cd vs MYC DOWN	MYC vs FLM UP	MYC vs FLM DOWN	MYC Cd vs FLM Cd UP	MYC Cd vs FLM Cd DOWN	FLM Cd vs FLM	Baggerley's test: FLM Cd vs FLM original values - FDR p-value correction	MYC vs FLM	Baggerley's test: MYC vs FLM original values - FDR p-value correction	MYC Cd vs FLM Cd	Baggerley's test: MYC Cd vs FLM Cd original values - FDR p-value correction	MYC Cd vs MYC	Baggerley's test: MYC Cd vs MYC original values - FDR p-value correction	FLM - Means	FLM Cd - Means	MYC - Means	MYC Cd - Means	Protein length	Interpro Description	seqid	seqid	score	blast score	hmm score	tc family	family size	family tms	family tms dev	protein tms	family name	protein full name	nearest protein	subfamily	coincide	domain acc	domain evalue	domain desc	TCDB protein length	Alignment length	TCDB score	TCDB e-value	TCDB percent identity	near swiss protein	swiss score	swiss evalue
jgi|Oidma1|16220|	16145								MYC Cd vs FLM Cd DOWN	1.35683	0.314006	0.572247	7.80749e-11	0.44975	1.0897e-18	1.06638	0.977638	62.9372	85.3949	36.0156	38.4064	98	Zinc finger, Tim10/DDP-type						3.A.8					The Mitochondrial Protein Translocase (MPT) Family		gnl|TC-DB|P53299	3.A.8.1.1					105	68	168	3e-17	42.6	sp|Q4X0V2|TIM13_ASPFU	287	1e-33
jgi|Oidma1|16973|	16898						MYC vs FLM DOWN		MYC Cd vs FLM Cd DOWN	1.43946	0.0092301	0.403084	1.68947e-19	0.428162	2.45166e-11	1.52901	0.624768	259.417	373.419	104.567	159.884	62	Cytochrome c oxidase, subunit VIIa, fungal						3.D.4					The Proton-translocating Cytochrome Oxidase (COX) Superfamily		gnl|TC-DB|P07255	3.D.4.8.1					59	58	138	1e-13	37.9	sp|Q6BPV1|COX9_DEBHA	150	6e-14
jgi|Oidma1|17076|	17001						MYC vs FLM DOWN		MYC Cd vs FLM Cd DOWN	1.11345	1	0.484761	0.0446211	0.483213	2.85755e-35	1.1099	0.897811	176.279	196.279	85.4533	94.8445	120	Vacuolar (H+)-ATPase G subunit ; Vacuolar (H+)-ATPase G subunit						3.A.2					The H+- or Na+-translocating F-type, V-type and A-type ATPase (F-ATPase) Superfamily		gnl|TC-DB|P48836	3.A.2.2.3					114	102	158	4e-15	44.1	sp|P78713|VATG_NEUCR	333	3e-40
jgi|Oidma1|17185|	17110								MYC Cd vs FLM Cd DOWN	1.70324	0.00518169	0.61161	4.32764e-06	0.496029	2.01832e-15	1.38136	0.133385	49.6629	84.5878	30.3744	41.958	107	Protein Transporter, Pam16/TIM14 ; Heat shock protein DnaJ, N-terminal ; Heat shock protein DnaJ, N-terminal ; Heat shock protein DnaJ, N-terminal						3.A.8					The Mitochondrial Protein Translocase (MPT) Family		gnl|TC-DB|Q07914	3.A.8.1.1					168	68	244	1e-27	60.3	sp|Q5B4H1|TIM14_EMENI	405	1e-51
jgi|Oidma1|17600|	17525						MYC vs FLM DOWN		MYC Cd vs FLM Cd DOWN	1.15744	1	0.476365	1.09867e-15	0.400042	1.40106e-44	0.971995	0.930642	154.812	179.185	73.7469	71.6816	178	Protein of unknown function UPF0041						2.A.105					The Mitochondrial Pyruvate Carrier (MPC) Family		gnl|TC-DB|C4JL76	2.A.105.1.12					189	187	406	7e-51	47.1	sp|Q09896|MPC1_SCHPO	319	4e-37
jgi|Oidma1|17633|	17558						MYC vs FLM DOWN		MYC Cd vs FLM Cd DOWN	1.37369	0.326602	0.427189	2.31805e-14	0.335602	7.57378e-22	1.07918	0.872754	54.7858	75.2586	23.4039	25.2569	229	Pyridoxamine 5'-phosphate oxidase ; Pyridoxamine 5'-phosphate oxidase-related, FMN-binding core ; Pyridoxamine 5'-phosphate oxidase ; Pyridoxamine 5'-phosphate oxidase ; FMN-binding split barrel, related						2.A.7					The Drug/Metabolite Transporter (DMT) Superfamily		gnl|TC-DB|K9FTF6	2.A.7.2.4					509	264	470	3e-56	42.8	sp|P38075|PDX3_YEAST	625	3e-81
jgi|Oidma1|17720|	17645						MYC vs FLM DOWN		MYC Cd vs FLM Cd DOWN	1.08104	1	0.496564	1.80632e-37	0.498334	9.58602e-10	1.0849	0.90334	174.225	188.344	86.5137	93.8584	78	Ubiquitin ; Ubiquitin ; Ubiquitin ; Ubiquitin ; Ubiquitin						3.A.16					The Endoplasmic Reticular Retrotranslocon (ER-RT) Family		gnl|TC-DB|Q7KQK2	3.A.16.1.3					381	77	226	5e-24	55.8	sp|Q93725|NEDD8_CAEEL	307	2e-37
jgi|Oidma1|17723|	17648						MYC vs FLM DOWN			0.563728	0.0739825	0.387594	1.99324e-05	0.608734	0.00144642	0.88536	0.835697	55.3741	31.2159	21.4627	19.0022	278	Mg2+ transporter protein, CorA-like	Oidma1_17648	17648	3e-55	3e-55	-1	1.A.35.	7	2.14	0.35	1	The CorA Metal Ion Transporter (MIT) Family	>Oidma1_17648	gnl|TC-DB|P35724	1.A.35.2.2	40	PF01544;	4e-030;	CorA CorA-like Mg2;						sp|P35724|MNR2_YEAST		1e-53
jgi|Oidma1|18055|	17980								MYC Cd vs FLM Cd DOWN	1.74588	0.00278193	0.626168	2.62209e-05	0.458388	1.38287e-18	1.27807	0.461101	52.2451	91.2136	32.7143	41.8112	90	Zinc finger, Tim10/DDP-type						3.A.8					The Mitochondrial Protein Translocase (MPT) Family		gnl|TC-DB|O74700	3.A.8.1.1					87	81	245	4e-29	55.6	sp|Q9Y8A7|TIM9_EMENI	309	2e-37
jgi|Oidma1|18205|	18130								MYC Cd vs FLM Cd DOWN	1.39792	0.246018	0.661737	7.52654e-07	0.430537	1.25965e-25	0.909511	0.802134	80.0606	111.919	52.979	48.185	159	Ctr copper transporter	Oidma1_18130	18130	4.6e-50	4.6e-50	-1	1.A.56.	13	2.62	0.49	2	The Copper Transporter (Ctr) Family	>Oidma1_18130	gnl|TC-DB|ABO38808	1.A.56.1.10	100	PF04145;	8e-034;	Ctr Ctr copper transporter family;						sp|P38865|CTR2_YEAST		3e-09
jgi|Oidma1|18417|	18342						MYC vs FLM DOWN			0.974653	0.636208	0.433909	1.83658e-34	0.528261	2.81823e-19	1.18659	0.327293	153.751	149.854	66.7139	79.1618	225	Vesicle transport v-SNARE ; Target SNARE coiled-coil region						1.F.1					The Synaptosomal Vesicle Fusion Pore (SVF-Pore) Family		gnl|TC-DB|Q04338	1.F.1.1.2					217	222	255	3e-27	36.5	sp|P78768|VTI1_SCHPO	370	5e-43
jgi|Oidma1|18634|	18559						MYC vs FLM DOWN		MYC Cd vs FLM Cd DOWN	1.2604	0.933158	0.482373	3.96544e-06	0.489991	5.10226e-18	1.2803	0.27041	77.398	97.5522	37.3347	47.7997	130	Outer membrane protein, MIM1/TOM13, mitochondrial						1.B.33					The Outer Membrane Protein Insertion Porin (Bam Complex) (OmpIP) Family		gnl|TC-DB|Q08176	1.B.33.3.1					113	77	160	2e-15	44.2	sp|Q8X0G8|MIM1_NEUCR	354	5e-43
jgi|Oidma1|18644|	18569						MYC vs FLM DOWN			1.05412	1	0.470936	1.51906e-06	0.587138	9.18271e-18	1.31422	0.808639	126.792	133.654	59.7109	78.4732	167	Ubiquitin-conjugating enzyme, E2 ; Ubiquitin-conjugating enzyme, E2 ; Ubiquitin-conjugating enzyme, E2 ; Ubiquitin-conjugating enzyme, E2 ; Ubiquitin-conjugating enzyme, E2 ; Ubiquitin-conjugating enzyme/RWD-like						3.A.16					The Endoplasmic Reticular Retrotranslocon (ER-RT) Family		gnl|TC-DB|C8ZEM9	3.A.16.1.2					165	164	534	1e-70	58.5	sp|O00102|UBC7_SCHPO	618	4e-82
jgi|Oidma1|18742|	18667						MYC vs FLM DOWN		MYC Cd vs FLM Cd DOWN	0.887744	0.885025	0.325833	1.37595e-05	0.490866	1.96543e-09	1.33738	0.788017	239.835	212.912	78.1461	104.511	345	Tetratricopeptide TPR-1 ; Tetratricopeptide region ; Tetratricopeptide region ; Tetratricopeptide region						3.A.21					The C-terminal Tail-Anchored Membrane Protein Biogenesis/ Insertion Complex (TAMP-B) Family		gnl|TC-DB|Q12118	3.A.21.1.1					346	346	478	2e-57	36.4	sp|O13797|SGT2_SCHPO	567	2e-69
jgi|Oidma1|18770|	18695								MYC Cd vs FLM Cd DOWN	1.48521	0.00396724	0.536042	2.76058e-09	0.396449	6.14775e-15	1.09844	0.937084	116.72	173.354	62.5668	68.726	155	Mago nashi protein ; Mago nashi protein ; Protein kinase ATP binding, conserved site ; Mago nashi protein						3.A.18					The Nuclear mRNA Exporter (mRNA-E) Family		gnl|TC-DB|P61326	3.A.18.1.1					146	147	516	1e-68	68.0	sp|O43037|MGN_SCHPO	529	4e-69
jgi|Oidma1|18911|	18836								MYC Cd vs FLM Cd DOWN	1.35054	0.754707	0.550898	0.000189923	0.40847	6.35476e-10	1.00137	0.982133	51.058	68.9559	28.1278	28.1664	140	Protein Transporter, Pam16/TIM14 ; Protein Transporter, Pam16 ; Heat shock protein DnaJ, N-terminal						3.A.8					The Mitochondrial Protein Translocase (MPT) Family		gnl|TC-DB|P42949	3.A.8.1.1					149	133	288	4e-34	45.9	sp|Q5B187|TIM16_EMENI	512	6e-67
jgi|Oidma1|19104|	19029								MYC Cd vs FLM Cd DOWN	1.8349	0.000671949	0.617005	0.000109321	0.409428	9.45803e-14	1.21759	0.799517	74.4723	136.649	45.9498	55.9481	111	Signal recognition particle, SRP14 subunit ; Signal recognition particle, SRP14 subunit ; Signal recognition particle, SRP9/SRP14 subunit						3.A.5					The General Secretory Pathway (Sec) Family		gnl|TC-DB|P37108	3.A.5.9.1					136	112	95	9e-06	31.2	sp|Q9P372|SRP14_SCHPO	134	2e-10
jgi|Oidma1|19119|	19044								MYC Cd vs FLM Cd DOWN	1.4962	0.00658275	0.543208	8.417e-16	0.440699	5.61928e-28	1.21385	0.381163	87.86	131.456	47.7263	57.9325	100	Complex 1 LYR protein						3.D.1					The H+ or Na+-translocating NADH Dehydrogenase (NDH) Family		gnl|TC-DB|Q875B9	3.D.1.6.2					154	84	359	2e-45	82.1	sp|Q945M1|NDUB9_ARATH	187	2e-18
jgi|Oidma1|19140|	19065								MYC Cd vs FLM Cd DOWN	0.957916	1	0.506722	9.7672e-05	0.455203	8.83029e-07	0.860524	0.897907	31.8524	30.5119	16.1403	13.8891	198							1.I.1					The Eukaryotic Nuclear Pore Complex (E-NPC) Family		gnl|TC-DB|G0S2G1	1.I.1.1.2					299	166	389	1e-46	48.2	No hits found	-	-
jgi|Oidma1|19161|	19086						MYC vs FLM DOWN		MYC Cd vs FLM Cd DOWN	1.4229	0.922272	0.481713	0.049212	0.351507	1.53396e-15	1.0383	0.988716	64.4813	91.7504	31.0615	32.251	150	Ankyrin ; Ankyrin ; Ankyrin ; Ankyrin ; Ankyrin ; Ankyrin						1.A.1					The Voltage-gated Ion Channel (VIC) Superfamily		gnl|TC-DB|A5PH36	1.A.1.4.10					944	80	126	4e-09	33.8	sp|Q9HYV6|Y3287_PSEAE	264	1e-28
jgi|Oidma1|19248|	19173						MYC vs FLM DOWN			0.886774	0.584996	0.440219	1.93611e-06	0.673414	0.000875468	1.35652	0.788553	189.971	168.461	83.6287	113.444	168	Ubiquitin-conjugating enzyme, E2 ; Ubiquitin-conjugating enzyme, E2 ; Ubiquitin-conjugating enzyme, E2 ; Ubiquitin-conjugating enzyme, E2 ; Ubiquitin-conjugating enzyme, E2 ; Ubiquitin-conjugating enzyme/RWD-like						3.A.16					The Endoplasmic Reticular Retrotranslocon (ER-RT) Family		gnl|TC-DB|E7Q288	3.A.16.1.2					215	137	234	8e-25	32.1	sp|Q9P7R4|UBC8_SCHPO	611	8e-81
jgi|Oidma1|19270|	19195						MYC vs FLM DOWN		MYC Cd vs FLM Cd DOWN	1.24309	0.82326	0.410326	3.35671e-14	0.423187	2.52352e-12	1.28205	0.788553	82.5201	102.58	33.8601	43.4105	163	Peptidyl-prolyl cis-trans isomerase, cyclophilin-type ; Peptidyl-prolyl cis-trans isomerase, cyclophilin-type ; Peptidyl-prolyl cis-trans isomerase, cyclophilin-type ; Peptidyl-prolyl cis-trans isomerase, cyclophilin-type ; Cyclophilin-like						3.D.1					The H+ or Na+-translocating NADH Dehydrogenase (NDH) Family		gnl|TC-DB|F4K2G0	3.D.1.8.1					255	147	290	7e-33	43.5	sp|Q4IPB8|PPIL3_GIBZE	679	2e-91
jgi|Oidma1|19636|	19561						MYC vs FLM DOWN			0.902435	0.691842	0.282307	1.50277e-11	0.513936	4.14769e-15	1.64287	0.0412338	92.0724	83.0893	25.9927	42.7026	361	Protein of unknown function DUF250	Oidma1_19561	19561	2e-06	2e-06	-1	2.A.7.	74	8.31	2.38	6	The Drug/Metabolite Transporter (DMT) Superfamily	>Oidma1_19561	gnl|TC-DB|P93642	2.A.7.9.3	20	PF03151;	1e-027;	TPT Triose-phosphate Transporter family;						sp|Q94B38|GPT2_ARATH		6e-08
jgi|Oidma1|19742|	19667						MYC vs FLM DOWN		MYC Cd vs FLM Cd DOWN	1.43129	1	0.410858	0.0203531	0.178319	0.00688949	0.621204	0.419283	34.0898	48.7926	14.0061	8.70063	173	Mitochondrial import inner membrane translocase, subunit Tim17/22						3.A.8					The Mitochondrial Protein Translocase (MPT) Family		gnl|TC-DB|Q12328	3.A.8.1.1					207	167	365	2e-44	52.1	sp|Q9C1E8|TIM22_NEUCR	485	2e-61
jgi|Oidma1|19819|	19744						MYC vs FLM DOWN			0.89369	0.67575	0.443163	2.53218e-10	0.653987	8.87208e-05	1.31884	0.629376	40.0067	35.7536	17.7295	23.3824	228	Protein of unknown function DUF572						2.A.1					The Major Facilitator Superfamily (MFS)		gnl|TC-DB|Q010B9	2.A.1.82.2					825	246	315	3e-33	38.2	sp|Q9P7C5|CWF16_SCHPO	392	2e-45
jgi|Oidma1|20459|	20384						MYC vs FLM DOWN			0.728212	0.235843	0.476121	0.000234297	0.61124	7.84792e-07	0.934871	0.91423	159.296	116.001	75.8444	70.9047	212	B-cell receptor-associated 31-like						3.A.5					The General Secretory Pathway (Sec) Family		gnl|TC-DB|C8Z4J7	3.A.5.8.1					203	202	305	6e-35	34.7	sp|O14290|YF14_SCHPO	330	2e-37
jgi|Oidma1|20834|	20759						MYC vs FLM DOWN		MYC Cd vs FLM Cd DOWN	1.20188	0.902174	0.429544	3.29166e-18	0.397916	6.29375e-52	1.11338	0.593348	179.693	215.969	77.186	85.9373	150	Mitochondrial import translocase, subunit Tom22 ; Mitochondrial import translocase, subunit Tom22						3.A.8					The Mitochondrial Protein Translocase (MPT) Family		gnl|TC-DB|P49334	3.A.8.1.1					152	89	163	4e-15	42.7	sp|Q07335|TOM22_NEUCR	295	2e-33
jgi|Oidma1|55411|	55336					MYC vs FLM UP				0.314642	1	29.6865	0.0396018	32.6947	0.241943	0.346525	0.643155	0.0733386	0.0230754	2.17717	0.754443	1404	ABC transporter-like ; ABC transporter-like ; ABC transporter, transmembrane region ; AAA+ ATPase, core ; ABC transporter-like ; ABC transporter, transmembrane region, type 1 ; ABC transporter-like ; ABC transporter, transmembrane region, type 1	Oidma1_55336	55336	4.4e-46	4.4e-46	-1	3.A.1.	876	4.31	3.92	5	The ATP-binding Cassette (ABC) Superfamily	>Oidma1_55336	gnl|TC-DB|Q09428	3.A.1.208.4	100	PF00005; PF00005; PF00005; PF00664;	2e-081; 3e-035; 5e-047; 1e-017;	ABC_tran ABC transporter; ABC_tran ABC transporter; ABC_tran ABC transporter; ABC_membrane ABC transporter transmembrane region;						sp|Q63120|MRP2_RAT		1e-44
jgi|Oidma1|20954|	20879								MYC Cd vs FLM Cd DOWN	1.61584	0.000112365	0.657081	6.31892e-09	0.454019	6.47419e-11	1.11649	0.888211	160.6	259.504	105.527	117.82	53	Mitochondrial import translocase, subunit Tom7						3.A.8					The Mitochondrial Protein Translocase (MPT) Family		gnl|TC-DB|P53507	3.A.8.1.1					60	49	146	4e-15	49.0	sp|P53507|TOM7_YEAST	146	1e-13
jgi|Oidma1|21309|	21234								MYC Cd vs FLM Cd DOWN	1.65491	3.41254e-05	0.62241	0.000200296	0.398116	3.35895e-17	1.05854	0.970986	137.528	227.597	85.599	90.61	124	Complex 1 LYR protein ; NADH dehydrogenase [ubiquinone] (complex I), alpha subcomplex, subunit 6						3.D.1					The H+ or Na+-translocating NADH Dehydrogenase (NDH) Family		gnl|TC-DB|P42114	3.D.1.6.2					124	124	385	2e-49	54.8	sp|P42114|NDUA6_NEUCR	385	5e-48
jgi|Oidma1|119952|	119877					MYC vs FLM UP		MYC Cd vs FLM Cd UP		0.859988	1	55.9513	4.11536e-11	46.3838	3.41188e-08	0.712932	0.553516	0.319212	0.274519	17.8603	12.7332	641	ABC transporter-like ; ABC transporter-like ; ABC-2 type transporter ; AAA+ ATPase, core ; ABC transporter-like	Oidma1_119877	119877	2.7e-53	2.7e-53	-1	3.A.1.	876	4.31	3.92	1	The ATP-binding Cassette (ABC) Superfamily	>Oidma1_119877	gnl|TC-DB|P10090	3.A.1.204.1	100	PF00005; PF01061;	4e-041; 1e-034;	ABC_tran ABC transporter; ABC2_membrane ABC-2 type transporter;						sp|Q8RXN0|WBC11_ARATH		2e-67
jgi|Oidma1|22166|	22091						MYC vs FLM DOWN		MYC Cd vs FLM Cd DOWN	1.15399	1	0.283414	0.0254363	0.14377	3.84443e-06	0.585394	0.794017	12.3145	14.2107	3.49009	2.04308	1432	ABC transporter-like ; ABC transporter-like ; ABC-2 type transporter ; CDR ABC transporter ; AAA+ ATPase, core ; ABC transporter-like ; ABC transporter-like	Oidma1_22091	22091	0	0	-1	3.A.1.	876	4.31	3.92	0	The ATP-binding Cassette (ABC) Superfamily	>Oidma1_22091	gnl|TC-DB|P78577	3.A.1.205.7	100	PF01061; PF01061; PF01061; PF00005; PF00005; PF00005;	2e-128; 8e-072; 1e-057; 3e-047; 4e-024; 4e-024;	ABC2_membrane ABC-2 type transporter; ABC2_membrane ABC-2 type transporter; ABC2_membrane ABC-2 type transporter; ABC_tran ABC transporter; ABC_tran ABC transporter; ABC_tran ABC transporter;						sp|O74676|CDR4_CANAL		2e-271
jgi|Oidma1|42097|	42022					MYC vs FLM UP		MYC Cd vs FLM Cd UP		0.832163	1	7.55085	0.000192379	5.94571	3.50161e-10	0.655264	0.56347	5.52496	4.59766	41.7181	27.3364	616	ABC transporter-like ; ABC transporter-like ; ABC-2 type transporter ; AAA+ ATPase, core ; ABC transporter-like ; ABC transporter-like	Oidma1_42022	42022	2.4e-59	2.4e-59	-1	3.A.1.	876	4.31	3.92	0	The ATP-binding Cassette (ABC) Superfamily	>Oidma1_42022	gnl|TC-DB|A4HWI7	3.A.1.204.6	100	PF01061; PF00005;	6e-045; 2e-027;	ABC2_membrane ABC-2 type transporter; ABC_tran ABC transporter;						sp|Q9ZU35|WBC7_ARATH		2e-59
jgi|Oidma1|25096|	25021						MYC vs FLM DOWN			0.536071	0.018541	0.479458	1.56745e-06	1.60901	0.281027	1.799	4.69452e-05	76.7094	41.1217	36.7789	66.1651	867	MFS general substrate transporter						4.D.3					The Glycan Glucosyl Transferase (OpgH) Family		gnl|TC-DB|A7EIH8	4.D.3.2.1					875	875	3696	0.0	79.5	No hits found	-	-
jgi|Oidma1|126597|	126522					MYC vs FLM UP				0.310844	1	22.5879	0.0223466	28.13	0.165598	0.387112	0.610594	0.127898	0.0397563	2.88895	1.11835	1467	ABC transporter-like ; ABC transporter-like ; ABC-2 type transporter ; CDR ABC transporter ; AAA+ ATPase, core ; ABC transporter-like ; ABC transporter-like	Oidma1_126522	126522	0	0	-1	3.A.1.	876	4.31	3.92	1	The ATP-binding Cassette (ABC) Superfamily	>Oidma1_126522	gnl|TC-DB|P33302	3.A.1.205.1	100	PF01061; PF01061; PF01061; PF00005; PF00005; PF00005;	1e-109; 2e-061; 3e-049; 3e-043; 4e-022; 4e-022;	ABC2_membrane ABC-2 type transporter; ABC2_membrane ABC-2 type transporter; ABC2_membrane ABC-2 type transporter; ABC_tran ABC transporter; ABC_tran ABC transporter; ABC_tran ABC transporter;						sp|O74676|CDR4_CANAL		0
jgi|Oidma1|27010|	26935								MYC Cd vs FLM Cd DOWN	1.24983	1	0.675827	0.0140843	0.41447	0.000321103	0.766494	0.781144	14.1837	17.7272	9.58572	7.34739	479	Sugar transporter ; General substrate transporter ; Major facilitator superfamily ; Sugar transporter, conserved site ; Sugar transporter, conserved site ; MFS general substrate transporter	Oidma1_26935	26935	2.1e-28	2.1e-28	-1	2.A.1.	312	12	1.73	5	The Major Facilitator Superfamily (MFS)	>Oidma1_26935	gnl|TC-DB|Q64L87	2.A.1.1.40	100	PF00083; PF00083; PF00083; PF07690;	1e-078; 4e-028; 1e-049; 1e-023;	Sugar_tr Sugar (and other) transporter; Sugar_tr Sugar (and other) transporter; Sugar_tr Sugar (and other) transporter; MFS_1 Major Facilitator Superfamily;						sp|O74969|GHT2_SCHPO		1e-24
jgi|Oidma1|173142|	173067					MYC vs FLM UP		MYC Cd vs FLM Cd UP		0.689615	1	4.87381	0.00600723	7.53729	0.000273649	1.06648	0.969999	1.81728	1.25322	8.85708	9.4459	533	Amino acid permease-associated region	Oidma1_173067	173067	5.8e-38	5.8e-38	-1	2.A.3.	77	12.13	0.83	5	The Amino Acid-Polyamine-Organocation (APC) Family	>Oidma1_173067	gnl|TC-DB|P32487	2.A.3.10.10	100	PF00324; PF00324; PF00324; PF00324;	7e-031; 1e-006; 1e-016; 5e-009;	AA_permease Amino acid permease; AA_permease Amino acid permease; AA_permease Amino acid permease; AA_permease Amino acid permease;						sp|P32487|LYP1_YEAST		3e-36
jgi|Oidma1|36788|	36713					MYC vs FLM UP				0.580682	1	11.4447	0.036902	7.07821	0.238679	0.359134	0.593003	0.271047	0.157392	3.10205	1.11405	574	Amino acid permease-associated region ; Amino acid/polyamine transporter I	Oidma1_36713	36713	2.9e-22	2.9e-22	-1	2.A.3.	77	12.13	0.83	6	The Amino Acid-Polyamine-Organocation (APC) Family	>Oidma1_36713	gnl|TC-DB|P43059	2.A.3.10.20	100	PF00324;	1e-045;	AA_permease Amino acid permease;						sp|P43059|CAN1_CANAL		1e-20
jgi|Oidma1|28240|	28165							MYC Cd vs FLM Cd UP		1.10111	1	1.92082	0.258602	2.57421	0.0195605	1.47566	0.681156	37.7145	41.5278	72.4429	106.901	467	Major facilitator superfamily MFS-1 ; Major facilitator superfamily ; MFS general substrate transporter						2.A.1					The Major Facilitator Superfamily (MFS)		gnl|TC-DB|P47159	2.A.1.63.4					448	429	722	7e-91	36.8	sp|P47159|YJ94_YEAST	722	2e-89
jgi|Oidma1|28281|	28206						MYC vs FLM DOWN		MYC Cd vs FLM Cd DOWN	1.01233	1	0.421065	0.0108101	0.470622	8.53558e-05	1.13147	0.897811	38.2361	38.7074	16.0999	18.2165	360	Mitochondrial substrate carrier ; Mitochondrial substrate carrier ; Mitochondrial substrate carrier	Oidma1_28206	28206	2.5e-15	2.5e-15	-1	2.A.29.	72	4.42	1.35	3	The Mitochondrial Carrier (MC) Family	>Oidma1_28206	gnl|TC-DB|Q12482	2.A.29.14.4	100	PF00153; PF00153; PF00153; PF00153;	2e-065; 3e-016; 2e-027; 5e-023;	Mito_carr Mitochondrial carrier protein; Mito_carr Mitochondrial carrier protein; Mito_carr Mitochondrial carrier protein; Mito_carr Mitochondrial carrier protein;						sp|Q07534|YD119_YEAST		8e-63
jgi|Oidma1|28292|	28217						MYC vs FLM DOWN			0.824526	0.180987	0.480338	1.67986e-13	0.692856	2.28365e-05	1.18932	0.757834	58.2898	48.0615	27.9988	33.2997	1453	ATPase, P-type, K/Mg/Cd/Cu/Zn/Na/Ca/Na/H-transporter ; ATPase, P-type cation exchange, alpha subunit ; E1-E2 ATPase-associated region ; ATPase, P-type cation-transporter, C-terminal ; ATPase, P-type cation-transporter, N-terminal ; Haloacid dehalogenase-like hydrolase ; ATPase, P-type, K/Mg/Cd/Cu/Zn/Na/Ca/Na/H-transporter ; Calcium-translocating P-type ATPase, PMCA-type ; ATPase, P-type, K/Mg/Cd/…	Oidma1_28217	28217	3.4e-110	3.4e-110	-1	3.A.3.	111	8.67	2.57	0	The P-type ATPase (P-ATPase) Superfamily	>Oidma1_28217	gnl|TC-DB|P23634	3.A.3.2.1	100	PF00122; PF00689; PF00702; PF00690;	5e-072; 3e-052; 9e-022; 1e-007;	E1-E2_ATPase E1-E2 ATPase; Cation_ATPase_C Cation transporting ATPase; Hydrolase haloacid dehalogenase-like hydrolase; Cation_ATPase_N Cation transporter/ATPase;						sp|P38929|ATC2_YEAST		2e-105
jgi|Oidma1|29652|	29577						MYC vs FLM DOWN		MYC Cd vs FLM Cd DOWN	1.10903	1	0.432674	5.61384e-32	0.464365	6.82369e-29	1.19026	0.59874	125.497	139.179	54.2992	64.63	165	ATPase, V0 complex, proteolipid subunit C, ; ATPase, F0/V0 complex, subunit C ; ATPase, F0/V0 complex, subunit C	Oidma1_29577	29577	1e-39	1e-39	-1	3.A.2.	74	1.3	2.25	3	The H+- or Na+-translocating F-type, V-type and A-type ATPase (F-ATPase) Superfamily	>Oidma1_29577	gnl|TC-DB|P23968	3.A.2.2.3	40									sp|O14046|VATO_SCHPO		3e-38
jgi|Oidma1|44689|	44614					MYC vs FLM UP		MYC Cd vs FLM Cd UP		0.498753	0.161621	3.70765	5.32452e-09	11.6634	0	1.56897	0.00523006	12.8509	6.40945	47.6468	74.7563	560	Amino acid permease-associated region ; Amino acid/polyamine transporter I	Oidma1_44614	44614	3.1e-21	3.1e-21	-1	2.A.3.	77	12.13	0.83	5	The Amino Acid-Polyamine-Organocation (APC) Family	>Oidma1_44614	gnl|TC-DB|P15380	2.A.3.10.3	100	PF00324;	2e-048;	AA_permease Amino acid permease;						sp|P15380|PUT4_YEAST		1e-19
jgi|Oidma1|107699|	107624					MYC vs FLM UP				1.15204	1	4.73328	0.000136159	2.08798	0.266776	0.508195	0.0712188	3.26203	3.75799	15.4401	7.84661	539	Amino acid permease-associated region ; Amino acid/polyamine transporter I	Oidma1_107624	107624	3.4e-46	3.4e-46	-1	2.A.3.	77	12.13	0.83	5	The Amino Acid-Polyamine-Organocation (APC) Family	>Oidma1_107624	gnl|TC-DB|Q9Y860	2.A.3.4.2	100	PF00324;	2e-008;	AA_permease Amino acid permease;						sp|P19807|HNM1_YEAST		2e-43
jgi|Oidma1|33206|	33131							MYC Cd vs FLM Cd UP		0.436968	1	14.2765	0.0732331	55.4097	0.00560582	1.69595	0.772746	0.13031	0.0569414	1.86038	3.15511	525	Major facilitator superfamily MFS-1 ; Major facilitator superfamily ; MFS general substrate transporter	Oidma1_33131	33131	3e-39	3e-39	-1	2.A.1.	312	12	1.73	5	The Major Facilitator Superfamily (MFS)	>Oidma1_33131	gnl|TC-DB|P70786	2.A.1.14.3	100	PF07690;	6e-035;	MFS_1 Major Facilitator Superfamily;						sp|P70786|TUB3_AGRVI		1e-37
jgi|Oidma1|35202|	35127				MYC Cd vs MYC DOWN					1.27237	1	0.653312	0.123332	0.178234	0.113555	0.347122	3.47627e-09	74.0677	94.2415	48.3893	16.797	553	Sugar transporter ; General substrate transporter ; Sugar transporter ; Major facilitator superfamily ; Sugar transporter, conserved site ; Sugar transporter, conserved site ; MFS general substrate transporter	Oidma1_35127	35127	2.9e-181	2.9e-181	-1	2.A.1.	312	12	1.73	6	The Major Facilitator Superfamily (MFS)	>Oidma1_35127	gnl|TC-DB|Q8J0V1	2.A.1.1.57	100	PF00083; PF07690;	1e-131; 8e-024;	Sugar_tr Sugar (and other) transporter; MFS_1 Major Facilitator Superfamily;						sp|Q12300|RGT2_YEAST		3e-93
jgi|Oidma1|116245|	116170					MYC vs FLM UP				1.14909	1	3.11364	0.0305074	1.28844	0.922056	0.475497	0.216693	4.63818	5.32969	14.4417	6.86696	549	Amino acid permease-associated region ; Amino acid/polyamine transporter I	Oidma1_116170	116170	5.5e-225	5.5e-225	-1	2.A.3.	77	12.13	0.83	5	The Amino Acid-Polyamine-Organocation (APC) Family	>Oidma1_116170	gnl|TC-DB|Q8NKC4	2.A.3.10.18	100	PF00324;	5e-124;	AA_permease Amino acid permease;						sp|P53388|DIP5_YEAST		2e-99
jgi|Oidma1|119937|	119862					MYC vs FLM UP		MYC Cd vs FLM Cd UP		0.728737	1	5.10191	0.00698848	5.12665	0.000910876	0.732271	0.740266	2.82619	2.05955	14.419	10.5586	547	Amino acid permease-associated region ; Amino acid/polyamine transporter I	Oidma1_119862	119862	5.8e-134	5.8e-134	-1	2.A.3.	77	12.13	0.83	5	The Amino Acid-Polyamine-Organocation (APC) Family	>Oidma1_119862	gnl|TC-DB|P15380	2.A.3.10.3	100	PF00324;	4e-165;	AA_permease Amino acid permease;						sp|P18696|PUTX_EMENI		4e-168
jgi|Oidma1|131264|	131189					MYC vs FLM UP		MYC Cd vs FLM Cd UP		1.05662	1	7.14539	0.000569397	3.92509	0.0303483	0.580419	0.538344	1.34161	1.41758	9.58637	5.56411	559	Amino acid permease-associated region ; Amino acid/polyamine transporter I	Oidma1_131189	131189	7.4e-84	7.4e-84	-1	2.A.3.	77	12.13	0.83	4	The Amino Acid-Polyamine-Organocation (APC) Family	>Oidma1_131189	gnl|TC-DB|P50276	2.A.3.8.4	100									sp|P50276|MUP1_YEAST		4e-82
jgi|Oidma1|137286|	137211					MYC vs FLM UP				1.0882	1	27.6582	0.0360452	12.5168	0.224596	0.492471	0.748296	0.0790525	0.0860254	2.18645	1.07676	520	Amino acid permease-associated region ; Amino acid/polyamine transporter I	Oidma1_137211	137211	2.3e-55	2.3e-55	-1	2.A.3.	77	12.13	0.83	5	The Amino Acid-Polyamine-Organocation (APC) Family	>Oidma1_137211	gnl|TC-DB|Q9Y860	2.A.3.4.2	80									sp|P19807|HNM1_YEAST		2e-53
jgi|Oidma1|185796|	185721					MYC vs FLM UP		MYC Cd vs FLM Cd UP		1.18715	1	2.44517	0.004177	3.79288	1.04747e-12	1.84147	4.31012e-05	13.8692	16.4648	33.9126	62.4489	504	Amino acid permease-associated region ; Amino acid/polyamine transporter I	Oidma1_185721	185721	4.5e-85	4.5e-85	-1	2.A.3.	77	12.13	0.83	6	The Amino Acid-Polyamine-Organocation (APC) Family	>Oidma1_185721	gnl|TC-DB|P19807	2.A.3.4.1	100									sp|P19807|HNM1_YEAST		2e-83
jgi|Oidma1|37424|	37349						MYC vs FLM DOWN			0.833511	0.121861	0.379572	2.19437e-21	0.524337	7.8071e-08	1.1514	0.922771	471.977	393.398	179.149	206.273	281	Protein of unknown function UPF0005						1.A.14					The Calcium Transporter A (CaTA) (formerly the Testis-Enhanced Gene Transfer (TEGT) Family		gnl|TC-DB|Q9HC24	1.A.14.3.6					238	229	444	2e-54	42.4	sp|O74888|BXI1_SCHPO	453	5e-54
jgi|Oidma1|40802|	40727			MYC Cd vs MYC UP		MYC vs FLM UP		MYC Cd vs FLM Cd UP		0.976062	1	437.512	1.22004e-11	1276.79	0	2.84845	0	0.0896384	0.0874926	39.2178	111.71	564	Amino acid permease-associated region ; Amino acid/polyamine transporter I ; Amino acid permease, conserved site	Oidma1_40727	40727	2.3e-85	2.3e-85	-1	2.A.3.	77	12.13	0.83	5	The Amino Acid-Polyamine-Organocation (APC) Family	>Oidma1_40727	gnl|TC-DB|P32487	2.A.3.10.10	100	PF00324;	2e-124;	AA_permease Amino acid permease;						sp|O74543|YCV4_SCHPO		6e-103
jgi|Oidma1|38092|	38017						MYC vs FLM DOWN			0.859782	0.899626	0.453752	4.71701e-07	0.565821	0.0251809	1.07214	0.921746	26.8587	23.0926	12.1872	13.0663	1315	ABC transporter-like ; ABC transporter-like ; ABC transporter, transmembrane region ; AAA+ ATPase, core ; ABC transporter-like ; ABC transporter, transmembrane region, type 1 ; ABC transporter-like ; ABC transporter, transmembrane region, type 1	Oidma1_38017	38017	3.8e-52	3.8e-52	-1	3.A.1.	876	4.31	3.92	4	The ATP-binding Cassette (ABC) Superfamily	>Oidma1_38017	gnl|TC-DB|P53049	3.A.1.208.3	100	PF00005; PF00005; PF00005; PF00664; PF00664; PF00664; PF00437; PF00437;	8e-068; 6e-042; 7e-027; 4e-028; 8e-010; 1e-018; 6e-009; 2e-007;	ABC_tran ABC transporter; ABC_tran ABC transporter; ABC_tran ABC transporter; ABC_membrane ABC transporter transmembrane region; ABC_membrane ABC transporter transmembrane region; ABC_membrane ABC transporter transmembrane region; GSPII_E Type II/IV secretion system protein; GSPII_E Type II/IV secretion system protein;						sp|Q92337|ABC1_SCHPO		1e-90
jgi|Oidma1|38126|	38051								MYC Cd vs FLM Cd DOWN	1.14835	1	0.726183	0.00272807	0.453749	4.83233e-16	0.717535	0.643283	64.2712	73.8056	46.6727	33.4892	509	Major facilitator superfamily MFS-1 ; Major facilitator superfamily ; MFS general substrate transporter	Oidma1_38051	38051	1.4e-97	1.4e-97	-1	2.A.1.	312	12	1.73	6	The Major Facilitator Superfamily (MFS)	>Oidma1_38051	gnl|TC-DB|Q07824	2.A.1.2.16	100	PF07690; PF00083;	5e-044; 8e-006;	MFS_1 Major Facilitator Superfamily; Sugar_tr Sugar (and other) transporter;						sp|O74829|YN2F_SCHPO		8e-115
jgi|Oidma1|38404|	38329								MYC Cd vs FLM Cd DOWN	1.17608	1	0.723155	4.62938e-08	0.486609	9.52143e-16	0.791383	0.411481	67.829	79.7726	49.0509	38.8181	353	Nucleotide-sugar transporter ; UDP-galactose transporter	Oidma1_38329	38329	1.9e-55	1.9e-55	-1	2.A.7.	74	8.31	2.38	6	The Drug/Metabolite Transporter (DMT) Superfamily	>Oidma1_38329	gnl|TC-DB|Q9W4W6	2.A.7.12.5	100	PF04142; PF04142; PF04142; PF00892;	9e-080; 8e-030; 2e-048; 2e-006;	Nuc_sug_transp Nucleotide-sugar transporter; Nuc_sug_transp Nucleotide-sugar transporter; Nuc_sug_transp Nucleotide-sugar transporter; DUF6 Integral membrane protein DUF6;						sp|P87041|GMS1_SCHPO		1e-37
jgi|Oidma1|38482|	38407							MYC Cd vs FLM Cd UP		0.970328	1	1.81648	0.402599	2.17591	0.00122526	1.16233	0.940716	21.047	20.4225	38.2315	44.4375	536	General substrate transporter ; Major facilitator superfamily ; Sugar transporter, conserved site ; Sugar transporter, conserved site ; MFS general substrate transporter	Oidma1_38407	38407	2.9e-53	2.9e-53	-1	2.A.1.	312	12	1.73	6	The Major Facilitator Superfamily (MFS)	>Oidma1_38407	gnl|TC-DB|P15685	2.A.1.1.10	100	PF00083; PF07690;	1e-055; 6e-016;	Sugar_tr Sugar (and other) transporter; MFS_1 Major Facilitator Superfamily;						sp|P38156|MAL31_YEAST		2e-52
jgi|Oidma1|39506|	39431						MYC vs FLM DOWN		MYC Cd vs FLM Cd DOWN	0.838336	0.389952	0.276725	1.83992e-14	0.328022	4.88041e-18	0.993739	0.978691	193.807	162.475	53.6313	53.2955	409	Protein of unknown function DUF6, transmembrane	Oidma1_39431	39431	4.5e-48	4.5e-48	-1	2.A.7.	74	8.31	2.38	5	The Drug/Metabolite Transporter (DMT) Superfamily	>Oidma1_39431	gnl|TC-DB|Q04083	2.A.7.24.1	100	PF00892; PF00892;	2e-011; 2e-008;	DUF6 Integral membrane protein DUF6; DUF6 Integral membrane protein DUF6;						sp|Q03730|YMB8_YEAST		2e-58
jgi|Oidma1|39675|	39600				MYC Cd vs MYC DOWN					0.368143	0.44109	0.535876	0.116651	0.4865	0.0999809	0.334223	0.00112561	29.874	10.9979	16.0088	5.3505	542	Amino acid permease-associated region ; Amino acid/polyamine transporter I ; Surface protein from Gram-positive cocci, anchor region ; Surface protein from Gram-positive cocci, anchor region	Oidma1_39600	39600	6.3e-40	6.3e-40	-1	2.A.3.	77	12.13	0.83	6	The Amino Acid-Polyamine-Organocation (APC) Family	>Oidma1_39600	gnl|TC-DB|P19807	2.A.3.4.1	100	PF00324; PF00324;	5e-007; 3e-005;	AA_permease Amino acid permease; AA_permease Amino acid permease;						sp|P19807|HNM1_YEAST		3e-38
jgi|Oidma1|183937|	183862					MYC vs FLM UP		MYC Cd vs FLM Cd UP		1.54109	1	10.1997	0.000312977	4.26598	0.00459	0.644553	0.637026	2.99639	4.61772	30.5624	19.6991	548	Amino acid permease-associated region ; Amino acid/polyamine transporter I ; Amino acid permease, conserved site	Oidma1_183862	183862	4e-119	4e-119	-1	2.A.3.	77	12.13	0.83	4	The Amino Acid-Polyamine-Organocation (APC) Family	>Oidma1_183862	gnl|TC-DB|Q8J266	2.A.3.10.17	100	PF00324;	6e-157;	AA_permease Amino acid permease;						sp|Q9URZ3|PUT4_SCHPO		6e-130
jgi|Oidma1|169785|	169710					MYC vs FLM UP		MYC Cd vs FLM Cd UP		0.637149	0.921673	5.04684	0.00611253	5.11049	4.07787e-05	0.645184	0.562626	4.81901	3.07042	24.3208	15.6914	526	Amino acid permease-associated region ; Lipocalin	Oidma1_169710	169710	1e-23	1e-23	-1	2.A.3.	77	12.13	0.83	5	The Amino Acid-Polyamine-Organocation (APC) Family	>Oidma1_169710	gnl|TC-DB|P32487	2.A.3.10.10	100	PF00324; PF00324; PF00324;	4e-045; 6e-034; 6e-011;	AA_permease Amino acid permease; AA_permease Amino acid permease; AA_permease Amino acid permease;						sp|P38971|ALP1_YEAST		4e-21
jgi|Oidma1|39844|	39769					MYC vs FLM UP				1.8303	1	21.0087	0.0350175	3.00094	0.531613	0.261446	0.495109	0.162805	0.297982	3.42032	0.894227	557	AMP-dependent synthetase and ligase ; AMP-dependent synthetase and ligase ; AMP-dependent synthetase and ligase						4.C.1					The Fatty Acid Transporter (FAT) Family		gnl|TC-DB|Q42524	4.C.1.1.7					561	533	645	4e-77	35.3	sp|O24145|4CL1_TOBAC	732	1e-88
jgi|Oidma1|102366|	102291					MYC vs FLM UP		MYC Cd vs FLM Cd UP		1.15733	1	2.32932	2.11044e-05	3.43905	0	1.70871	2.43292e-10	39.7077	45.9549	92.4917	158.041	554	AMP-dependent synthetase and ligase ; AMP-dependent synthetase and ligase ; AMP-dependent synthetase and ligase						4.C.1					The Fatty Acid Transporter (FAT) Family		gnl|TC-DB|Q42524	4.C.1.1.7					561	557	679	5e-82	34.3	sp|Q54P77|4CL1_DICDI	903	7e-114
jgi|Oidma1|126953|	126878			MYC Cd vs MYC UP		MYC vs FLM UP		MYC Cd vs FLM Cd UP		1.99065	0.58846	4.7202	0.000587018	5.52636	1.88744e-14	2.33063	7.77672e-06	3.91646	7.79628	18.4865	43.0851	545	AMP-dependent synthetase and ligase ; AMP-dependent synthetase and ligase ; AMP-dependent synthetase and ligase						4.C.1					The Fatty Acid Transporter (FAT) Family		gnl|TC-DB|Q42524	4.C.1.1.7					561	363	562	4e-65	39.9	sp|C8VTR6|Y0074_EMENI	1308	6e-175
jgi|Oidma1|40054|	39979						MYC vs FLM DOWN			0.667391	0.651028	0.29915	0.00278874	0.756336	0.0920385	1.68736	0.384177	20.7441	13.8444	6.20559	10.471	594	Major facilitator superfamily MFS-1 ; MFS general substrate transporter	Oidma1_39979	39979	4e-43	4e-43	-1	2.A.1.	312	12	1.73	6	The Major Facilitator Superfamily (MFS)	>Oidma1_39979	gnl|TC-DB|P39980	2.A.1.16.1	100	PF07690;	2e-011;	MFS_1 Major Facilitator Superfamily;						sp|Q870L2|MIRB_EMENI		5e-115
jgi|Oidma1|40314|	40239						MYC vs FLM DOWN			0.732133	0.358683	0.351575	4.65479e-05	0.572182	3.45493e-14	1.19154	0.909902	127.329	93.2218	44.7657	53.3399	507	Oxysterol-binding protein ; Oxysterol-binding protein						2.D.1					The PI4P/PS Counter Transporter (P/P-CT) Family		gnl|TC-DB|P38755	2.D.1.1.4					437	425	1085	6e-145	52.0	sp|Q9UW25|OBPA_CANAL	1107	5e-147
jgi|Oidma1|135701|	135626					MYC vs FLM UP		MYC Cd vs FLM Cd UP		1.08071	1	36.6466	9.70369e-12	24.455	1.91842e-08	0.721178	0.538236	0.540663	0.584297	19.8134	14.289	623	AMP-dependent synthetase and ligase ; AMP-dependent synthetase and ligase ; AMP-dependent synthetase and ligase						4.C.1					The Fatty Acid Transporter (FAT) Family		gnl|TC-DB|Q91VE0	4.C.1.1.1					643	571	774	3e-94	36.3	sp|O42633|FAT1_COCHE	786	1e-94
jgi|Oidma1|150784|	150709					MYC vs FLM UP		MYC Cd vs FLM Cd UP		0.910663	1	2.31505	0.00355658	2.32856	0.00332256	0.915977	0.777895	14.297	13.0198	33.0984	30.3174	623	AMP-dependent synthetase and ligase ; AMP-dependent synthetase and ligase ; AMP-dependent synthetase and ligase						4.C.1					The Fatty Acid Transporter (FAT) Family		gnl|TC-DB|Q6P1M0	4.C.1.1.10					643	618	767	3e-93	34.3	sp|O42633|FAT1_COCHE	788	5e-95
jgi|Oidma1|131673|	131598					MYC vs FLM UP				1.19341	1	11.4721	0.0157316	6.47541	0.094108	0.673617	0.812324	0.335398	0.400268	3.84773	2.5919	1149	ATPase, P-type, K/Mg/Cd/Cu/Zn/Na/Ca/Na/H-transporter ; ATPase, P-type cation exchange, alpha subunit ; E1-E2 ATPase-associated region ; ATPase, P-type cation-transporter, C-terminal ; ATPase, P-type cation-transporter, N-terminal ; Haloacid dehalogenase-like hydrolase ; ATPase, P-type cation exchange, alpha subunit, eukaryotic ; ATPase, P-type, K/Mg/Cd/Cu/Zn/Na/Ca/Na/H-transporter ; ATPase, P-typ…	Oidma1_131598	131598	2.8e-168	2.8e-168	-1	3.A.3.	111	8.67	2.57	2	The P-type ATPase (P-ATPase) Superfamily	>Oidma1_131598	gnl|TC-DB|P05023	3.A.3.1.1	100	PF00122; PF00689; PF00689; PF00689; PF00690; PF00702; PF00702; PF00702;	9e-068; 2e-027; 9e-008; 6e-020; 6e-022; 2e-019; 9e-011; 1e-009;	E1-E2_ATPase E1-E2 ATPase; Cation_ATPase_C Cation transporting ATPase; Cation_ATPase_C Cation transporting ATPase; Cation_ATPase_C Cation transporting ATPase; Cation_ATPase_N Cation transporter/ATPase; Hydrolase haloacid dehalogenase-like hydrolase; Hydrolase haloacid dehalogenase-like hydrolase; Hydrolase haloacid dehalogenase-like hydrolase;						sp|P18907|AT1A1_HORSE		7e-169
jgi|Oidma1|40891|	40816								MYC Cd vs FLM Cd DOWN	0.662198	0.852979	0.727186	0.201333	0.247043	0.0463862	0.224965	0.40908	4.79942	3.17817	3.49007	0.785143	532	Permease for cytosine/purines, uracil, thiamine, allantoin	Oidma1_40816	40816	1e-66	1e-66	-1	2.A.39.	12	12.17	0.37	6	The Nucleobase:Cation Symporter-1 (NCS1) Family	>Oidma1_40816	gnl|TC-DB|P05316	2.A.39.3.2	100	PF02133;	3e-091;	Transp_cyt_pur Permease for cytosine/purines;						sp|Q9P6J5|YHD5_SCHPO		1e-94
jgi|Oidma1|104068|	103993			MYC Cd vs MYC UP		MYC vs FLM UP		MYC Cd vs FLM Cd UP		0.894071	1	2.73842	0.0473365	8.28427	1.37046e-13	2.70475	5.6133e-06	4.56973	4.08566	12.5138	33.8468	1145	ATPase, P-type, K/Mg/Cd/Cu/Zn/Na/Ca/Na/H-transporter ; E1-E2 ATPase-associated region ; Heavy metal transport/detoxification protein ; Haloacid dehalogenase-like hydrolase ; ATPase, P-type, K/Mg/Cd/Cu/Zn/Na/Ca/Na/H-transporter ; ATPase, P type cation/copper-transporter ; Heavy metal translocating P-type ATPase ; Heavy metal transport/detoxification protein ; ATPase, P-type, K/Mg/Cd/Cu/Zn/Na/Ca/Na…	Oidma1_103993	103993	1.8e-66	1.8e-66	-1	3.A.3.	111	8.67	2.57	2	The P-type ATPase (P-ATPase) Superfamily	>Oidma1_103993	gnl|TC-DB|Q9UVL6	3.A.3.5.9	100	PF00122; PF00702; PF00403;	6e-068; 5e-029; 1e-015;	E1-E2_ATPase E1-E2 ATPase; Hydrolase haloacid dehalogenase-like hydrolase; HMA Heavy-metal-associated domain;						sp|Q64430|ATP7A_MOUSE		1e-52
jgi|Oidma1|41675|	41600								MYC Cd vs FLM Cd DOWN	1.73453	0.000274151	0.735273	3.30682e-05	0.474317	1.33482e-28	1.11892	0.777895	81.9937	142.22	60.2877	67.4574	120	GRIM-19						3.D.1					The H+ or Na+-translocating NADH Dehydrogenase (NDH) Family		gnl|TC-DB|Q7S1I2	3.D.1.6.2					121	117	404	2e-52	65.8	sp|Q95KV7|NDUAD_BOVIN	175	5e-16
jgi|Oidma1|60942|	60867					MYC vs FLM UP				1.44135	1	8.34694	0.00442076	4.29027	0.0619428	0.740842	0.81429	0.729869	1.052	6.09218	4.51334	217	Cytochrome b561 / ferric reductase transmembrane ; Cytochrome b561 / ferric reductase transmembrane						5.B.2					The Eukaryotic Cytochrome b561 (Cytb561) Family		gnl|TC-DB|G9NAJ2	5.B.2.3.2					453	197	298	9e-32	35.0	No hits found	-	-
jgi|Oidma1|42099|	42024						MYC vs FLM DOWN		MYC Cd vs FLM Cd DOWN	1.37629	0.598012	0.459806	6.14126e-08	0.352478	3.82076e-12	1.05504	0.920507	31.1736	42.9041	14.3338	15.1228	293	Mrp, conserved site						3.A.1					The ATP-binding Cassette (ABC) Superfamily		gnl|TC-DB|A0L4L0	3.A.1.132.3					339	251	462	9e-56	39.4	sp|Q6CE48|IND1_YARLI	806	2e-106
jgi|Oidma1|42553|	42478						MYC vs FLM DOWN		MYC Cd vs FLM Cd DOWN	0.77978	0.784585	0.420176	0.00325648	0.421446	3.89943e-08	0.782137	0.672763	42.3648	33.0352	17.8007	13.9226	531	Amino acid permease-associated region ; Amino acid/polyamine transporter I	Oidma1_42478	42478	4.5e-107	4.5e-107	-1	2.A.3.	77	12.13	0.83	5	The Amino Acid-Polyamine-Organocation (APC) Family	>Oidma1_42478	gnl|TC-DB|AAX81451	2.A.3.10.22	100	PF00324;	1e-140;	AA_permease Amino acid permease;						sp|P19145|GAP1_YEAST		2e-104
jgi|Oidma1|102361|	102286					MYC vs FLM UP		MYC Cd vs FLM Cd UP		1.27072	0.518807	6.09636	0.00355287	2.49833	0	0.52075	0.379136	91.3611	116.095	556.97	290.042	323	Cytochrome c1 ; Cytochrome c1 ; Cytochrome c, monohaem ; Cytochrome c, monohaem	Oidma1_102286	102286	6.8e-102	6.8e-102	-1	3.D.3.	14	3.57	3.11	1	The Proton-translocating Quinol:Cytochrome c Reductase (QCR) Superfamily	>Oidma1_102286	gnl|TC-DB|P07143	3.D.3.3.1	60	PF02167;	1e-157;	Cytochrom_C1 Cytochrome C1 family;						sp|P07142|CY1_NEUCR		5e-131
jgi|Oidma1|120840|	120765					MYC vs FLM UP		MYC Cd vs FLM Cd UP		0.946995	0.614517	2.13347	5.95386e-08	2.31313	0	1.02674	0.788607	84.385	79.9122	180.032	184.847	401	DNA/RNA helicase, DEAD/DEAH box type, N-terminal ; DNA/RNA helicase, C-terminal ; DEAD-like helicase, N-terminal ; DNA/RNA helicase, C-terminal ; Helicase, superfamily 1 and 2, ATP-binding ; DNA/RNA helicase, C-terminal ; RNA helicase, DEAD-box type, Q motif ; RNA helicase, ATP-dependent, DEAD-box, conserved site						3.A.18					The Nuclear mRNA Exporter (mRNA-E) Family		gnl|TC-DB|P38919	3.A.18.1.1					411	387	1764	0.0	81.4	sp|A7EM88|FAL1_SCLS1	2095	0.0
jgi|Oidma1|207453|	207378	FLM Cd vs FLM UP				MYC vs FLM UP		MYC Cd vs FLM Cd UP		2.98806	0.0411764	35.6586	0.0104213	3.93534	4.99167e-15	0.329767	0.363524	5.42931	16.2231	193.602	63.8434	554	Ferric reductase-like transmembrane component, N-terminal ; FAD-binding 8 ; Ferric reductase, NAD binding						5.B.1					The Phagocyte (gp91phox) NADPH Oxidase Family		gnl|TC-DB|Q9Y5S8	5.B.1.1.3					564	595	744	1e-91	32.4	sp|Q8CIZ9|NOX1_MOUSE	756	1e-91
jgi|Oidma1|42884|	42809						MYC vs FLM DOWN		MYC Cd vs FLM Cd DOWN	0.6993	0.510729	0.135125	6.13525e-07	0.0216089	4.08648e-07	0.111831	0.13736	34.6601	24.2378	4.68345	0.523753	506	Amino acid permease-associated region ; Amino acid/polyamine transporter I	Oidma1_42809	42809	6.9e-57	6.9e-57	-1	2.A.3.	77	12.13	0.83	6	The Amino Acid-Polyamine-Organocation (APC) Family	>Oidma1_42809	gnl|TC-DB|P19807	2.A.3.4.1	100									sp|P19807|HNM1_YEAST		3e-55
jgi|Oidma1|42893|	42818						MYC vs FLM DOWN			0.366804	0.107059	0.275769	0.00170261	0.73894	0.212235	0.982875	0.997306	19.0042	6.97081	5.24076	5.15102	559	Amino acid/polyamine transporter I	Oidma1_42818	42818	1.1e-26	1.1e-26	-1	2.A.3.	77	12.13	0.83	6	The Amino Acid-Polyamine-Organocation (APC) Family	>Oidma1_42818	gnl|TC-DB|P50276	2.A.3.8.4	100									sp|P50276|MUP1_YEAST		5e-25
jgi|Oidma1|42912|	42837							MYC Cd vs FLM Cd UP		0.440414	0.995752	3.0471	0.128189	11.0128	0	1.59173	6.46372e-10	40.2446	17.7243	122.629	195.193	546	Sugar transporter ; General substrate transporter ; Sugar transporter ; Major facilitator superfamily ; Sugar transporter, conserved site ; MFS general substrate transporter	Oidma1_42837	42837	1.2e-91	1.2e-91	-1	2.A.1.	312	12	1.73	6	The Major Facilitator Superfamily (MFS)	>Oidma1_42837	gnl|TC-DB|P07921	2.A.1.1.9	100	PF00083; PF07690;	8e-079; 2e-032;	Sugar_tr Sugar (and other) transporter; MFS_1 Major Facilitator Superfamily;						sp|P07921|LACP_KLULA		6e-90
jgi|Oidma1|131147|	131072					MYC vs FLM UP		MYC Cd vs FLM Cd UP		1.11595	1	2.71221	0.0123616	2.74284	0.0463853	1.12855	0.934347	7.2518	8.09262	19.6684	22.1967	518	General substrate transporter ; Major facilitator superfamily ; MFS general substrate transporter	Oidma1_131072	131072	1.2e-35	1.2e-35	-1	2.A.1.	312	12	1.73	6	The Major Facilitator Superfamily (MFS)	>Oidma1_131072	gnl|TC-DB|B1PM37	2.A.1.1.64	100	PF00083;	5e-054;	Sugar_tr Sugar (and other) transporter;						sp|Q12300|RGT2_YEAST		2e-33
jgi|Oidma1|43158|	43083						MYC vs FLM DOWN			0.776365	0.53921	0.409537	0.000248548	0.63011	1.58569e-06	1.19451	0.904725	61.9328	48.0825	25.3638	30.2973	335	Ubiquitin fusion degradation protein UFD1						3.A.16					The Endoplasmic Reticular Retrotranslocon (ER-RT) Family		gnl|TC-DB|C8Z8U3	3.A.16.1.2					361	312	547	2e-67	40.4	sp|O42915|UFD1_SCHPO	583	1e-71
jgi|Oidma1|138418|	138343				MYC Cd vs MYC DOWN	MYC vs FLM UP		MYC Cd vs FLM Cd UP		0.865664	1	46.4701	1.20221e-14	11.766	0.00298352	0.219181	9.95579e-08	0.476808	0.412755	22.1573	4.85646	547	General substrate transporter ; Major facilitator superfamily ; MFS general substrate transporter	Oidma1_138343	138343	1.6e-43	1.6e-43	-1	2.A.1.	312	12	1.73	6	The Major Facilitator Superfamily (MFS)	>Oidma1_138343	gnl|TC-DB|P07921	2.A.1.1.9	100	PF00083; PF07690;	3e-055; 5e-030;	Sugar_tr Sugar (and other) transporter; MFS_1 Major Facilitator Superfamily;						sp|P07921|LACP_KLULA		6e-37
jgi|Oidma1|178702|	178627				MYC Cd vs MYC DOWN	MYC vs FLM UP				1.21194	1	3.01877	7.80304e-05	1.20308	0.971297	0.482999	0.00158361	58.7821	71.2405	177.45	85.7081	558	General substrate transporter ; Major facilitator superfamily ; MFS general substrate transporter	Oidma1_178627	178627	5.3e-58	5.3e-58	-1	2.A.1.	312	12	1.73	6	The Major Facilitator Superfamily (MFS)	>Oidma1_178627	gnl|TC-DB|P07921	2.A.1.1.9	100	PF00083; PF07690;	5e-057; 4e-022;	Sugar_tr Sugar (and other) transporter; MFS_1 Major Facilitator Superfamily;						sp|P07921|LACP_KLULA		3e-56
jgi|Oidma1|26274|	26199					MYC vs FLM UP				1.33365	1	7.23779	0.0206016	4.43879	0.110608	0.817903	0.874313	0.558762	0.745193	4.0442	3.30776	511	General substrate transporter ; Major facilitator superfamily ; Sugar transporter, conserved site ; MFS general substrate transporter	Oidma1_26199	26199	4.4e-43	4.4e-43	-1	2.A.1.	312	12	1.73	6	The Major Facilitator Superfamily (MFS)	>Oidma1_26199	gnl|TC-DB|P07921	2.A.1.1.9	100	PF00083; PF07690; PF07690;	6e-063; 2e-015; 3e-013;	Sugar_tr Sugar (and other) transporter; MFS_1 Major Facilitator Superfamily; MFS_1 Major Facilitator Superfamily;						sp|P07921|LACP_KLULA		2e-41
jgi|Oidma1|43735|	43660						MYC vs FLM DOWN			0.886637	1	0.492458	0.0352564	0.588726	0.013534	1.05996	0.945539	57.1174	50.6424	28.1279	29.8145	642	Tetratricopeptide TPR-1 ; Tetratricopeptide region ; Tetratricopeptide region ; Tetratricopeptide region						3.A.20					The Peroxisomal Protein Importer (PPI) Family		gnl|TC-DB|P35056	3.A.20.1.5					612	686	800	3e-98	33.2	sp|Q99144|PEX5_YARLI	1177	4e-153
jgi|Oidma1|43791|	43716								MYC Cd vs FLM Cd DOWN	1.44936	0.370202	0.562372	2.05719e-11	0.440256	2.35833e-06	1.13464	0.886994	61.1451	88.6214	34.3863	39.0161	155	RNA binding motif protein 8 ; RNA recognition motif, RNP-1 ; RNA recognition motif, RNP-1 ; RNA recognition motif, RNP-1						3.A.18					The Nuclear mRNA Exporter (mRNA-E) Family		gnl|TC-DB|Q9Y5S9	3.A.18.1.1					174	84	312	4e-37	65.5	sp|Q5D018|RBM8A_DANRE	334	5e-39
jgi|Oidma1|48688|	48613				MYC Cd vs MYC DOWN	MYC vs FLM UP		MYC Cd vs FLM Cd UP		1.21821	1	13.2702	4.27353e-13	4.71463	0.000488145	0.432806	0.000652848	1.93178	2.35332	25.6351	11.095	525	General substrate transporter ; Major facilitator superfamily ; Sugar transporter, conserved site ; MFS general substrate transporter	Oidma1_48613	48613	4.5e-27	4.5e-27	-1	2.A.1.	312	12	1.73	6	The Major Facilitator Superfamily (MFS)	>Oidma1_48613	gnl|TC-DB|P53048	2.A.1.1.11	100	PF00083; PF00083; PF00083; PF07690;	4e-039; 1e-031; 1e-008; 1e-010;	Sugar_tr Sugar (and other) transporter; Sugar_tr Sugar (and other) transporter; Sugar_tr Sugar (and other) transporter; MFS_1 Major Facilitator Superfamily;						sp|P53048|MAL11_YEAST		2e-25
jgi|Oidma1|105833|	105758					MYC vs FLM UP		MYC Cd vs FLM Cd UP		0.823651	1	3.74134	0.0499825	4.11552	0	0.906027	0.885159	28.2688	23.2836	105.763	95.8242	521	General substrate transporter ; Major facilitator superfamily ; Sugar transporter, conserved site ; MFS general substrate transporter	Oidma1_105758	105758	1.3e-55	1.3e-55	-1	2.A.1.	312	12	1.73	5	The Major Facilitator Superfamily (MFS)	>Oidma1_105758	gnl|TC-DB|P15685	2.A.1.1.10	100	PF00083; PF07690;	3e-059; 8e-017;	Sugar_tr Sugar (and other) transporter; MFS_1 Major Facilitator Superfamily;						sp|P15685|MAL61_YEAST		6e-54
jgi|Oidma1|131364|	131289					MYC vs FLM UP				1.53944	1	6.93402	0.00108243	3.20894	0.0646212	0.712423	0.753399	1.26475	1.947	8.76977	6.24779	477	General substrate transporter ; Major facilitator superfamily ; Sugar transporter, conserved site ; MFS general substrate transporter	Oidma1_131289	131289	6.8e-67	6.8e-67	-1	2.A.1.	312	12	1.73	4	The Major Facilitator Superfamily (MFS)	>Oidma1_131289	gnl|TC-DB|P53048	2.A.1.1.11	100	PF00083; PF07690;	6e-059; 2e-016;	Sugar_tr Sugar (and other) transporter; MFS_1 Major Facilitator Superfamily;						sp|P53048|MAL11_YEAST		1e-64
jgi|Oidma1|38038|	37963					MYC vs FLM UP				1.75401	1	6.89746	0.000676666	1.45505	0.829888	0.370016	0.0731148	1.23478	2.16582	8.51684	3.15137	532	General substrate transporter ; Sugar transporter ; Major facilitator superfamily ; MFS general substrate transporter	Oidma1_37963	37963	3.2e-97	3.2e-97	-1	2.A.1.	312	12	1.73	6	The Major Facilitator Superfamily (MFS)	>Oidma1_37963	gnl|TC-DB|P53048	2.A.1.1.11	100	PF00083; PF07690;	1e-072; 4e-015;	Sugar_tr Sugar (and other) transporter; MFS_1 Major Facilitator Superfamily;						sp|P53048|MAL11_YEAST		2e-95
jgi|Oidma1|45040|	44965						MYC vs FLM DOWN		MYC Cd vs FLM Cd DOWN	0.782357	0.93252	0.422336	0.00847077	0.280758	0.00741046	0.52009	0.719942	7.4702	5.84436	3.15493	1.64085	508	Chromate transporter region	Oidma1_44965	44965	4e-12	4e-12	-1	2.A.51.	3	11.67	0.47	4	The Chromate Ion Transporter (CHR) Family	>Oidma1_44965	gnl|TC-DB|Q55027	2.A.51.1.2	60	PF02417; PF02417; PF02417;	3e-019; 2e-011; 1e-008;	Chromate_transp Chromate transporter; Chromate_transp Chromate transporter; Chromate_transp Chromate transporter;						sp|Q55027|SRPC_SYNE7		2e-10
jgi|Oidma1|49027|	48952					MYC vs FLM UP		MYC Cd vs FLM Cd UP		3.13661	0.796781	9.67998	0.0016981	4.21257	0.00942967	1.365	0.818248	0.621357	1.94895	6.01472	8.2101	537	General substrate transporter ; Sugar transporter ; Major facilitator superfamily ; MFS general substrate transporter	Oidma1_48952	48952	2.4e-52	2.4e-52	-1	2.A.1.	312	12	1.73	6	The Major Facilitator Superfamily (MFS)	>Oidma1_48952	gnl|TC-DB|P15685	2.A.1.1.10	100	PF00083; PF07690;	6e-048; 4e-013;	Sugar_tr Sugar (and other) transporter; MFS_1 Major Facilitator Superfamily;						sp|P38156|MAL31_YEAST		4e-51
jgi|Oidma1|45111|	45036								MYC Cd vs FLM Cd DOWN	1.1776	1	1.2052	0.735752	0.295329	2.45656e-05	0.288565	0.358112	12.3486	14.5417	14.8825	4.29458	487	Major facilitator superfamily MFS-1 ; Major facilitator superfamily ; MFS general substrate transporter	Oidma1_45036	45036	8.8e-54	8.8e-54	-1	2.A.1.	312	12	1.73	4	The Major Facilitator Superfamily (MFS)	>Oidma1_45036	gnl|TC-DB|P15365	2.A.1.14.4	100	PF07690;	7e-031;	MFS_1 Major Facilitator Superfamily;						sp|P15365|DAL5_YEAST		4e-52
jgi|Oidma1|45392|	45317							MYC Cd vs FLM Cd UP		0.851634	1	3.78136	0.061273	3.22706	0.00973861	0.726794	0.773077	4.30796	3.6688	16.2899	11.8394	502	General substrate transporter ; Sugar transporter ; Major facilitator superfamily ; MFS general substrate transporter	Oidma1_45317	45317	2.3e-44	2.3e-44	-1	2.A.1.	312	12	1.73	6	The Major Facilitator Superfamily (MFS)	>Oidma1_45317	gnl|TC-DB|P07921	2.A.1.1.9	100	PF00083; PF07690;	8e-085; 9e-026;	Sugar_tr Sugar (and other) transporter; MFS_1 Major Facilitator Superfamily;						sp|P07921|LACP_KLULA		1e-42
jgi|Oidma1|152304|	152229					MYC vs FLM UP				1.33373	1	4.37043	0.0132743	1.13533	0.883825	0.346469	0.14509	458.452	611.449	2003.63	694.197	536	General substrate transporter ; Sugar transporter ; Major facilitator superfamily ; MFS general substrate transporter	Oidma1_152229	152229	4e-63	4e-63	-1	2.A.1.	312	12	1.73	6	The Major Facilitator Superfamily (MFS)	>Oidma1_152229	gnl|TC-DB|P07921	2.A.1.1.9	100	PF00083; PF07690;	1e-089; 5e-023;	Sugar_tr Sugar (and other) transporter; MFS_1 Major Facilitator Superfamily;						sp|P07921|LACP_KLULA		2e-61
jgi|Oidma1|170305|	170230					MYC vs FLM UP		MYC Cd vs FLM Cd UP		2.15451	0.968837	105.695	2.22893e-08	31.139	0.00386197	0.634747	0.656486	0.943681	2.03317	99.7421	63.311	548	General substrate transporter ; Sugar transporter ; Major facilitator superfamily ; MFS general substrate transporter	Oidma1_170230	170230	8.9e-42	8.9e-42	-1	2.A.1.	312	12	1.73	6	The Major Facilitator Superfamily (MFS)	>Oidma1_170230	gnl|TC-DB|P07921	2.A.1.1.9	100	PF00083; PF07690;	3e-075; 2e-027;	Sugar_tr Sugar (and other) transporter; MFS_1 Major Facilitator Superfamily;						sp|P07921|LACP_KLULA		4e-40
jgi|Oidma1|173138|	173063					MYC vs FLM UP		MYC Cd vs FLM Cd UP		1.1428	1	3.6222	1.72295e-06	3.56937	3.50902e-08	1.12614	0.823788	10.0809	11.5205	36.515	41.121	525	General substrate transporter ; Sugar transporter ; Major facilitator superfamily ; MFS general substrate transporter	Oidma1_173063	173063	7.1e-57	7.1e-57	-1	2.A.1.	312	12	1.73	6	The Major Facilitator Superfamily (MFS)	>Oidma1_173063	gnl|TC-DB|P07921	2.A.1.1.9	100	PF00083; PF07690;	5e-073; 4e-015;	Sugar_tr Sugar (and other) transporter; MFS_1 Major Facilitator Superfamily;						sp|P07921|LACP_KLULA		3e-55
jgi|Oidma1|46597|	46522					MYC vs FLM UP				0.494028	1	32.8049	0.0164932	27.0321	0.105316	0.407093	0.608921	0.111503	0.0550856	3.65784	1.48908	543	General substrate transporter ; Sugar transporter ; Major facilitator superfamily ; Sugar transporter, conserved site ; MFS general substrate transporter	Oidma1_46522	46522	1.4e-100	1.4e-100	-1	2.A.1.	312	12	1.73	5	The Major Facilitator Superfamily (MFS)	>Oidma1_46522	gnl|TC-DB|P15685	2.A.1.1.10	100	PF00083; PF07690;	1e-061; 4e-012;	Sugar_tr Sugar (and other) transporter; MFS_1 Major Facilitator Superfamily;						sp|P38156|MAL31_YEAST		8e-100
jgi|Oidma1|46613|	46538			MYC Cd vs MYC UP				MYC Cd vs FLM Cd UP		0.580482	0.947429	2.88166	0.134697	12.4907	2.93918e-08	2.51612	0.0117337	2.27046	1.31796	6.54271	16.4623	277	Mitochondrial substrate carrier ; Mitochondrial substrate carrier ; Mitochondrial substrate carrier	Oidma1_46538	46538	3.9e-47	3.9e-47	-1	2.A.29.	72	4.42	1.35	4	The Mitochondrial Carrier (MC) Family	>Oidma1_46538	gnl|TC-DB|P38152	2.A.29.7.3	100	PF00153; PF00153; PF00153; PF00153;	2e-059; 7e-019; 7e-021; 4e-021;	Mito_carr Mitochondrial carrier protein; Mito_carr Mitochondrial carrier protein; Mito_carr Mitochondrial carrier protein; Mito_carr Mitochondrial carrier protein;						sp|O13844|YFG5_SCHPO		2e-47
jgi|Oidma1|58381|	58306					MYC vs FLM UP		MYC Cd vs FLM Cd UP		1.36189	1	17.8125	0.000104682	11.3128	0.000184295	0.864941	0.956547	0.46224	0.629519	8.23365	7.12161	520	General substrate transporter ; Sugar transporter ; Major facilitator superfamily ; Sugar transporter, conserved site ; MFS general substrate transporter	Oidma1_58306	58306	8.1e-61	8.1e-61	-1	2.A.1.	312	12	1.73	6	The Major Facilitator Superfamily (MFS)	>Oidma1_58306	gnl|TC-DB|P53048	2.A.1.1.11	100	PF00083; PF07690;	2e-075; 3e-011;	Sugar_tr Sugar (and other) transporter; MFS_1 Major Facilitator Superfamily;						sp|P53048|MAL11_YEAST		4e-59
jgi|Oidma1|59565|	59490					MYC vs FLM UP				2.30225	0.466237	12.6922	0.0045022	2.2853	0.0992849	0.414531	0.367937	30.5981	70.4443	388.358	160.986	546	General substrate transporter ; Sugar transporter ; Major facilitator superfamily ; Sugar transporter, conserved site ; MFS general substrate transporter	Oidma1_59490	59490	5.5e-84	5.5e-84	-1	2.A.1.	312	12	1.73	6	The Major Facilitator Superfamily (MFS)	>Oidma1_59490	gnl|TC-DB|P15685	2.A.1.1.10	100	PF00083; PF07690;	1e-073; 6e-018;	Sugar_tr Sugar (and other) transporter; MFS_1 Major Facilitator Superfamily;						sp|P15685|MAL61_YEAST		3e-82
jgi|Oidma1|47942|	47867						MYC vs FLM DOWN		MYC Cd vs FLM Cd DOWN	1.09511	1	0.377332	9.57298e-09	0.455552	2.42168e-28	1.32213	0.788553	121.497	133.052	45.8445	60.6123	149	ATPase, V0 complex, proteolipid subunit C, ; ATPase, F0/V0 complex, subunit C ; ATPase, V0 complex, proteolipid subunit C, eukaryotic ; ATPase, F0/V0 complex, subunit C	Oidma1_47867	47867	1e-53	1e-53	-1	3.A.2.	74	1.3	2.25	4	The H+- or Na+-translocating F-type, V-type and A-type ATPase (F-ATPase) Superfamily	>Oidma1_47867	gnl|TC-DB|P32842	3.A.2.2.3	40									sp|Q9Y874|VATL2_NEUCR		4e-63
jgi|Oidma1|108753|	108678					MYC vs FLM UP				1.90588	1	7.79495	0.00990093	2.40243	0.379148	0.587396	0.688781	0.624801	1.19079	4.87029	2.86079	551	General substrate transporter ; Sugar transporter ; Major facilitator superfamily ; Sugar transporter, conserved site ; MFS general substrate transporter	Oidma1_108678	108678	4.9e-88	4.9e-88	-1	2.A.1.	312	12	1.73	5	The Major Facilitator Superfamily (MFS)	>Oidma1_108678	gnl|TC-DB|P15685	2.A.1.1.10	100	PF00083; PF07690;	3e-082; 4e-016;	Sugar_tr Sugar (and other) transporter; MFS_1 Major Facilitator Superfamily;						sp|P38156|MAL31_YEAST		6e-87
jgi|Oidma1|125808|	125733					MYC vs FLM UP		MYC Cd vs FLM Cd UP		1.19706	1	5.25475	0.0171439	3.96856	0.0436177	0.904056	0.943609	1.19273	1.42777	6.26751	5.66618	535	General substrate transporter ; Sugar transporter ; Major facilitator superfamily ; Sugar transporter, conserved site ; MFS general substrate transporter	Oidma1_125733	125733	3.9e-127	3.9e-127	-1	2.A.1.	312	12	1.73	5	The Major Facilitator Superfamily (MFS)	>Oidma1_125733	gnl|TC-DB|P53048	2.A.1.1.11	100	PF00083; PF07690; PF07690;	2e-083; 2e-015; 2e-011;	Sugar_tr Sugar (and other) transporter; MFS_1 Major Facilitator Superfamily; MFS_1 Major Facilitator Superfamily;						sp|P53048|MAL11_YEAST		2e-125
jgi|Oidma1|49455|	49380						MYC vs FLM DOWN			0.853843	0.188368	0.443363	5.34419e-09	0.596673	2.27321e-11	1.14909	0.94094	93.7124	80.0157	41.5487	47.7432	610	Major facilitator superfamily MFS-1 ; Ribosomal protein S2 ; MFS general substrate transporter	Oidma1_49380	49380	1.4e-62	1.4e-62	-1	2.A.2.	15	11.73	0.77	5	The Glycoside-Pentoside-Hexuronide (GPH):Cation Symporter Family	>Oidma1_49380	gnl|TC-DB|O14091	2.A.2.6.1	80	PF07690;	3e-011;	MFS_1 Major Facilitator Superfamily;						sp|O14091|SUT1_SCHPO		7e-61
jgi|Oidma1|50631|	50556						MYC vs FLM DOWN			0.699184	0.334739	0.462893	5.71937e-05	0.707582	0.0202543	1.06878	0.962886	24.0111	16.7882	11.1146	11.879	828	Sulphate transporter ; Sulphate transporter/antisigma-factor antagonist STAS ; Sulphate anion transporter ; Sulphate transporter/antisigma-factor antagonist STAS ; Sulphate anion transporter ; Sulphate transporter/antisigma-factor antagonist STAS	Oidma1_50556	50556	6.8e-161	6.8e-161	-1	2.A.53.	25	11.4	1.55	5	The Sulfate Permease (SulP) Family	>Oidma1_50556	gnl|TC-DB|P23622	2.A.53.1.2	100	PF00916; PF01740;	3e-086; 4e-011;	Sulfate_transp Sulfate transporter family; STAS STAS domain;						sp|P23622|CYS14_NEUCR		5e-222
jgi|Oidma1|50779|	50704						MYC vs FLM DOWN			0.85641	0.519216	0.427157	6.25414e-06	0.967069	8.77381e-05	1.93888	0.0135753	192.13	164.542	82.0697	159.124	448	Sodium/calcium exchanger membrane region ; Calcium/proton exchanger superfamily ; Calcium/proton exchanger	Oidma1_50704	50704	3.4e-89	3.4e-89	-1	2.A.19.	18	11.11	1.1	5	The Ca2+:Cation Antiporter (CaCA) Family	>Oidma1_50704	gnl|TC-DB|Q99385	2.A.19.2.2	100	PF01699; PF01699; PF01699;	5e-074; 1e-029; 2e-042;	Na_Ca_ex Sodium/calcium exchanger protein; Na_Ca_ex Sodium/calcium exchanger protein; Na_Ca_ex Sodium/calcium exchanger protein;						sp|Q99385|VCX1_YEAST		2e-87
jgi|Oidma1|52453|	52378						MYC vs FLM DOWN			0.845538	0.899333	0.442585	0.000552305	0.519699	0.00316846	0.992861	0.994267	16.0467	13.5681	7.10203	7.05133	341	Mitochondrial substrate carrier ; Mitochondrial substrate carrier ; Mitochondrial substrate carrier	Oidma1_52378	52378	5.2e-47	5.2e-47	-1	2.A.29.	72	4.42	1.35	2	The Mitochondrial Carrier (MC) Family	>Oidma1_52378	gnl|TC-DB|Q06143	2.A.29.2.3	100	PF00153; PF00153; PF00153;	5e-066; 5e-012; 2e-028;	Mito_carr Mitochondrial carrier protein; Mito_carr Mitochondrial carrier protein; Mito_carr Mitochondrial carrier protein;						sp|Q6FTN2|DIC1_CANGA		1e-46
jgi|Oidma1|135436|	135361					MYC vs FLM UP		MYC Cd vs FLM Cd UP		2.00158	0.58183	7.93079	0.00242968	2.31055	1.25287e-12	0.583138	0.432082	126.397	252.994	1002.43	584.555	539	General substrate transporter ; Sugar transporter ; Major facilitator superfamily ; Sugar transporter, conserved site ; MFS general substrate transporter	Oidma1_135361	135361	9.2e-84	9.2e-84	-1	2.A.1.	312	12	1.73	5	The Major Facilitator Superfamily (MFS)	>Oidma1_135361	gnl|TC-DB|P15685	2.A.1.1.10	100	PF00083;	3e-065;	Sugar_tr Sugar (and other) transporter;						sp|P38156|MAL31_YEAST		4e-82
jgi|Oidma1|136601|	136526				MYC Cd vs MYC DOWN	MYC vs FLM UP		MYC Cd vs FLM Cd UP		1.33962	1	188.001	3.34956e-07	34.6059	0.0254114	0.246588	0.00527565	0.0537985	0.0720697	10.1142	2.49403	550	General substrate transporter ; Sugar transporter ; Major facilitator superfamily ; Sugar transporter, conserved site ; MFS general substrate transporter	Oidma1_136526	136526	4.2e-92	4.2e-92	-1	2.A.1.	312	12	1.73	6	The Major Facilitator Superfamily (MFS)	>Oidma1_136526	gnl|TC-DB|P15685	2.A.1.1.10	100	PF00083; PF07690;	6e-075; 4e-017;	Sugar_tr Sugar (and other) transporter; MFS_1 Major Facilitator Superfamily;						sp|P38156|MAL31_YEAST		1e-91
jgi|Oidma1|53206|	53131								MYC Cd vs FLM Cd DOWN	1.3424	0.747691	0.694096	0.000184669	0.490828	6.41495e-08	0.949278	0.985599	30.1852	40.5207	20.9514	19.8887	535							4.D.1					The Putative Vectorial Glycosyl Polymerization (VGP) Family		gnl|TC-DB|W1QAH1	4.D.1.4.2					479	537	624	4e-75	31.1	No hits found	-	-
jgi|Oidma1|53658|	53583						MYC vs FLM DOWN			0.496946	0.101619	0.190552	3.81016e-05	0.520011	6.40642e-14	1.35615	0.454314	155.896	77.472	29.7063	40.2863	559	Amino acid permease-associated region ; Amino acid/polyamine transporter I	Oidma1_53583	53583	2.8e-59	2.8e-59	-1	2.A.3.	77	12.13	0.83	5	The Amino Acid-Polyamine-Organocation (APC) Family	>Oidma1_53583	gnl|TC-DB|Q9Y860	2.A.3.4.2	100									sp|O60113|YG64_SCHPO		1e-158
jgi|Oidma1|54032|	53957						MYC vs FLM DOWN		MYC Cd vs FLM Cd DOWN	0.856743	0.807557	0.342995	8.22955e-07	0.446745	6.46774e-06	1.11589	0.866928	164.111	140.601	56.2892	62.8126	421	AAA ATPase, core ; AAA+ ATPase, core ; 26S proteasome subunit P45 ; AAA ATPase, conserved site						3.A.16					The Endoplasmic Reticular Retrotranslocon (ER-RT) Family		gnl|TC-DB|P25694	3.A.16.1.2					835	251	493	5e-55	46.6	sp|P78578|PRS6B_ASPNG	1950	0.0
jgi|Oidma1|54697|	54622						MYC vs FLM DOWN		MYC Cd vs FLM Cd DOWN	1.92284	0.0095369	0.245934	4.58961e-11	0.247333	3.87321e-13	1.93377	0.394994	355.399	683.374	87.4047	169.021	167	Ctr copper transporter						1.A.56					The Copper Transporter (Ctr) Family		gnl|TC-DB|Q4WCY0	1.A.56.3.2					187	164	439	4e-56	55.5	No hits found	-	-
jgi|Oidma1|55086|	55011						MYC vs FLM DOWN			1.03623	1	0.49941	4.61254e-10	0.57527	4.68211e-07	1.19363	0.699307	44.962	46.591	22.4545	26.8024	343	Mrp, conserved site						3.A.1					The ATP-binding Cassette (ABC) Superfamily		gnl|TC-DB|A0L4L0	3.A.1.132.3					339	274	359	6e-40	36.1	sp|Q2H317|NBP35_CHAGB	1486	0.0
jgi|Oidma1|55102|	55027						MYC vs FLM DOWN			0.773718	0.552198	0.380176	1.95836e-05	0.55666	3.22092e-05	1.13289	0.940061	953.85	738.011	362.631	410.821	519	SAC3/GANP/Nin1/mts3/eIF-3 p25						3.A.22					The Transcription-coupled TREX/TAP Nuclear mRNA Export Complex (TREX) Family		gnl|TC-DB|Q12049	3.A.22.1.1					470	287	436	3e-48	35.9	sp|Q1MTP1|THP3_SCHPO	744	9e-93
jgi|Oidma1|139056|	138981					MYC vs FLM UP		MYC Cd vs FLM Cd UP		2.39293	0.847692	11.7653	3.05346e-06	7.61318	5.20254e-08	1.54843	0.355725	1.09118	2.61112	12.8381	19.8789	534	General substrate transporter ; Sugar transporter ; Major facilitator superfamily ; Sugar transporter, conserved site ; MFS general substrate transporter	Oidma1_138981	138981	2.4e-68	2.4e-68	-1	2.A.1.	312	12	1.73	6	The Major Facilitator Superfamily (MFS)	>Oidma1_138981	gnl|TC-DB|P53048	2.A.1.1.11	100	PF00083; PF07690;	3e-069; 1e-015;	Sugar_tr Sugar (and other) transporter; MFS_1 Major Facilitator Superfamily;						sp|P53048|MAL11_YEAST		1e-66
jgi|Oidma1|158200|	158125					MYC vs FLM UP		MYC Cd vs FLM Cd UP		0.934576	1	3.84374	0.00302061	2.86061	0.0314131	0.695534	0.64538	3.40385	3.18116	13.0835	9.10004	495	General substrate transporter ; Sugar transporter ; Major facilitator superfamily ; Sugar transporter, conserved site ; MFS general substrate transporter	Oidma1_158125	158125	5.4e-75	5.4e-75	-1	2.A.1.	312	12	1.73	6	The Major Facilitator Superfamily (MFS)	>Oidma1_158125	gnl|TC-DB|P07921	2.A.1.1.9	100	PF00083; PF07690;	6e-074; 3e-029;	Sugar_tr Sugar (and other) transporter; MFS_1 Major Facilitator Superfamily;						sp|P07921|LACP_KLULA		3e-73
jgi|Oidma1|56936|	56861								MYC Cd vs FLM Cd DOWN	1.20013	1	0.816815	0.236821	0.440367	0.0218119	0.647022	0.765719	5.93393	7.12148	4.84693	3.13607	369	Extracellular ligand-binding receptor	Oidma1_56861	56861	6.8e-08	6.8e-08	-1	3.A.1.	876	4.31	3.92	1	The ATP-binding Cassette (ABC) Superfamily	>Oidma1_56861	gnl|TC-DB|P0AD96	3.A.1.4.1	40	PF01094;	3e-022;	ANF_receptor Receptor family ligand binding region;						sp|Q8FWQ3|LIVB8_BRUSU		2e-06
jgi|Oidma1|166184|	166109					MYC vs FLM UP				0.879927	1	2.87403	0.00437446	1.86639	0.260205	0.571425	0.107735	6.47527	5.69777	18.6101	10.6343	537	General substrate transporter ; Sugar transporter ; Major facilitator superfamily ; Sugar transporter, conserved site ; MFS general substrate transporter	Oidma1_166109	166109	1.6e-35	1.6e-35	-1	2.A.1.	312	12	1.73	5	The Major Facilitator Superfamily (MFS)	>Oidma1_166109	gnl|TC-DB|P53048	2.A.1.1.11	100	PF00083; PF07690; PF07690;	1e-055; 4e-012; 5e-008;	Sugar_tr Sugar (and other) transporter; MFS_1 Major Facilitator Superfamily; MFS_1 Major Facilitator Superfamily;						sp|P53048|MAL11_YEAST		8e-34
jgi|Oidma1|169635|	169560					MYC vs FLM UP		MYC Cd vs FLM Cd UP		1.0247	1	6.41896	0.000868151	3.69775	2.54253e-10	0.590294	0.41407	11.8663	12.1594	76.1696	44.9624	535	General substrate transporter ; Sugar transporter ; Major facilitator superfamily ; Sugar transporter, conserved site ; MFS general substrate transporter	Oidma1_169560	169560	2.4e-52	2.4e-52	-1	2.A.1.	312	12	1.73	6	The Major Facilitator Superfamily (MFS)	>Oidma1_169560	gnl|TC-DB|P07921	2.A.1.1.9	100	PF00083; PF07690;	3e-081; 7e-034;	Sugar_tr Sugar (and other) transporter; MFS_1 Major Facilitator Superfamily;						sp|P07921|LACP_KLULA		1e-50
jgi|Oidma1|172806|	172731			MYC Cd vs MYC UP		MYC vs FLM UP		MYC Cd vs FLM Cd UP		1.23409	1	9.63784	0	55.1807	0	7.06571	0	3.96236	4.88993	38.1886	269.83	545	General substrate transporter ; Sugar transporter ; Major facilitator superfamily ; Sugar transporter, conserved site ; MFS general substrate transporter	Oidma1_172731	172731	5.2e-127	5.2e-127	-1	2.A.1.	312	12	1.73	5	The Major Facilitator Superfamily (MFS)	>Oidma1_172731	gnl|TC-DB|P15685	2.A.1.1.10	100	PF00083; PF07690;	1e-085; 1e-014;	Sugar_tr Sugar (and other) transporter; MFS_1 Major Facilitator Superfamily;						sp|P38156|MAL31_YEAST		3e-126
jgi|Oidma1|182997|	182922					MYC vs FLM UP		MYC Cd vs FLM Cd UP		1.05763	1	3.30903	0.000838222	3.32451	6.71465e-05	1.06258	0.907863	6.62321	7.00489	21.9164	23.2879	551	General substrate transporter ; Sugar transporter ; Major facilitator superfamily ; Sugar transporter, conserved site ; MFS general substrate transporter	Oidma1_182922	182922	5.7e-105	5.7e-105	-1	2.A.1.	312	12	1.73	6	The Major Facilitator Superfamily (MFS)	>Oidma1_182922	gnl|TC-DB|P15685	2.A.1.1.10	100	PF00083; PF07690;	1e-080; 1e-014;	Sugar_tr Sugar (and other) transporter; MFS_1 Major Facilitator Superfamily;						sp|P38156|MAL31_YEAST		4e-104
jgi|Oidma1|60919|	60844							MYC Cd vs FLM Cd UP		0.963172	1	4.15589	0.134554	6.73134	2.32813e-05	1.56006	0.637731	1.865	1.79631	7.75073	12.0916	637	ABC transporter-like ; ABC transporter-like ; ABC-2 type transporter ; AAA+ ATPase, core ; ABC transporter-like ; ABC transporter-like	Oidma1_60844	60844	4.9e-55	4.9e-55	-1	3.A.1.	876	4.31	3.92	0	The ATP-binding Cassette (ABC) Superfamily	>Oidma1_60844	gnl|TC-DB|P10090	3.A.1.204.1	100	PF01061; PF00005;	8e-042; 9e-035;	ABC2_membrane ABC-2 type transporter; ABC_tran ABC transporter;						sp|Q84TH5|WBC26_ARATH		9e-56
jgi|Oidma1|188247|	188172					MYC vs FLM UP				1.70298	0.866884	3.10638	0.0240517	1.48109	0.630018	0.811962	0.853849	3.86864	6.5882	12.0175	9.75773	509	General substrate transporter ; Sugar transporter ; Major facilitator superfamily ; Sugar transporter, conserved site ; MFS general substrate transporter	Oidma1_188172	188172	5.4e-118	5.4e-118	-1	2.A.1.	312	12	1.73	5	The Major Facilitator Superfamily (MFS)	>Oidma1_188172	gnl|TC-DB|P47186	2.A.1.1.18	100	PF00083; PF07690;	2e-094; 1e-015;	Sugar_tr Sugar (and other) transporter; MFS_1 Major Facilitator Superfamily;						sp|P47186|MPH23_YEAST		3e-116
jgi|Oidma1|120160|	120085					MYC vs FLM UP		MYC Cd vs FLM Cd UP		0.707942	1	8.25153	0.000352362	8.19654	0.00137659	0.703224	0.74684	1.13183	0.801273	9.33937	6.56767	532	General substrate transporter ; Sugar transporter ; Major facilitator superfamily ; Sugar transporter, conserved site ; Sugar transporter, conserved site ; MFS general substrate transporter	Oidma1_120085	120085	6.9e-92	6.9e-92	-1	2.A.1.	312	12	1.73	6	The Major Facilitator Superfamily (MFS)	>Oidma1_120085	gnl|TC-DB|P15685	2.A.1.1.10	100	PF00083; PF07690;	3e-078; 1e-013;	Sugar_tr Sugar (and other) transporter; MFS_1 Major Facilitator Superfamily;						sp|P38156|MAL31_YEAST		3e-91
jgi|Oidma1|67006|	66931			MYC Cd vs MYC UP				MYC Cd vs FLM Cd UP		0.82355	1	1.24746	0.930365	3.8584	3.39021e-13	2.54724	1.76324e-07	101.379	83.491	126.467	322.141	454	Major facilitator superfamily MFS-1 ; Major facilitator superfamily ; MFS general substrate transporter	Oidma1_66931	66931	1.6e-49	1.6e-49	-1	2.A.1.	312	12	1.73	5	The Major Facilitator Superfamily (MFS)	>Oidma1_66931	gnl|TC-DB|P53322	2.A.1.14.11	100	PF07690;	1e-038;	MFS_1 Major Facilitator Superfamily;						sp|P53322|TNA1_YEAST		8e-48
jgi|Oidma1|84313|	84238					MYC vs FLM UP				1.78957	1	7.36813	0.00203759	2.36129	0.359995	0.573512	0.515823	0.913035	1.63394	6.72736	3.85822	134	Heat shock protein 70						1.A.33					The Cation Channel-forming Heat Shock Protein-70 (Hsp70) Family		gnl|TC-DB|P08107	1.A.33.1.3					641	133	287	5e-31	42.9	sp|P11503|HSP70_ONCVO	295	5e-32
jgi|Oidma1|80028|	79953						MYC vs FLM DOWN			0.594762	0.393828	0.382628	0.00224742	0.653721	0.0255241	1.01615	0.982133	22.8507	13.5907	8.74333	8.88456	424	Camphor resistance CrcB protein						1.A.43					The Camphor Resistance or Fluoride Exporter (Fluc) Family		gnl|TC-DB|Q7SB51	1.A.43.2.6					526	440	1145	5e-154	54.1	No hits found	-	-
jgi|Oidma1|42875|	42800					MYC vs FLM UP		MYC Cd vs FLM Cd UP		0.863423	1	13.9383	0.00145196	12.8165	0.0024368	0.79393	0.898342	0.417804	0.360741	5.82347	4.62343	504	Major facilitator superfamily MFS-1 ; Major facilitator superfamily ; Aspartate/ornithine carbamoyltransferase ; MFS general substrate transporter	Oidma1_42800	42800	7.6e-24	7.6e-24	-1	2.A.1.	312	12	1.73	6	The Major Facilitator Superfamily (MFS)	>Oidma1_42800	gnl|TC-DB|P53389	2.A.1.2.33	100	PF07690;	1e-034;	MFS_1 Major Facilitator Superfamily;						sp|P53389|HOL1_YEAST		4e-22
jgi|Oidma1|83092|	83017				MYC Cd vs MYC DOWN		MYC vs FLM DOWN		MYC Cd vs FLM Cd DOWN	0.869147	0.582613	0.139298	1.12099e-22	0.0609567	1.03496e-16	0.380337	0.0263338	131.367	114.177	18.2992	6.95985	610	Na+/solute symporter ; Na+/solute symporter ; Na+/solute symporter	Oidma1_83017	83017	1.3e-166	1.3e-166	-1	2.A.21.	21	13.43	0.66	6	The Solute:Sodium Symporter (SSS) Family	>Oidma1_83017	gnl|TC-DB|P33413	2.A.21.6.1	20									sp|O94469|DUR31_SCHPO		2e-174
jgi|Oidma1|108598|	108523			MYC Cd vs MYC UP		MYC vs FLM UP		MYC Cd vs FLM Cd UP		2.15542	1	9.35693	0.00824573	11.4396	2.21084e-07	2.63517	0.00966199	0.53916	1.16212	5.04489	13.2941	540	Major facilitator superfamily MFS-1 ; Major facilitator superfamily ; GPCR, rhodopsin-like ; MFS general substrate transporter	Oidma1_108523	108523	2.2e-16	2.2e-16	-1	2.A.1.	312	12	1.73	6	The Major Facilitator Superfamily (MFS)	>Oidma1_108523	gnl|TC-DB|P53389	2.A.1.2.33	100	PF07690; PF00083;	4e-039; 1e-007;	MFS_1 Major Facilitator Superfamily; Sugar_tr Sugar (and other) transporter;						sp|Q9HDX4|YKN1_SCHPO		4e-15
jgi|Oidma1|20928|	20853					MYC vs FLM UP				5.94419	0.931291	27.1631	0.0151844	1.89559	0.730444	0.414819	0.627342	0.113773	0.676291	3.09044	1.28197	285	Major facilitator superfamily MFS-1 ; Major facilitator superfamily ; MFS general substrate transporter	Oidma1_20853	20853	0.000326	0.000326	-1	2.A.1.	312	12	1.73	7	The Major Facilitator Superfamily (MFS)	>Oidma1_20853	gnl|TC-DB|Q08777	2.A.1.13.4	60	PF07690;	1e-019;	MFS_1 Major Facilitator Superfamily;						sp|Q8NCK7|MOT11_HUMAN		3e-14
jgi|Oidma1|86799|	86724						MYC vs FLM DOWN		MYC Cd vs FLM Cd DOWN	0.808774	0.997081	0.321081	0.0266468	0.303674	2.44376e-08	0.764927	0.834464	83.7923	67.769	26.9041	20.5797	127	Heat shock protein DnaJ ; Heat shock protein DnaJ, N-terminal ; Heat shock protein DnaJ, N-terminal ; Heat shock protein DnaJ, N-terminal ; TonB box, conserved site ; Heat shock protein DnaJ, N-terminal ; Heat shock protein DnaJ, N-terminal						1.P.1					The Polyoma Virus SV40 ER Penitration Channel (VPEC) Family		gnl|TC-DB|Q9NXW2	1.P.1.1.1					375	85	155	2e-13	40.0	sp|Q5P9E0|DNAJ_ANAMM	208	3e-19
jgi|Oidma1|27304|	27229					MYC vs FLM UP		MYC Cd vs FLM Cd UP		1.31769	1	16.1444	1.77455e-14	16.8145	5.1758e-05	1.37238	0.689271	1.80262	2.37529	29.1022	39.9392	523	Major facilitator superfamily MFS-1 ; Major facilitator superfamily ; MFS general substrate transporter	Oidma1_27229	27229	1.5e-19	1.5e-19	-1	2.A.1.	312	12	1.73	6	The Major Facilitator Superfamily (MFS)	>Oidma1_27229	gnl|TC-DB|P32071	2.A.1.2.2	100	PF07690;	5e-045;	MFS_1 Major Facilitator Superfamily;						sp|Q9HDX4|YKN1_SCHPO		6e-21
jgi|Oidma1|35228|	35153					MYC vs FLM UP		MYC Cd vs FLM Cd UP		1.17353	1	479.954	0.00325732	1052.42	0.00011875	2.57327	0.222813	0.00802156	0.00941356	3.84998	9.90703	490	Major facilitator superfamily MFS-1 ; Major facilitator superfamily ; MFS general substrate transporter	Oidma1_35153	35153	9.6e-40	9.6e-40	-1	2.A.1.	312	12	1.73	6	The Major Facilitator Superfamily (MFS)	>Oidma1_35153	gnl|TC-DB|P36035	2.A.1.12.2	100	PF07690; PF00083;	7e-029; 3e-014;	MFS_1 Major Facilitator Superfamily; Sugar_tr Sugar (and other) transporter;						sp|P36035|JEN1_YEAST		5e-38
jgi|Oidma1|95031|	94956						MYC vs FLM DOWN		MYC Cd vs FLM Cd DOWN	0.99675	1	0.456318	0.00233051	0.497442	2.52568e-08	1.08658	0.990184	41.2285	41.0945	18.8133	20.4421	132	Heat shock protein DnaJ ; Heat shock protein DnaJ, N-terminal ; Heat shock protein DnaJ, N-terminal ; Heat shock protein DnaJ, N-terminal ; Heat shock protein DnaJ, N-terminal						1.P.1					The Polyoma Virus SV40 ER Penitration Channel (VPEC) Family		gnl|TC-DB|Q9NXW2	1.P.1.1.1					375	66	128	1e-09	45.5	sp|Q9P7C6|CWC23_SCHPO	209	1e-19
jgi|Oidma1|97193|	97118							MYC Cd vs FLM Cd UP		#DIV/0!	1	#DIV/0!	0.030508	1800.01	0	0.200608	0.408138	0	0.136289	1222.89	245.322	53	Ubiquitin ; Ubiquitin ; Ubiquitin						3.A.25					The Symbiont-specific ERAD-like Machinery (SELMA) Family		gnl|TC-DB|B7FZS1	3.A.25.1.1					381	48	181	3e-18	72.9	sp|P0DJ25|RL40_TETTS	204	1e-21
jgi|Oidma1|98326|	98251						MYC vs FLM DOWN			0.800719	0.376714	0.4811	1.62809e-07	0.651867	8.92149e-05	1.08494	0.92545	44.412	35.5615	21.3666	23.1814	164	Calcium-binding EF-hand ; Calcium-binding EF-hand ; Calcium-binding EF-hand ; Calcium-binding EF-hand ; Calcium-binding EF-hand						1.I.1					The Eukaryotic Nuclear Pore Complex (E-NPC) Family		gnl|TC-DB|P06704	1.I.1.1.1					161	162	363	7e-45	48.1	sp|O35648|CETN3_MOUSE	375	3e-45
jgi|Oidma1|99438|	99363		FLM Cd vs FLM DOWN				MYC vs FLM DOWN			0.0847796	1.34024e-07	0.0338629	1.73426e-10	0.278437	0.137549	0.697099	0.870211	96.5761	8.18769	3.27035	2.27976	562	Major facilitator superfamily MFS-1 ; Major facilitator superfamily ; MFS general substrate transporter	Oidma1_99363	99363	7.8e-41	7.8e-41	-1	2.A.1.	312	12	1.73	6	The Major Facilitator Superfamily (MFS)	>Oidma1_99363	gnl|TC-DB|Q09752	2.A.1.48.3	80	PF07690; PF07690; PF07690;	2e-051; 6e-037; 4e-014;	MFS_1 Major Facilitator Superfamily; MFS_1 Major Facilitator Superfamily; MFS_1 Major Facilitator Superfamily;						sp|Q00357|TOXA_COCCA		1e-80
jgi|Oidma1|100082|	100007		FLM Cd vs FLM DOWN				MYC vs FLM DOWN		MYC Cd vs FLM Cd DOWN	0.486956	0.00341539	0.12123	1.95112e-10	0.248698	3.98922e-22	0.998972	0.965065	122.126	59.4702	14.8054	14.7901	540	Amino acid permease-associated region ; Amino acid/polyamine transporter I	Oidma1_100007	100007	2.9e-37	2.9e-37	-1	2.A.3.	77	12.13	0.83	7	The Amino Acid-Polyamine-Organocation (APC) Family	>Oidma1_100007	gnl|TC-DB|Q9Y860	2.A.3.4.2	100									sp|Q09887|YC9D_SCHPO		7e-166
jgi|Oidma1|100181|	100106						MYC vs FLM DOWN		MYC Cd vs FLM Cd DOWN	0.836297	0.512788	0.318231	3.3072e-19	0.333247	1.10332e-06	0.875759	0.7188	138.701	115.995	44.1391	38.6552	534	Tetracycline resistance protein, TetA ; Major facilitator superfamily MFS-1 ; Major facilitator superfamily ; MFS general substrate transporter	Oidma1_100106	100106	1.6e-08	1.6e-08	-1	2.A.1.	312	12	1.73	5	The Major Facilitator Superfamily (MFS)	>Oidma1_100106	gnl|TC-DB|Q8NRB5	2.A.1.2.24	100	PF07690; PF07690; PF00083;	7e-029; 3e-022; 1e-007;	MFS_1 Major Facilitator Superfamily; MFS_1 Major Facilitator Superfamily; Sugar_tr Sugar (and other) transporter;						sp|P25351|YCR3_YEAST		3e-35
jgi|Oidma1|100182|	100107						MYC vs FLM DOWN		MYC Cd vs FLM Cd DOWN	0.990385	1	0.447908	3.5814e-06	0.384243	6.64237e-17	0.849612	0.872754	67.2761	66.6292	30.1335	25.6018	564	Major facilitator superfamily MFS-1 ; Major facilitator superfamily ; Sugar transporter, conserved site ; MFS general substrate transporter	Oidma1_100107	100107	3.8e-72	3.8e-72	-1	2.A.1.	312	12	1.73	4	The Major Facilitator Superfamily (MFS)	>Oidma1_100107	gnl|TC-DB|Q07824	2.A.1.2.16	100	PF07690;	2e-052;	MFS_1 Major Facilitator Superfamily;						sp|Q9USN4|YJA1_SCHPO		4e-76
jgi|Oidma1|100186|	100111								MYC Cd vs FLM Cd DOWN	1.4995	0.10245	0.537098	6.21002e-07	0.447603	1.23176e-07	1.24964	0.847167	86.3769	129.522	46.3928	57.9744	125	ATPase, V1/A1 complex, subunit F ; ATPase, V1 complex, subunit F, eukaryotic ; ATPase, V1 complex, subunit F, eukaryotic						3.A.2					The H+- or Na+-translocating F-type, V-type and A-type ATPase (F-ATPase) Superfamily		gnl|TC-DB|P39111	3.A.2.2.3					118	115	388	6e-50	67.0	sp|A6RRW0|VATF_BOTFB	629	3e-85
jgi|Oidma1|36685|	36610					MYC vs FLM UP		MYC Cd vs FLM Cd UP		3.3634	0.851326	28.1235	1.77198e-07	7.15148	0.000131425	0.855273	0.864796	0.444258	1.49422	12.4941	10.6859	498	Major facilitator superfamily MFS-1 ; Major facilitator superfamily ; MFS general substrate transporter	Oidma1_36610	36610	9.5e-35	9.5e-35	-1	2.A.1.	312	12	1.73	8	The Major Facilitator Superfamily (MFS)	>Oidma1_36610	gnl|TC-DB|P42670	2.A.1.3.11	100	PF07690;	5e-041;	MFS_1 Major Facilitator Superfamily;						sp|Q08902|YO378_YEAST		8e-38
jgi|Oidma1|100449|	100374						MYC vs FLM DOWN			0.915997	0.586377	0.411453	2.43905e-09	0.530356	4.89383e-07	1.18071	0.906989	158.221	144.93	65.1004	76.8644	152	Ubiquitin-conjugating enzyme, E2 ; Ubiquitin-conjugating enzyme, E2 ; Ubiquitin-conjugating enzyme, E2 ; Ubiquitin-conjugating enzyme, E2 ; Ubiquitin-conjugating enzyme, E2 ; Ubiquitin-conjugating enzyme/RWD-like						3.A.20					The Peroxisomal Protein Importer (PPI) Family		gnl|TC-DB|P62837	3.A.20.1.1					147	143	346	1e-42	42.0	sp|Q4WLA7|UBC2_ASPFU	780	3e-107
jgi|Oidma1|100499|	100424						MYC vs FLM DOWN		MYC Cd vs FLM Cd DOWN	0.60983	0.177482	0.0679463	2.72903e-07	0.0793065	9.22979e-76	0.711789	0.655622	227.987	139.033	15.4908	11.0262	588	Permease for cytosine/purines, uracil, thiamine, allantoin	Oidma1_100424	100424	1.6e-73	1.6e-73	-1	2.A.39.	12	12.17	0.37	5	The Nucleobase:Cation Symporter-1 (NCS1) Family	>Oidma1_100424	gnl|TC-DB|Q04895	2.A.39.3.1	100	PF02133;	8e-088;	Transp_cyt_pur Permease for cytosine/purines;						sp|Q9P6J5|YHD5_SCHPO		4e-81
jgi|Oidma1|100567|	100492				MYC Cd vs MYC DOWN		MYC vs FLM DOWN		MYC Cd vs FLM Cd DOWN	0.981936	0.99833	0.315277	1.77455e-14	0.158909	4.99713e-20	0.494925	6.83327e-10	309.801	304.204	97.673	48.3408	623	Amino acid transporter, transmembrane	Oidma1_100492	100492	5.9e-13	5.9e-13	-1	2.A.18.	26	10.73	0.86	3	The Amino Acid/Auxin Permease (AAAP) Family	>Oidma1_100492	gnl|TC-DB|Q6IT47	2.A.18.4.2	40	PF01490;	3e-009;	Aa_trans Transmembrane amino acid transporter protein;
jgi|Oidma1|100579|	100504							MYC Cd vs FLM Cd UP		0.62297	0.600908	0.974687	0.390954	2.02263	0.0101515	1.29276	0.635772	30.2096	18.8197	29.445	38.0653	541	Amino acid permease-associated region ; Amino acid/polyamine transporter I ; Amino acid permease, conserved site	Oidma1_100504	100504	5.2e-103	5.2e-103	-1	2.A.3.	77	12.13	0.83	6	The Amino Acid-Polyamine-Organocation (APC) Family	>Oidma1_100504	gnl|TC-DB|Q8J266	2.A.3.10.17	100	PF00324;	5e-150;	AA_permease Amino acid permease;						sp|Q9URZ3|PUT4_SCHPO		1e-109
jgi|Oidma1|100718|	100643						MYC vs FLM DOWN			0.638082	0.550615	0.387972	0.00373557	0.714943	0.121375	1.17584	0.918895	13.3929	8.54576	5.19607	6.10973	862	Protein of unknown function DUF1212						2.A.79					The Threonine/Serine Exporter (ThrE) Family		gnl|TC-DB|C4YTQ0	2.A.79.1.10					1105	468	1439	0.0	54.5	sp|O14267|YFPC_SCHPO	1474	0.0
jgi|Oidma1|101966|	101891							MYC Cd vs FLM Cd UP		0.795152	0.637928	1.77741	0.204345	2.16451	0.0069855	0.968325	0.950696	18.7672	14.9228	33.3571	32.3005	458	Protein of unknown function DUF895, eukaryotic ; MFS general substrate transporter	Oidma1_101891	101891	2.7e-89	2.7e-89	-1	2.A.1.	312	12	1.73	6	The Major Facilitator Superfamily (MFS)	>Oidma1_101891	gnl|TC-DB|Q5A7S4	2.A.1.58.1	60
jgi|Oidma1|102180|	102105							MYC Cd vs FLM Cd UP		1.23749	1	2.19957	0.366388	2.37675	2.51066e-06	1.33718	0.849979	23.1996	28.7094	51.0292	68.2352	574	General substrate transporter ; Sugar transporter ; Major facilitator superfamily ; Sugar transporter, conserved site ; MFS general substrate transporter	Oidma1_102105	102105	3.7e-123	3.7e-123	-1	2.A.1.	312	12	1.73	5	The Major Facilitator Superfamily (MFS)	>Oidma1_102105	gnl|TC-DB|P53048	2.A.1.1.11	100	PF00083; PF07690; PF07690;	2e-079; 4e-012; 4e-010;	Sugar_tr Sugar (and other) transporter; MFS_1 Major Facilitator Superfamily; MFS_1 Major Facilitator Superfamily;						sp|P53048|MAL11_YEAST		2e-121
jgi|Oidma1|39720|	39645					MYC vs FLM UP		MYC Cd vs FLM Cd UP		0.711056	1	3.92052	0.0397099	4.53508	0.0322577	0.822517	0.872837	1.67486	1.19092	6.56633	5.40092	522	Major facilitator superfamily MFS-1 ; Major facilitator superfamily ; MFS general substrate transporter	Oidma1_39645	39645	1.3e-05	1.3e-05	-1	2.A.1.	312	12	1.73	6	The Major Facilitator Superfamily (MFS)	>Oidma1_39645	gnl|TC-DB|P53389	2.A.1.2.33	40	PF07690;	3e-035;	MFS_1 Major Facilitator Superfamily;						sp|P53389|HOL1_YEAST		0.0006
jgi|Oidma1|39733|	39658					MYC vs FLM UP		MYC Cd vs FLM Cd UP		1.19437	1	6.68444	0	7.9366	0	1.4181	0.00921503	9.59442	11.4592	64.1334	90.9475	513	Major facilitator superfamily MFS-1 ; Major facilitator superfamily ; MFS general substrate transporter	Oidma1_39658	39658	3.7e-66	3.7e-66	-1	2.A.1.	312	12	1.73	4	The Major Facilitator Superfamily (MFS)	>Oidma1_39658	gnl|TC-DB|P15365	2.A.1.14.4	100	PF07690;	2e-027;	MFS_1 Major Facilitator Superfamily;						sp|P15365|DAL5_YEAST		2e-64
jgi|Oidma1|39751|	39676					MYC vs FLM UP				2.90414	1	43.5639	0.0425884	3.29346	0.669217	0.219555	0.509528	0.0450142	0.130728	1.961	0.430546	507	Major facilitator superfamily MFS-1 ; Major facilitator superfamily ; MFS general substrate transporter	Oidma1_39676	39676	3.2e-78	3.2e-78	-1	2.A.1.	312	12	1.73	6	The Major Facilitator Superfamily (MFS)	>Oidma1_39676	gnl|TC-DB|P28873	2.A.1.2.6	100	PF07690;	5e-041;	MFS_1 Major Facilitator Superfamily;						sp|P38776|YHK8_YEAST		1e-97
jgi|Oidma1|102902|	102827							MYC Cd vs FLM Cd UP		0.830293	1	3.07553	0.268633	4.98465	0.0170315	1.34569	0.833013	1.26888	1.05354	3.90247	5.25152	627	Multicopper oxidase, type 1 ; Multicopper oxidase, type 2 ; Multicopper oxidase, type 3 ; Multicopper oxidase, copper-binding site ; Multicopper oxidase, copper-binding site ; Cupredoxin						2.A.108					The Iron/Lead Transporter (ILT) Family		gnl|TC-DB|P38993	2.A.108.1.1					636	595	1520	0.0	50.9	sp|P38993|FET3_YEAST	1520	0.0
jgi|Oidma1|102942|	102867				MYC Cd vs MYC DOWN					0.505947	0.0801167	1.4094	0.827133	1.27988	1	0.459451	2.59395e-07	34.8205	17.6173	49.0761	22.5481	517	General substrate transporter ; Major facilitator superfamily ; Sugar transporter, conserved site ; Heavy metal transport/detoxification protein ; MFS general substrate transporter	Oidma1_102867	102867	2.7e-40	2.7e-40	-1	2.A.1.	312	12	1.73	6	The Major Facilitator Superfamily (MFS)	>Oidma1_102867	gnl|TC-DB|P07921	2.A.1.1.9	100	PF00083; PF07690;	7e-056; 8e-029;	Sugar_tr Sugar (and other) transporter; MFS_1 Major Facilitator Superfamily;						sp|P07921|LACP_KLULA		1e-38
jgi|Oidma1|103502|	103427							MYC Cd vs FLM Cd UP		0.500695	0.888404	2.01615	0.415854	4.55365	0	1.13087	0.652215	48.2251	24.1461	97.2289	109.953	537	Major facilitator superfamily MFS-1 ; Major facilitator superfamily ; MFS general substrate transporter	Oidma1_103427	103427	1.8e-10	1.8e-10	-1	2.A.1.	312	12	1.73	5	The Major Facilitator Superfamily (MFS)	>Oidma1_103427	gnl|TC-DB|P53943	2.A.1.2.36	100	PF07690;	5e-040;	MFS_1 Major Facilitator Superfamily;						sp|Q9USN4|YJA1_SCHPO		1e-29
jgi|Oidma1|40895|	40820			MYC Cd vs MYC UP		MYC vs FLM UP		MYC Cd vs FLM Cd UP		0.833708	1	8.74941	0.00800722	27.4487	1.24963e-11	2.61551	0.00766631	0.870539	0.725775	7.61671	19.9216	477	Major facilitator superfamily MFS-1 ; Major facilitator superfamily ; MFS general substrate transporter	Oidma1_40820	40820	1.3e-54	1.3e-54	-1	2.A.1.	312	12	1.73	6	The Major Facilitator Superfamily (MFS)	>Oidma1_40820	gnl|TC-DB|P53322	2.A.1.14.11	100	PF07690;	1e-043;	MFS_1 Major Facilitator Superfamily;						sp|P53322|TNA1_YEAST		6e-53
jgi|Oidma1|103536|	103461						MYC vs FLM DOWN			0.681733	0.29105	0.291006	3.99332e-07	0.580391	0.0142837	1.35967	0.769239	18.8436	12.8463	5.48359	7.45587	515	Major facilitator superfamily MFS-1 ; Major facilitator superfamily ; MFS general substrate transporter	Oidma1_103461	103461	2e-27	2e-27	-1	2.A.1.	312	12	1.73	7	The Major Facilitator Superfamily (MFS)	>Oidma1_103461	gnl|TC-DB|O59726	2.A.1.48.4	80	PF07690;	4e-032;	MFS_1 Major Facilitator Superfamily;						sp|O42922|YBIH_SCHPO		3e-21
jgi|Oidma1|43342|	43267					MYC vs FLM UP		MYC Cd vs FLM Cd UP		1.73173	1	1272.07	0	1581.28	1.80192e-07	2.15268	0.053586	0.0850617	0.147304	108.204	232.929	561	Major facilitator superfamily MFS-1 ; Major facilitator superfamily ; MFS general substrate transporter	Oidma1_43267	43267	1.3e-16	1.3e-16	-1	2.A.1.	312	12	1.73	6	The Major Facilitator Superfamily (MFS)	>Oidma1_43267	gnl|TC-DB|P53389	2.A.1.2.33	100	PF07690; PF00083;	1e-033; 9e-010;	MFS_1 Major Facilitator Superfamily; Sugar_tr Sugar (and other) transporter;						sp|P53389|HOL1_YEAST		6e-15
jgi|Oidma1|104225|	104150						MYC vs FLM DOWN		MYC Cd vs FLM Cd DOWN	1.03375	1	0.45927	3.20399e-05	0.390755	1.13146e-06	0.87953	0.902832	40.6187	41.9895	18.6549	16.4076	480	Major facilitator superfamily MFS-1 ; Major facilitator superfamily ; Sugar transporter, conserved site ; Bacterial regulatory protein, LuxR ; MFS general substrate transporter	Oidma1_104150	104150	8.7e-62	8.7e-62	-1	2.A.1.	312	12	1.73	5	The Major Facilitator Superfamily (MFS)	>Oidma1_104150	gnl|TC-DB|Q07824	2.A.1.2.16	100	PF07690;	3e-056;	MFS_1 Major Facilitator Superfamily;						sp|Q9USN4|YJA1_SCHPO		4e-70
jgi|Oidma1|43382|	43307			MYC Cd vs MYC UP		MYC vs FLM UP		MYC Cd vs FLM Cd UP		2.45413	0.817735	8.07415	0.000479206	7.58185	1.9944e-08	2.3045	0.00670669	1.13309	2.78076	9.14876	21.0833	531	Major facilitator superfamily MFS-1 ; Major facilitator superfamily ; MFS general substrate transporter	Oidma1_43307	43307	6.6e-42	6.6e-42	-1	2.A.1.	312	12	1.73	8	The Major Facilitator Superfamily (MFS)	>Oidma1_43307	gnl|TC-DB|O59726	2.A.1.48.4	100	PF07690;	5e-037;	MFS_1 Major Facilitator Superfamily;						sp|Q00357|TOXA_COCCA		1e-85
jgi|Oidma1|104508|	104433						MYC vs FLM DOWN			0.771281	0.527592	0.368205	1.89224e-05	0.656663	0.000247135	1.37551	0.657204	41.3274	31.875	15.2169	20.9311	623							1.A.4					The Transient Receptor Potential Ca2+ Channel (TRP-CC) Family		gnl|TC-DB|Q12324	1.A.4.4.1					675	551	1027	2e-131	38.7	sp|Q12324|YVC1_YEAST	1027	5e-130
jgi|Oidma1|104551|	104476								MYC Cd vs FLM Cd DOWN	1.2425	1	0.640626	0.0280409	0.389016	1.6399e-05	0.754502	0.765838	16.4437	20.4313	10.5343	7.94812	502	Major facilitator superfamily MFS-1 ; Major facilitator superfamily ; MFS general substrate transporter	Oidma1_104476	104476	2.9e-68	2.9e-68	-1	2.A.1.	312	12	1.73	8	The Major Facilitator Superfamily (MFS)	>Oidma1_104476	gnl|TC-DB|Q09752	2.A.1.48.3	100	PF07690; PF00083;	2e-044; 1e-009;	MFS_1 Major Facilitator Superfamily; Sugar_tr Sugar (and other) transporter;						sp|Q09752|FNX1_SCHPO		1e-66
jgi|Oidma1|104738|	104663							MYC Cd vs FLM Cd UP		1.02232	1	2.13268	0.192424	2.26066	0.000851647	1.08366	0.984161	18.0579	18.4608	38.5116	41.7336	546	General substrate transporter ; Sugar transporter ; Major facilitator superfamily ; Sugar transporter, conserved site ; MFS general substrate transporter	Oidma1_104663	104663	2e-102	2e-102	-1	2.A.1.	312	12	1.73	6	The Major Facilitator Superfamily (MFS)	>Oidma1_104663	gnl|TC-DB|P15685	2.A.1.1.10	100	PF00083; PF07690;	5e-068; 3e-014;	Sugar_tr Sugar (and other) transporter; MFS_1 Major Facilitator Superfamily;						sp|P15685|MAL61_YEAST		1e-100
jgi|Oidma1|104765|	104690						MYC vs FLM DOWN		MYC Cd vs FLM Cd DOWN	0.832953	0.8917	0.28531	1.21617e-05	0.132906	1.58344e-05	0.388013	0.443636	17.721	14.7608	5.05598	1.96179	497	Multi antimicrobial extrusion protein MatE ; Multi antimicrobial extrusion protein MatE ; Peptidase, trypsin-like serine and cysteine	Oidma1_104690	104690	9.4e-51	9.4e-51	-1	2.A.66.	44	12.23	1.15	5	The Multidrug/Oligosaccharidyl-lipid/Polysaccharide (MOP) Flippase Superfamily	>Oidma1_104690	gnl|TC-DB|P38767	2.A.66.1.5	100	PF01554; PF01554; PF01554;	2e-073; 4e-031; 8e-041;	MatE MatE; MatE MatE; MatE MatE;						sp|Q10085|YAO6_SCHPO		2e-131
jgi|Oidma1|45708|	45633					MYC vs FLM UP		MYC Cd vs FLM Cd UP		1.78625	1	45.7948	0.00060801	11.5228	0.00114999	0.449451	0.391911	0.272671	0.487059	12.4869	5.61226	538	Major facilitator superfamily MFS-1 ; Major facilitator superfamily ; MFS general substrate transporter	Oidma1_45633	45633	3.9e-50	3.9e-50	-1	2.A.1.	312	12	1.73	6	The Major Facilitator Superfamily (MFS)	>Oidma1_45633	gnl|TC-DB|Q09752	2.A.1.48.3	100	PF07690;	5e-042;	MFS_1 Major Facilitator Superfamily;						sp|Q09752|FNX1_SCHPO		2e-48
jgi|Oidma1|104995|	104920						MYC vs FLM DOWN		MYC Cd vs FLM Cd DOWN	0.570431	0.794163	0.172835	0.0313967	0.385213	4.16263e-06	1.27137	0.777895	70.1932	40.0404	12.1319	15.4241	1550	ABC transporter-like ; ABC transporter-like ; ABC-2 type transporter ; CDR ABC transporter ; AAA+ ATPase, core ; ABC transporter-like ; ABC transporter-like	Oidma1_104920	104920	0	0	-1	3.A.1.	876	4.31	3.92	0	The ATP-binding Cassette (ABC) Superfamily	>Oidma1_104920	gnl|TC-DB|P33302	3.A.1.205.1	100	PF01061; PF01061; PF01061; PF00005; PF00005; PF00005;	5e-128; 2e-073; 2e-055; 2e-053; 2e-028; 5e-026;	ABC2_membrane ABC-2 type transporter; ABC2_membrane ABC-2 type transporter; ABC2_membrane ABC-2 type transporter; ABC_tran ABC transporter; ABC_tran ABC transporter; ABC_tran ABC transporter;						sp|O74676|CDR4_CANAL		0
jgi|Oidma1|104997|	104922							MYC Cd vs FLM Cd UP		0.882552	0.937311	1.76477	0.402986	2.42681	0.000120811	1.21363	0.814448	17.5676	15.5043	31.0028	37.626	518	General substrate transporter ; Sugar transporter ; Major facilitator superfamily ; MFS general substrate transporter	Oidma1_104922	104922	1.5e-51	1.5e-51	-1	2.A.1.	312	12	1.73	6	The Major Facilitator Superfamily (MFS)	>Oidma1_104922	gnl|TC-DB|P07921	2.A.1.1.9	100	PF00083; PF07690;	2e-081; 8e-024;	Sugar_tr Sugar (and other) transporter; MFS_1 Major Facilitator Superfamily;						sp|P07921|LACP_KLULA		7e-50
jgi|Oidma1|105003|	104928						MYC vs FLM DOWN		MYC Cd vs FLM Cd DOWN	0.796936	0.470438	0.175306	7.33733e-11	0.14739	2.49837e-14	0.670028	0.698877	47.48	37.8385	8.32354	5.57701	506	Major facilitator superfamily MFS-1 ; Major facilitator superfamily ; Flagellar basal body rod protein ; MFS general substrate transporter	Oidma1_104928	104928	2.8e-58	2.8e-58	-1	2.A.1.	312	12	1.73	5	The Major Facilitator Superfamily (MFS)	>Oidma1_104928	gnl|TC-DB|P53322	2.A.1.14.11	100	PF07690;	2e-035;	MFS_1 Major Facilitator Superfamily;						sp|P53322|TNA1_YEAST		1e-56
jgi|Oidma1|60559|	60484					MYC vs FLM UP		MYC Cd vs FLM Cd UP		1.7963	1	58.2144	1.8902e-12	40.6672	0	1.25485	0.593348	0.345358	0.620366	20.1048	25.2285	685	Major facilitator superfamily MFS-1 ; Major facilitator superfamily ; MFS general substrate transporter	Oidma1_60484	60484	7e-15	7e-15	-1	2.A.1.	312	12	1.73	3	The Major Facilitator Superfamily (MFS)	>Oidma1_60484	gnl|TC-DB|O69070	2.A.1.3.29	100	PF07690; PF07690;	6e-031; 9e-025;	MFS_1 Major Facilitator Superfamily; MFS_1 Major Facilitator Superfamily;						sp|Q00357|TOXA_COCCA		7e-38
jgi|Oidma1|105271|	105196						MYC vs FLM DOWN			1.01057	1	0.492526	0.000398597	0.595278	0.00451882	1.22139	0.80719	17.2271	17.4091	8.48479	10.3632	319	Mitochondrial carrier protein ; Mitochondrial substrate carrier ; Mitochondrial substrate carrier ; Mitochondrial substrate carrier	Oidma1_105196	105196	2.8e-39	2.8e-39	-1	2.A.29.	72	4.42	1.35	4	The Mitochondrial Carrier (MC) Family	>Oidma1_105196	gnl|TC-DB|Q9HC21	2.A.29.16.1	100	PF00153; PF00153; PF00153; PF00153;	2e-080; 3e-028; 4e-027; 2e-026;	Mito_carr Mitochondrial carrier protein; Mito_carr Mitochondrial carrier protein; Mito_carr Mitochondrial carrier protein; Mito_carr Mitochondrial carrier protein;						sp|A7ER02|TPC1_SCLS1		6e-130
jgi|Oidma1|105351|	105276						MYC vs FLM DOWN		MYC Cd vs FLM Cd DOWN	1.59894	0.47377	0.22428	0.000571812	0.0885144	1.67599e-39	0.631039	0.253194	70.9351	113.421	15.9093	10.0394	582	Major facilitator superfamily MFS-1 ; Major facilitator superfamily ; MFS general substrate transporter	Oidma1_105276	105276	3.7e-33	3.7e-33	-1	2.A.1.	312	12	1.73	6	The Major Facilitator Superfamily (MFS)	>Oidma1_105276	gnl|TC-DB|O59726	2.A.1.48.4	100	PF07690; PF00083;	2e-039; 5e-008;	MFS_1 Major Facilitator Superfamily; Sugar_tr Sugar (and other) transporter;						sp|Q00357|TOXA_COCCA		6e-54
jgi|Oidma1|105484|	105409						MYC vs FLM DOWN			0.930456	0.824097	0.471272	5.89303e-09	0.561339	4.40566e-08	1.10828	0.886594	52.6055	48.9471	24.7915	27.476	442	CDP-alcohol phosphatidyltransferase ; Choline/ethanolaminephosphotransferase ; CDP-alcohol phosphatidyltransferase						4.F.1					The Choline/EthanolaminePhosphotransferase 1 (CEPT1) Family		gnl|TC-DB|O82567	4.F.1.1.2					389	391	481	4e-56	34.3	sp|O13901|YF3A_SCHPO	537	6e-63
jgi|Oidma1|81502|	81427					MYC vs FLM UP				1.28134	1	25.0488	0.000519287	5.33787	0.250236	0.273053	0.1034	0.23128	0.296349	5.79329	1.58188	473	Major facilitator superfamily MFS-1 ; Major facilitator superfamily ; MFS general substrate transporter	Oidma1_81427	81427	4.5e-39	4.5e-39	-1	2.A.1.	312	12	1.73	6	The Major Facilitator Superfamily (MFS)	>Oidma1_81427	gnl|TC-DB|P32071	2.A.1.2.2	100	PF07690; PF00083;	1e-036; 8e-007;	MFS_1 Major Facilitator Superfamily; Sugar_tr Sugar (and other) transporter;						sp|P32071|CYHR_CANMA		2e-37
jgi|Oidma1|105948|	105873							MYC Cd vs FLM Cd UP		0.944312	1	2.7349	0.0503244	2.78078	0.0275638	0.960154	0.968254	4.48351	4.23383	12.2619	11.7733	529	Major facilitator superfamily MFS-1 ; MFS general substrate transporter	Oidma1_105873	105873	1.1e-15	1.1e-15	-1	2.A.1.	312	12	1.73	6	The Major Facilitator Superfamily (MFS)	>Oidma1_105873	gnl|TC-DB|Q07824	2.A.1.2.16	100	PF07690;	4e-017;	MFS_1 Major Facilitator Superfamily;						sp|Q07824|TPO1_YEAST		5e-14
jgi|Oidma1|100343|	100268					MYC vs FLM UP		MYC Cd vs FLM Cd UP		1.94896	0.508995	15.5489	0.00168942	12.7415	0	1.59706	0.474346	4.85167	9.4557	75.4382	120.48	538	Major facilitator superfamily MFS-1 ; Major facilitator superfamily ; MFS general substrate transporter	Oidma1_100268	100268	5.8e-70	5.8e-70	-1	2.A.1.	312	12	1.73	5	The Major Facilitator Superfamily (MFS)	>Oidma1_100268	gnl|TC-DB|P15365	2.A.1.14.4	100	PF07690;	6e-037;	MFS_1 Major Facilitator Superfamily;						sp|P15365|DAL5_YEAST		3e-68
jgi|Oidma1|106159|	106084						MYC vs FLM DOWN		MYC Cd vs FLM Cd DOWN	1.27495	0.983578	0.485044	0.000253194	0.43124	8.24177e-17	1.13353	0.757623	59.5082	75.8701	28.8641	32.7182	284	ABC transporter-like ; ABC transporter-like ; AAA+ ATPase, core ; ABC transporter-like	Oidma1_106084	106084	2.7e-11	2.7e-11	-1	3.A.1.	876	4.31	3.92	0	The ATP-binding Cassette (ABC) Superfamily	>Oidma1_106084	gnl|TC-DB|P38045	3.A.1.16.1	100	PF00005;	1e-025;	ABC_tran ABC transporter;						sp|Q7Z991|YE31_SCHPO		1e-73
jgi|Oidma1|106256|	106181		FLM Cd vs FLM DOWN					MYC Cd vs FLM Cd UP		0.498923	0.0250302	1.09762	0.144681	2.88279	0.000649627	1.31037	0.344881	34.903	17.4139	38.3103	50.2006	510	Major facilitator superfamily MFS-1 ; Major facilitator superfamily ; MFS general substrate transporter	Oidma1_106181	106181	4.5e-48	4.5e-48	-1	2.A.1.	312	12	1.73	6	The Major Facilitator Superfamily (MFS)	>Oidma1_106181	gnl|TC-DB|P53322	2.A.1.14.11	100	PF07690;	3e-038;	MFS_1 Major Facilitator Superfamily;						sp|Q10097|YAOI_SCHPO		1e-64
jgi|Oidma1|106329|	106254								MYC Cd vs FLM Cd DOWN	1.72796	0.482968	0.518341	0.00488411	0.442346	0.000516335	1.47462	0.728337	10.5946	18.307	5.49162	8.09804	1100	ATPase, P-type, K/Mg/Cd/Cu/Zn/Na/Ca/Na/H-transporter ; E1-E2 ATPase-associated region ; Heavy metal transport/detoxification protein ; Haloacid dehalogenase-like hydrolase ; ATPase, P-type, K/Mg/Cd/Cu/Zn/Na/Ca/Na/H-transporter ; ATPase, P type cation/copper-transporter ; Heavy metal translocating P-type ATPase ; Heavy metal transport/detoxification protein ; ATPase, P-type, K/Mg/Cd/Cu/Zn/Na/Ca/Na…	Oidma1_106254	106254	3.9e-119	3.9e-119	-1	3.A.3.	111	8.67	2.57	2	The P-type ATPase (P-ATPase) Superfamily	>Oidma1_106254	gnl|TC-DB|Q9UVL6	3.A.3.5.9	100	PF00122; PF00702; PF00403;	7e-075; 9e-031; 1e-009;	E1-E2_ATPase E1-E2 ATPase; Hydrolase haloacid dehalogenase-like hydrolase; HMA Heavy-metal-associated domain;						sp|P37385|ATSY_SYNE7		4e-80
jgi|Oidma1|104826|	104751					MYC vs FLM UP		MYC Cd vs FLM Cd UP		1.237	1	5.29099	0.0102993	3.37848	3.66431e-08	0.789864	0.782752	10.6391	13.1605	56.2913	44.4625	529	Major facilitator superfamily MFS-1 ; Major facilitator superfamily ; MFS general substrate transporter	Oidma1_104751	104751	2e-46	2e-46	-1	2.A.1.	312	12	1.73	5	The Major Facilitator Superfamily (MFS)	>Oidma1_104751	gnl|TC-DB|P15365	2.A.1.14.4	100	PF07690;	8e-034;	MFS_1 Major Facilitator Superfamily;						sp|Q07904|YL004_YEAST		1e-57
jgi|Oidma1|106729|	106654						MYC vs FLM DOWN			0.916685	0.490325	0.490162	5.82752e-16	0.587524	4.11096e-10	1.09877	0.777895	80.1881	73.5073	39.3052	43.1873	335	Protein kinase, core ; Serine/threonine protein kinase-related ; Tyrosine protein kinase ; Serine/threonine protein kinase ; Protein kinase, core ; Protein kinase ATP binding, conserved site ; Serine/threonine protein kinase, active site ; Protein kinase-like						1.I.1					The Eukaryotic Nuclear Pore Complex (E-NPC) Family		gnl|TC-DB|P06493	1.I.1.1.3					297	287	861	9e-116	54.4	sp|Q9HGY5|PHO85_CANAX	1228	1e-169
jgi|Oidma1|106761|	106686						MYC vs FLM DOWN		MYC Cd vs FLM Cd DOWN	1.358	1	0.272798	0.00219445	0.272368	1.28455e-12	1.35586	0.622744	53.8793	73.1681	14.6982	19.9287	1481	ABC transporter-like ; ABC transporter-like ; ABC-2 type transporter ; CDR ABC transporter ; AAA+ ATPase, core ; ABC transporter-like ; ABC transporter-like ; Aldehyde dehydrogenase, conserved site	Oidma1_106686	106686	0	0	-1	3.A.1.	876	4.31	3.92	0	The ATP-binding Cassette (ABC) Superfamily	>Oidma1_106686	gnl|TC-DB|P43071	3.A.1.205.4	100	PF01061; PF01061; PF01061; PF00005; PF00005; PF00005;	4e-125; 2e-072; 1e-053; 2e-046; 4e-023; 3e-024;	ABC2_membrane ABC-2 type transporter; ABC2_membrane ABC-2 type transporter; ABC2_membrane ABC-2 type transporter; ABC_tran ABC transporter; ABC_tran ABC transporter; ABC_tran ABC transporter;						sp|O74676|CDR4_CANAL		0
jgi|Oidma1|106813|	106738						MYC vs FLM DOWN		MYC Cd vs FLM Cd DOWN	0.221606	0.050301	0.0201725	0.000321936	0.211048	0.00324393	2.31849	0.276288	138.135	30.6116	2.78653	6.46053	1478	ABC transporter-like ; ABC transporter-like ; ABC-2 type transporter ; CDR ABC transporter ; AAA+ ATPase, core ; ABC transporter-like ; ABC transporter-like	Oidma1_106738	106738	0	0	-1	3.A.1.	876	4.31	3.92	0	The ATP-binding Cassette (ABC) Superfamily	>Oidma1_106738	gnl|TC-DB|P43071	3.A.1.205.4	100	PF01061; PF01061; PF01061; PF00005; PF00005; PF00005;	2e-119; 2e-066; 5e-054; 2e-048; 1e-022; 8e-027;	ABC2_membrane ABC-2 type transporter; ABC2_membrane ABC-2 type transporter; ABC2_membrane ABC-2 type transporter; ABC_tran ABC transporter; ABC_tran ABC transporter; ABC_tran ABC transporter;						sp|O74676|CDR4_CANAL		0
jgi|Oidma1|106081|	106006					MYC vs FLM UP		MYC Cd vs FLM Cd UP		1.95447	0.445918	8.49173	0.000608265	2.91689	6.36936e-05	0.671356	0.581594	5.53878	10.8254	47.0338	31.5764	562	Major facilitator superfamily MFS-1 ; Major facilitator superfamily ; MFS general substrate transporter	Oidma1_106006	106006	7.7e-65	7.7e-65	-1	2.A.1.	312	12	1.73	6	The Major Facilitator Superfamily (MFS)	>Oidma1_106006	gnl|TC-DB|P32071	2.A.1.2.2	100	PF07690; PF00083; PF00083;	2e-041; 4e-006; 5e-006;	MFS_1 Major Facilitator Superfamily; Sugar_tr Sugar (and other) transporter; Sugar_tr Sugar (and other) transporter;						sp|P53283|TPO2_YEAST		1e-72
jgi|Oidma1|106914|	106839						MYC vs FLM DOWN		MYC Cd vs FLM Cd DOWN	1.23796	1	0.447818	0.00686098	0.418522	9.41951e-05	1.15697	0.509609	229.795	284.477	102.906	119.06	550	Amino acid permease-associated region ; Amino acid/polyamine transporter I	Oidma1_106839	106839	3.4e-49	3.4e-49	-1	2.A.3.	77	12.13	0.83	5	The Amino Acid-Polyamine-Organocation (APC) Family	>Oidma1_106839	gnl|TC-DB|Q9Y860	2.A.3.4.2	100	PF00324;	1e-012;	AA_permease Amino acid permease;						sp|P19807|HNM1_YEAST		5e-41
jgi|Oidma1|107264|	107189					MYC vs FLM UP				1.48019	1	11.0588	0.00852495	3.88028	0.237839	0.519365	0.628545	0.40235	0.595555	4.44951	2.31092	549	Major facilitator superfamily MFS-1 ; Major facilitator superfamily ; MFS general substrate transporter	Oidma1_107189	107189	4.3e-68	4.3e-68	-1	2.A.1.	312	12	1.73	5	The Major Facilitator Superfamily (MFS)	>Oidma1_107189	gnl|TC-DB|P15365	2.A.1.14.4	100	PF07690;	1e-038;	MFS_1 Major Facilitator Superfamily;						sp|P15365|DAL5_YEAST		2e-66
jgi|Oidma1|107020|	106945				MYC Cd vs MYC DOWN				MYC Cd vs FLM Cd DOWN	2.44967	0.0856654	1.9831	0.229043	0.400582	7.20221e-05	0.494827	0.00828219	12.8885	31.5725	25.5592	12.6474	1482	ABC transporter-like ; ABC transporter-like ; ABC transporter, transmembrane region ; AAA+ ATPase, core ; ABC transporter-like ; ABC transporter, transmembrane region, type 1 ; ABC transporter-like ; ABC transporter, transmembrane region, type 1	Oidma1_106945	106945	1.7e-93	1.7e-93	-1	3.A.1.	876	4.31	3.92	6	The ATP-binding Cassette (ABC) Superfamily	>Oidma1_106945	gnl|TC-DB|P53049	3.A.1.208.3	100	PF00005; PF00005; PF00005; PF00664;	3e-061; 2e-027; 7e-035; 4e-022;	ABC_tran ABC transporter; ABC_tran ABC transporter; ABC_tran ABC transporter; ABC_membrane ABC transporter transmembrane region;						sp|P53049|YOR1_YEAST		9e-92
jgi|Oidma1|107151|	107076								MYC Cd vs FLM Cd DOWN	1.57126	0.145089	0.771883	4.12759e-05	0.440719	1.94653e-09	0.897138	0.883732	47.1209	74.0394	36.3719	32.6306	252	Protein of unknown function DUF125, transmembrane	Oidma1_107076	107076	5.1e-43	5.1e-43	-1	2.A.89.	4	5	0	5	The Vacuolar Iron Transporter (VIT) Family	>Oidma1_107076	gnl|TC-DB|P47818	2.A.89.1.1	80									sp|P47818|CCC1_YEAST		2e-41
jgi|Oidma1|108329|	108254					MYC vs FLM UP		MYC Cd vs FLM Cd UP		2.03878	1	146.755	1.51439e-12	43.5454	7.46535e-07	0.604948	0.143836	0.11772	0.240005	17.276	10.4511	512	Major facilitator superfamily MFS-1 ; Major facilitator superfamily ; MFS general substrate transporter	Oidma1_108254	108254	8.7e-92	8.7e-92	-1	2.A.1.	312	12	1.73	6	The Major Facilitator Superfamily (MFS)	>Oidma1_108254	gnl|TC-DB|P36035	2.A.1.12.2	100	PF00083; PF00083; PF07690;	7e-030; 4e-028; 1e-028;	Sugar_tr Sugar (and other) transporter; Sugar_tr Sugar (and other) transporter; MFS_1 Major Facilitator Superfamily;						sp|P36035|JEN1_YEAST		4e-90
jgi|Oidma1|107217|	107142						MYC vs FLM DOWN		MYC Cd vs FLM Cd DOWN	0.917039	0.890364	0.365204	5.90914e-09	0.340998	4.12806e-08	0.856257	0.875883	28.1676	25.8308	10.2869	8.80825	550	Amino acid permease-associated region ; Amino acid/polyamine transporter I	Oidma1_107142	107142	7.9e-123	7.9e-123	-1	2.A.3.	77	12.13	0.83	6	The Amino Acid-Polyamine-Organocation (APC) Family	>Oidma1_107142	gnl|TC-DB|Q8NKC4	2.A.3.10.18	100	PF00324;	3e-130;	AA_permease Amino acid permease;						sp|P53388|DIP5_YEAST		2e-84
jgi|Oidma1|111727|	111652				MYC Cd vs MYC DOWN	MYC vs FLM UP				3.23091	0.527868	27.0581	0	0.42912	0.140829	0.0512397	8.04646e-89	5.91305	19.1046	159.996	8.19814	454	Major facilitator superfamily MFS-1 ; Major facilitator superfamily ; MFS general substrate transporter	Oidma1_111652	111652	4.1e-29	4.1e-29	-1	2.A.1.	312	12	1.73	6	The Major Facilitator Superfamily (MFS)	>Oidma1_111652	gnl|TC-DB|Q12235	2.A.1.14.20	60	PF07690;	3e-036;	MFS_1 Major Facilitator Superfamily;						sp|Q07904|YL004_YEAST		1e-44
jgi|Oidma1|119199|	119124					MYC vs FLM UP				0.766146	1	66.1646	0.0252654	18.4011	0.223565	0.213074	0.427876	0.0622932	0.0477257	4.1216	0.878206	496	Major facilitator superfamily MFS-1 ; Major facilitator superfamily ; MFS general substrate transporter	Oidma1_119124	119124	9.6e-64	9.6e-64	-1	2.A.1.	312	12	1.73	6	The Major Facilitator Superfamily (MFS)	>Oidma1_119124	gnl|TC-DB|Q07824	2.A.1.2.16	100	PF07690; PF00083;	2e-048; 2e-008;	MFS_1 Major Facilitator Superfamily; Sugar_tr Sugar (and other) transporter;						sp|Q9USN4|YJA1_SCHPO		6e-115
jgi|Oidma1|107711|	107636								MYC Cd vs FLM Cd DOWN	0.94928	1	0.54299	0.00903052	0.420778	8.82075e-13	0.735622	0.766677	55.7093	52.8838	30.2496	22.2523	566	Major facilitator superfamily MFS-1 ; Major facilitator superfamily ; Sugar transporter, conserved site ; MFS general substrate transporter	Oidma1_107636	107636	2.5e-07	2.5e-07	-1	2.A.1.	312	12	1.73	4	The Major Facilitator Superfamily (MFS)	>Oidma1_107636	gnl|TC-DB|Q96NT5	2.A.1.50.1	100	PF07690; PF00083; PF00083;	7e-021; 9e-009; 2e-005;	MFS_1 Major Facilitator Superfamily; Sugar_tr Sugar (and other) transporter; Sugar_tr Sugar (and other) transporter;						sp|O13714|YDZ7_SCHPO		5e-15
jgi|Oidma1|120235|	120160					MYC vs FLM UP				2.22717	0.151488	2.77694	0.00194703	1.28932	0.981922	1.03406	0.976949	9.92668	22.1084	27.5658	28.5048	466	Major facilitator superfamily MFS-1 ; Major facilitator superfamily ; MFS general substrate transporter	Oidma1_120160	120160	1.5e-47	1.5e-47	-1	2.A.1.	312	12	1.73	6	The Major Facilitator Superfamily (MFS)	>Oidma1_120160	gnl|TC-DB|P53322	2.A.1.14.11	100	PF07690;	3e-033;	MFS_1 Major Facilitator Superfamily;						sp|Q10097|YAOI_SCHPO		7e-52
jgi|Oidma1|120354|	120279					MYC vs FLM UP		MYC Cd vs FLM Cd UP		1.2745	1	26.7625	0.00614048	16.1562	0.017867	0.769401	0.898771	0.149469	0.190498	4.00016	3.07773	507	Major facilitator superfamily MFS-1 ; Major facilitator superfamily ; MFS general substrate transporter	Oidma1_120279	120279	1.5e-24	1.5e-24	-1	2.A.1.	312	12	1.73	5	The Major Facilitator Superfamily (MFS)	>Oidma1_120279	gnl|TC-DB|P53389	2.A.1.2.33	100	PF07690;	3e-028;	MFS_1 Major Facilitator Superfamily;						sp|P53389|HOL1_YEAST		7e-23
jgi|Oidma1|131366|	131291					MYC vs FLM UP		MYC Cd vs FLM Cd UP		0.604186	1	8.54214	0.0154271	27.0972	7.50575e-05	1.91658	0.555075	0.462608	0.279501	3.95166	7.57368	403	Major facilitator superfamily MFS-1 ; Major facilitator superfamily ; MFS general substrate transporter	Oidma1_131291	131291	0.00114	0.00114	-1	2.A.1.	312	12	1.73	7	The Major Facilitator Superfamily (MFS)	>Oidma1_131291	gnl|TC-DB|P0A0J7	2.A.1.2.10	60	PF07690;	3e-019;	MFS_1 Major Facilitator Superfamily;						sp|P53918|ESBP6_YEAST		1e-07
jgi|Oidma1|132937|	132862					MYC vs FLM UP		MYC Cd vs FLM Cd UP		1.62144	1	26.0199	0.0455731	36.0752	0.000599663	2.24805	0.437171	0.0846725	0.137292	2.20317	4.95282	610	Major facilitator superfamily MFS-1 ; Major facilitator superfamily ; MFS general substrate transporter	Oidma1_132862	132862	1.3e-36	1.3e-36	-1	2.A.1.	312	12	1.73	3	The Major Facilitator Superfamily (MFS)	>Oidma1_132862	gnl|TC-DB|P53943	2.A.1.2.36	100	PF07690;	4e-045;	MFS_1 Major Facilitator Superfamily;						sp|P53943|AQR1_YEAST		6e-35
jgi|Oidma1|135664|	135589					MYC vs FLM UP				1.72913	1	82.1005	0.0259403	23.9445	0.145355	0.5043	0.77235	0.0282074	0.0487744	2.31584	1.16788	511	Major facilitator superfamily MFS-1 ; Major facilitator superfamily ; MFS general substrate transporter	Oidma1_135589	135589	6.1e-21	6.1e-21	-1	2.A.1.	312	12	1.73	5	The Major Facilitator Superfamily (MFS)	>Oidma1_135589	gnl|TC-DB|P53389	2.A.1.2.33	100	PF07690;	2e-036;	MFS_1 Major Facilitator Superfamily;						sp|P53389|HOL1_YEAST		3e-19
jgi|Oidma1|109503|	109428						MYC vs FLM DOWN			0.710707	0.446532	0.434906	0.00119282	0.628608	5.6258e-06	1.02725	0.985739	60.4565	42.9669	26.2929	27.0093	752	Major facilitator superfamily MFS-1 ; Major facilitator superfamily ; MFS general substrate transporter	Oidma1_109428	109428	1.6e-20	1.6e-20	-1	2.A.1.	312	12	1.73	3	The Major Facilitator Superfamily (MFS)	>Oidma1_109428	gnl|TC-DB|P53389	2.A.1.2.33	100	PF07690;	1e-040;	MFS_1 Major Facilitator Superfamily;						sp|P53389|HOL1_YEAST		8e-19
jgi|Oidma1|136547|	136472					MYC vs FLM UP				2.03587	0.796095	3.99723	0.00304821	2.39204	0.0662707	1.21831	0.813467	3.23243	6.58079	12.9208	15.7415	481	Major facilitator superfamily MFS-1 ; Major facilitator superfamily ; MFS general substrate transporter	Oidma1_136472	136472	2.2e-20	2.2e-20	-1	2.A.1.	312	12	1.73	6	The Major Facilitator Superfamily (MFS)	>Oidma1_136472	gnl|TC-DB|P53389	2.A.1.2.33	100	PF07690;	9e-035;	MFS_1 Major Facilitator Superfamily;						sp|Q9USN4|YJA1_SCHPO		9e-23
jgi|Oidma1|112009|	111934						MYC vs FLM DOWN		MYC Cd vs FLM Cd DOWN	0.675284	0.161621	0.225343	6.48583e-08	0.371237	4.34727e-31	1.11248	0.846711	170.897	115.404	38.5105	42.8424	559	Amino acid permease-associated region ; Amino acid/polyamine transporter I	Oidma1_111934	111934	2.3e-53	2.3e-53	-1	2.A.3.	77	12.13	0.83	5	The Amino Acid-Polyamine-Organocation (APC) Family	>Oidma1_111934	gnl|TC-DB|Q9Y860	2.A.3.4.2	100	PF00324;	1e-008;	AA_permease Amino acid permease;						sp|O60113|YG64_SCHPO		5e-65
jgi|Oidma1|139089|	139014					MYC vs FLM UP				1.6066	1	15.4645	0.0461362	3.30827	0.514812	0.343694	0.624111	0.161698	0.259784	2.50058	0.859434	519	Major facilitator superfamily MFS-1 ; Major facilitator superfamily ; MFS general substrate transporter	Oidma1_139014	139014	4e-52	4e-52	-1	2.A.1.	312	12	1.73	6	The Major Facilitator Superfamily (MFS)	>Oidma1_139014	gnl|TC-DB|P15365	2.A.1.14.4	80	PF07690;	3e-030;	MFS_1 Major Facilitator Superfamily;						sp|P15365|DAL5_YEAST		2e-50
jgi|Oidma1|112699|	112624						MYC vs FLM DOWN			0.962516	1	0.421506	0.00176928	0.679477	0.427406	1.5516	0.07698	68.9467	66.3622	29.0614	45.0916	548	Sugar transporter ; General substrate transporter ; Sugar transporter ; Major facilitator superfamily ; Sugar transporter, conserved site ; MFS general substrate transporter	Oidma1_112624	112624	2.9e-117	2.9e-117	-1	2.A.1.	312	12	1.73	5	The Major Facilitator Superfamily (MFS)	>Oidma1_112624	gnl|TC-DB|P39932	2.A.1.1.38	100	PF00083; PF07690;	6e-129; 3e-012;	Sugar_tr Sugar (and other) transporter; MFS_1 Major Facilitator Superfamily;						sp|P39932|STL1_YEAST		1e-115
jgi|Oidma1|114723|	114648						MYC vs FLM DOWN			0.882769	0.697811	0.372498	3.79375e-09	0.560109	2.63985e-07	1.32738	0.60292	49.1409	43.3801	18.3049	24.2976	424							1.I.1					The Eukaryotic Nuclear Pore Complex (E-NPC) Family		gnl|TC-DB|G0S156	1.I.1.1.2					426	444	1048	9e-141	51.6	No hits found	-	-
jgi|Oidma1|115571|	115496						MYC vs FLM DOWN		MYC Cd vs FLM Cd DOWN	1.20139	0.843289	0.484101	3.23186e-25	0.49952	1.04179e-26	1.23966	0.5827	119.089	143.073	57.6511	71.4675	156	Ubiquitin-conjugating enzyme, E2 ; Ubiquitin-conjugating enzyme, E2 ; Ubiquitin-conjugating enzyme, E2 ; Ubiquitin-conjugating enzyme, E2 ; Ubiquitin-conjugating enzyme/RWD-like						3.A.16					The Endoplasmic Reticular Retrotranslocon (ER-RT) Family		gnl|TC-DB|C8ZEM9	3.A.16.1.2					165	130	161	1e-14	33.1	sp|Q4VBH4|UB2WA_DANRE	284	9e-32
jgi|Oidma1|115899|	115824						MYC vs FLM DOWN			0.859775	0.481735	0.403171	5.49518e-07	0.615771	6.13968e-20	1.31315	0.769239	178.997	153.897	72.1663	94.7654	150	Ubiquitin-conjugating enzyme, E2 ; Ubiquitin-conjugating enzyme, E2 ; Ubiquitin-conjugating enzyme, E2 ; Ubiquitin-conjugating enzyme, E2 ; Ubiquitin-conjugating enzyme, E2 ; Ubiquitin-conjugating enzyme/RWD-like						3.A.20					The Peroxisomal Protein Importer (PPI) Family		gnl|TC-DB|P62837	3.A.20.1.1					147	148	385	1e-48	50.7	sp|Q94A97|UBC35_ARATH	617	2e-82
jgi|Oidma1|116193|	116118			MYC Cd vs MYC UP						0.843617	0.00326002	0.586703	5.1342e-27	1.45321	0.0312773	2.08957	0	251.096	211.829	147.319	307.832	597	Major facilitator superfamily MFS-1 ; Major facilitator superfamily ; Sugar transporter, conserved site ; MFS general substrate transporter	Oidma1_116118	116118	7.1e-08	7.1e-08	-1	2.A.1.	312	12	1.73	6	The Major Facilitator Superfamily (MFS)	>Oidma1_116118	gnl|TC-DB|O52557	2.A.1.3.15	100	PF07690; PF00083;	1e-020; 2e-008;	MFS_1 Major Facilitator Superfamily; Sugar_tr Sugar (and other) transporter;						sp|Q10072|YAN6_SCHPO		1e-15
jgi|Oidma1|141191|	141116					MYC vs FLM UP		MYC Cd vs FLM Cd UP		0.98485	1	7.68704	2.32341e-06	11.0231	1.06792e-11	1.41226	0.364236	2.13287	2.10056	16.3954	23.1546	527	Major facilitator superfamily MFS-1 ; Major facilitator superfamily ; MFS general substrate transporter	Oidma1_141116	141116	3.1e-76	3.1e-76	-1	2.A.1.	312	12	1.73	6	The Major Facilitator Superfamily (MFS)	>Oidma1_141116	gnl|TC-DB|Q07824	2.A.1.2.16	100	PF07690;	1e-039;	MFS_1 Major Facilitator Superfamily;						sp|O74829|YN2F_SCHPO		9e-77
jgi|Oidma1|117057|	116982						MYC vs FLM DOWN			1.05174	1	0.444629	0.00207737	0.878961	0.311267	2.07912	0.190301	10.4153	10.9542	4.63094	9.62829	357	Sodium/calcium exchanger membrane region	Oidma1_116982	116982	3.4e-12	3.4e-12	-1	2.A.19.	18	11.11	1.1	7	The Ca2+:Cation Antiporter (CaCA) Family	>Oidma1_116982	gnl|TC-DB|Q0ZAI3	2.A.19.5.2	80	PF01699; PF01699; PF01699;	5e-042; 2e-017; 6e-023;	Na_Ca_ex Sodium/calcium exchanger protein; Na_Ca_ex Sodium/calcium exchanger protein; Na_Ca_ex Sodium/calcium exchanger protein;						sp|Q57556|Y091_METJA		8e-07
jgi|Oidma1|117182|	117107						MYC vs FLM DOWN		MYC Cd vs FLM Cd DOWN	0.776976	0.293388	0.428873	6.7242e-08	0.496306	9.92975e-09	0.899142	0.866777	56.0276	43.5321	24.0287	21.6053	220	Calcium-binding EF-hand ; Calcium-binding EF-hand ; Calcium-binding EF-hand ; Calcium-binding EF-hand ; Calcium-binding EF-hand						3.A.5					The General Secretory Pathway (Sec) Family		gnl|TC-DB|O75340	3.A.5.9.1					191	157	393	3e-48	43.3	sp|P12815|PDCD6_MOUSE	393	8e-47
jgi|Oidma1|117874|	117799						MYC vs FLM DOWN			0.812806	0.728256	0.452454	0.000103317	0.684254	0.0364925	1.22922	0.866219	17.081	13.8836	7.72838	9.49988	649	Major facilitator superfamily MFS-1 ; Major facilitator superfamily ; MFS general substrate transporter	Oidma1_117799	117799	3.2e-17	3.2e-17	-1	2.A.1.	312	12	1.73	5	The Major Facilitator Superfamily (MFS)	>Oidma1_117799	gnl|TC-DB|Q09752	2.A.1.48.3	100	PF07690; PF07690; PF00083;	7e-032; 4e-030; 4e-006;	MFS_1 Major Facilitator Superfamily; MFS_1 Major Facilitator Superfamily; Sugar_tr Sugar (and other) transporter;						sp|O42922|YBIH_SCHPO		9e-16
jgi|Oidma1|117912|	117837						MYC vs FLM DOWN			0.726454	0.183873	0.411694	1.45071e-07	0.704203	0.000868647	1.2426	0.722084	48.7687	35.4282	20.0778	24.9487	649	NPL4, zinc-binding putative ; NPL4 ; Polyubiquitin-tagged protein recognition complex, Npl4 component						3.A.16					The Endoplasmic Reticular Retrotranslocon (ER-RT) Family		gnl|TC-DB|P33755	3.A.16.1.2					580	625	1283	9e-171	42.7	sp|A7EGK5|NPL4_SCLS1	2428	0.0
jgi|Oidma1|147838|	147763					MYC vs FLM UP				1.35128	0.747691	2.06467	0.00207692	1.96205	0.000227319	1.28411	0.352649	31.267	42.2504	64.556	82.8974	511	Major facilitator superfamily MFS-1 ; Major facilitator superfamily ; MFS general substrate transporter	Oidma1_147763	147763	4.8e-58	4.8e-58	-1	2.A.1.	312	12	1.73	6	The Major Facilitator Superfamily (MFS)	>Oidma1_147763	gnl|TC-DB|P53322	2.A.1.14.11	100	PF07690;	5e-033;	MFS_1 Major Facilitator Superfamily;						sp|Q10097|YAOI_SCHPO		1e-62
jgi|Oidma1|170771|	170696					MYC vs FLM UP		MYC Cd vs FLM Cd UP		1.44553	1	18.6795	0.00046018	7.5877	7.7596e-05	0.587184	0.578033	0.919856	1.32968	17.1824	10.0892	500	Major facilitator superfamily MFS-1 ; Major facilitator superfamily ; MFS general substrate transporter	Oidma1_170696	170696	9.2e-46	9.2e-46	-1	2.A.1.	312	12	1.73	5	The Major Facilitator Superfamily (MFS)	>Oidma1_170696	gnl|TC-DB|P15365	2.A.1.14.4	100	PF07690;	6e-034;	MFS_1 Major Facilitator Superfamily;						sp|Q07904|YL004_YEAST		2e-66
jgi|Oidma1|173785|	173710					MYC vs FLM UP		MYC Cd vs FLM Cd UP		1.41852	1	8.64868	3.00261e-07	4.34897	0.000840288	0.713298	0.558009	2.04957	2.90736	17.7261	12.644	522	Major facilitator superfamily MFS-1 ; Major facilitator superfamily ; MFS general substrate transporter	Oidma1_173710	173710	5.6e-46	5.6e-46	-1	2.A.1.	312	12	1.73	4	The Major Facilitator Superfamily (MFS)	>Oidma1_173710	gnl|TC-DB|P15365	2.A.1.14.4	100	PF07690;	1e-034;	MFS_1 Major Facilitator Superfamily;						sp|Q07904|YL004_YEAST		2e-59
jgi|Oidma1|181650|	181575					MYC vs FLM UP		MYC Cd vs FLM Cd UP		1.92113	1	11.6454	0.000806686	5.38536	0.0115352	0.888415	0.925161	0.55024	1.05708	6.40778	5.69277	475	Major facilitator superfamily MFS-1 ; Major facilitator superfamily ; MFS general substrate transporter	Oidma1_181575	181575	4.9e-49	4.9e-49	-1	2.A.1.	312	12	1.73	5	The Major Facilitator Superfamily (MFS)	>Oidma1_181575	gnl|TC-DB|Q9RPP3	2.A.1.14.8	100	PF07690; PF07690;	2e-039; 4e-039;	MFS_1 Major Facilitator Superfamily; MFS_1 Major Facilitator Superfamily;						sp|Q10097|YAOI_SCHPO		5e-52
jgi|Oidma1|42920|	42845					MYC vs FLM UP		MYC Cd vs FLM Cd UP		1.39066	1	7.3197	0.0340639	6.47866	0.0147599	1.23087	0.892894	0.508994	0.707837	3.72569	4.58584	544	Major facilitator superfamily MFS-1 ; Major facilitator superfamily ; Sugar transporter, conserved site ; MFS general substrate transporter	Oidma1_42845	42845	9.5e-12	9.5e-12	-1	2.A.1.	312	12	1.73	6	The Major Facilitator Superfamily (MFS)	>Oidma1_42845	gnl|TC-DB|O69070	2.A.1.3.29	100	PF07690; PF07690; PF00083;	3e-028; 6e-023; 4e-007;	MFS_1 Major Facilitator Superfamily; MFS_1 Major Facilitator Superfamily; Sugar_tr Sugar (and other) transporter;						sp|Q00357|TOXA_COCCA		4e-15
jgi|Oidma1|45054|	44979			MYC Cd vs MYC UP		MYC vs FLM UP		MYC Cd vs FLM Cd UP		0.944644	1	3.99868	0.0106965	9.11418	7.98298e-10	2.15312	0.00966199	2.63888	2.4928	10.552	22.7199	522	Major facilitator superfamily MFS-1 ; Major facilitator superfamily ; Sugar transporter, conserved site ; MFS general substrate transporter	Oidma1_44979	44979	2.4e-12	2.4e-12	-1	2.A.1.	312	12	1.73	8	The Major Facilitator Superfamily (MFS)	>Oidma1_44979	gnl|TC-DB|Q09752	2.A.1.48.3	100	PF07690; PF07690; PF07690; PF00083;	5e-021; 1e-013; 2e-008; 4e-006;	MFS_1 Major Facilitator Superfamily; MFS_1 Major Facilitator Superfamily; MFS_1 Major Facilitator Superfamily; Sugar_tr Sugar (and other) transporter;						sp|Q10072|YAN6_SCHPO		4e-17
jgi|Oidma1|104286|	104211					MYC vs FLM UP				1.87502	0.192209	4.0091	0.0261271	0.934975	0.153092	0.43728	0.28824	11.5706	21.6951	46.3877	20.2844	559	Major facilitator superfamily MFS-1 ; Major facilitator superfamily ; Sugar transporter, conserved site ; MFS general substrate transporter	Oidma1_104211	104211	5.7e-68	5.7e-68	-1	2.A.1.	312	12	1.73	8	The Major Facilitator Superfamily (MFS)	>Oidma1_104211	gnl|TC-DB|P40474	2.A.1.2.31	100	PF07690;	6e-054;	MFS_1 Major Facilitator Superfamily;						sp|P40474|YIM1_YEAST		3e-66
jgi|Oidma1|135660|	135585					MYC vs FLM UP		MYC Cd vs FLM Cd UP		0.961403	1	38.486	0	25.4885	0	0.636717	3.2812e-07	2.8562	2.74596	109.924	69.9903	565	Major facilitator superfamily MFS-1 ; Major facilitator superfamily ; Sugar transporter, conserved site ; MFS general substrate transporter	Oidma1_135585	135585	5.1e-08	5.1e-08	-1	2.A.1.	312	12	1.73	7	The Major Facilitator Superfamily (MFS)	>Oidma1_135585	gnl|TC-DB|O23492	2.A.1.1.62	100	PF07690;	8e-019;	MFS_1 Major Facilitator Superfamily;						sp|O74395|STR1_SCHPO		9e-12
jgi|Oidma1|169652|	169577					MYC vs FLM UP		MYC Cd vs FLM Cd UP		1.13208	1	8.56583	1.73064e-11	5.36739	2.23374e-07	0.709366	0.409735	3.48109	3.94087	29.8184	21.1522	525	Major facilitator superfamily MFS-1 ; Major facilitator superfamily ; Sugar transporter, conserved site ; MFS general substrate transporter	Oidma1_169577	169577	4.1e-20	4.1e-20	-1	2.A.1.	312	12	1.73	8	The Major Facilitator Superfamily (MFS)	>Oidma1_169577	gnl|TC-DB|Q09752	2.A.1.48.3	100	PF07690; PF07690;	1e-018; 2e-013;	MFS_1 Major Facilitator Superfamily; MFS_1 Major Facilitator Superfamily;						sp|Q09752|FNX1_SCHPO		2e-18
jgi|Oidma1|120635|	120560							MYC Cd vs FLM Cd UP		0.988119	1	2.24722	0.322415	2.04494	0.00670281	0.899178	0.895719	58.0027	57.3136	130.345	117.203	617	Amino acid permease-associated region ; Amino acid/polyamine transporter I ; Amino acid permease, fungi ; Amino acid permease, conserved site	Oidma1_120560	120560	7.5e-93	7.5e-93	-1	2.A.3.	77	12.13	0.83	4	The Amino Acid-Polyamine-Organocation (APC) Family	>Oidma1_120560	gnl|TC-DB|P19145	2.A.3.10.2	100	PF00324;	1e-177;	AA_permease Amino acid permease;						sp|P19145|GAP1_YEAST		4e-91
jgi|Oidma1|30814|	30739					MYC vs FLM UP				1.05074	1	9.2739	0.00628462	5.94289	0.0537102	0.673336	0.772948	0.518208	0.544504	4.80582	3.23593	517	Major facilitator superfamily MFS-1 ; MFS general substrate transporter	Oidma1_30739	30739	6.6e-55	6.6e-55	-1	2.A.1.	312	12	1.73	5	The Major Facilitator Superfamily (MFS)	>Oidma1_30739	gnl|TC-DB|P15365	2.A.1.14.4	100	PF07690;	3e-025;	MFS_1 Major Facilitator Superfamily;						sp|P15365|DAL5_YEAST		3e-53
jgi|Oidma1|120888|	120813				MYC Cd vs MYC DOWN		MYC vs FLM DOWN		MYC Cd vs FLM Cd DOWN	1.06716	1	0.0447269	1.51678e-19	0.0153215	1.01847e-33	0.365563	0.0057761	723.458	772.047	32.358	11.8289	484	Blood group Rhesus C/E and D polypeptide ; Rh-like protein/ammonium transporter ; Ammonium transporter ; Ammonium transporter ; Rh-like protein/ammonium transporter	Oidma1_120813	120813	3.2e-165	3.2e-165	-1	1.A.11.	19	10.58	2.54	6	The Ammonia Transporter Channel (Amt) Family	>Oidma1_120813	gnl|TC-DB|Q8NKD5	1.A.11.3.3	100	PF00909;	7e-167;	Ammonium_transp Ammonium Transporter Family;						sp|Q9C0V1|AMT1_SCHPO		2e-161
jgi|Oidma1|40596|	40521					MYC vs FLM UP		MYC Cd vs FLM Cd UP		0.646598	0.973634	33.7723	0.00838499	16.1852	0	0.309879	0.355863	2.82808	1.82863	95.5109	29.5968	365	Major facilitator superfamily MFS-1 ; MFS general substrate transporter	Oidma1_40521	40521	2.5e-18	2.5e-18	-1	2.A.1.	312	12	1.73	6	The Major Facilitator Superfamily (MFS)	>Oidma1_40521	gnl|TC-DB|P40474	2.A.1.2.31	60	PF07690; PF07690;	1e-018; 3e-013;	MFS_1 Major Facilitator Superfamily; MFS_1 Major Facilitator Superfamily;						sp|P40474|YIM1_YEAST		1e-16
jgi|Oidma1|122611|	122536								MYC Cd vs FLM Cd DOWN	1.05366	1	0.679495	0.0363544	0.491087	0.000188488	0.761502	0.677644	18.2111	19.1882	12.3743	9.42308	465	Major facilitator superfamily MFS-1 ; Major facilitator superfamily ; MFS general substrate transporter	Oidma1_122536	122536	1.4e-24	1.4e-24	-1	2.A.1.	312	12	1.73	6	The Major Facilitator Superfamily (MFS)	>Oidma1_122536	gnl|TC-DB|Q08777	2.A.1.13.4	100	PF07690;	4e-036;	MFS_1 Major Facilitator Superfamily;						sp|Q08268|MCH4_YEAST		8e-27
jgi|Oidma1|123473|	123398						MYC vs FLM DOWN			0.790851	0.983405	0.426553	0.0346082	0.59472	0.00530537	1.10264	0.879811	30.774	24.3377	13.1267	14.4741	298	Mitochondrial substrate carrier ; Mitochondrial substrate carrier ; Mitochondrial substrate carrier	Oidma1_123398	123398	6e-65	6e-65	-1	2.A.29.	72	4.42	1.35	4	The Mitochondrial Carrier (MC) Family	>Oidma1_123398	gnl|TC-DB|P38152	2.A.29.7.3	100	PF00153; PF00153; PF00153; PF00153; PF00153;	5e-062; 6e-009; 2e-007; 6e-021; 1e-026;	Mito_carr Mitochondrial carrier protein; Mito_carr Mitochondrial carrier protein; Mito_carr Mitochondrial carrier protein; Mito_carr Mitochondrial carrier protein; Mito_carr Mitochondrial carrier protein;						sp|O13844|YFG5_SCHPO		4e-91
jgi|Oidma1|125571|	125496						MYC vs FLM DOWN			0.810219	1	0.389959	0.0418345	0.513391	3.21956e-07	1.06667	0.951801	45.4072	36.7898	17.707	18.8876	1206	ABC transporter-like ; ABC transporter-like ; ABC transporter, transmembrane region ; AAA+ ATPase, core ; ABC transporter-like ; ABC transporter, transmembrane region, type 1 ; ABC transporter-like ; ABC transporter, transmembrane region, type 1	Oidma1_125496	125496	1e-51	1e-51	-1	3.A.1.	876	4.31	3.92	4	The ATP-binding Cassette (ABC) Superfamily	>Oidma1_125496	gnl|TC-DB|P39109	3.A.1.208.11	100	PF00005; PF00005; PF00664;	2e-065; 6e-032; 2e-020;	ABC_tran ABC transporter; ABC_tran ABC transporter; ABC_membrane ABC transporter transmembrane region;						sp|Q9LYS2|MRP14_ARATH		2e-84
jgi|Oidma1|44098|	44023					MYC vs FLM UP				1.46605	1	18.2073	0.0320812	8.16909	0.114832	0.657775	0.867967	0.144959	0.212517	2.6393	1.73607	519	Major facilitator superfamily MFS-1 ; MFS general substrate transporter	Oidma1_44023	44023	1.1e-14	1.1e-14	-1	2.A.1.	312	12	1.73	4	The Major Facilitator Superfamily (MFS)	>Oidma1_44023	gnl|TC-DB|P53389	2.A.1.2.33	100	PF07690;	6e-022;	MFS_1 Major Facilitator Superfamily;						sp|P53389|HOL1_YEAST		6e-13
jgi|Oidma1|125719|	125644								MYC Cd vs FLM Cd DOWN	1.19338	1	0.545312	4.05854e-08	0.421154	1.94113e-12	0.92167	0.82424	42.9098	51.2078	23.3992	21.5664	784	Oligopeptide transporter OPT superfamily ; Oligopeptide transporter OPT superfamily	Oidma1_125644	125644	3.4e-61	3.4e-61	-1	2.A.67.	10	15.5	1.43	4	The Oligopeptide Transporter (OPT) Family	>Oidma1_125644	gnl|TC-DB|Q06593	2.A.67.1.4	100	PF03169;	1e-214;	OPT OPT oligopeptide transporter protein;						sp|Q9SUA4|OPT5_ARATH		3e-73
jgi|Oidma1|45839|	45764					MYC vs FLM UP				2.17545	1	33.2925	0.00458956	4.88338	0.306789	0.319098	0.392274	0.116938	0.254392	3.89314	1.24229	508	Major facilitator superfamily MFS-1 ; MFS general substrate transporter	Oidma1_45764	45764	5.9e-24	5.9e-24	-1	2.A.1.	312	12	1.73	6	The Major Facilitator Superfamily (MFS)	>Oidma1_45764	gnl|TC-DB|Q8CE47	2.A.1.28.2	40	PF07690;	5e-019;	MFS_1 Major Facilitator Superfamily;						sp|Q6P3R2|MFS7B_XENTR		3e-24
jgi|Oidma1|126311|	126236								MYC Cd vs FLM Cd DOWN	1.24686	1	1.10431	0.680241	0.234891	0.0405031	0.265213	0.450729	2.6651	3.32301	2.94309	0.780545	510	Tetracycline resistance protein, TetB ; Major facilitator superfamily MFS-1 ; Major facilitator superfamily ; MFS general substrate transporter	Oidma1_126236	126236	2.6e-32	2.6e-32	-1	2.A.1.	312	12	1.73	7	The Major Facilitator Superfamily (MFS)	>Oidma1_126236	gnl|TC-DB|Q09752	2.A.1.48.3	100	PF07690; PF07690; PF00083;	3e-046; 7e-040; 2e-006;	MFS_1 Major Facilitator Superfamily; MFS_1 Major Facilitator Superfamily; Sugar_tr Sugar (and other) transporter;						sp|O42922|YBIH_SCHPO		6e-47
jgi|Oidma1|47025|	46950					MYC vs FLM UP		MYC Cd vs FLM Cd UP		0.924961	1	5.61282	5.96157e-05	3.36454	0.0251592	0.554457	0.18874	2.7562	2.54937	15.47	8.57746	525	Major facilitator superfamily MFS-1 ; MFS general substrate transporter	Oidma1_46950	46950	6.8e-07	6.8e-07	-1	2.A.1.	312	12	1.73	6	The Major Facilitator Superfamily (MFS)	>Oidma1_46950	gnl|TC-DB|O94528	2.A.1.2.35	100	PF07690;	5e-027;	MFS_1 Major Facilitator Superfamily;						sp|O94528|CAF5_SCHPO		3e-05
jgi|Oidma1|47868|	47793					MYC vs FLM UP		MYC Cd vs FLM Cd UP		1.55753	0.353026	5.47186	0.00722366	3.78691	0	1.07792	0.99485	41.9401	65.3232	229.491	247.373	464	Major facilitator superfamily MFS-1 ; MFS general substrate transporter	Oidma1_47793	47793	1.2e-44	1.2e-44	-1	2.A.1.	312	12	1.73	5	The Major Facilitator Superfamily (MFS)	>Oidma1_47793	gnl|TC-DB|P0C105	2.A.1.7.2	100	PF07690;	6e-014;	MFS_1 Major Facilitator Superfamily;						sp|Q2YIJ8|GLUP_BRUA2		6e-43
jgi|Oidma1|106908|	106833					MYC vs FLM UP		MYC Cd vs FLM Cd UP		2.53687	1	172.088	0	74.0976	0	1.09232	0.861935	0.294468	0.747027	50.6746	55.3529	572	Major facilitator superfamily MFS-1 ; MFS general substrate transporter	Oidma1_106833	106833	1.9e-18	1.9e-18	-1	2.A.1.	312	12	1.73	6	The Major Facilitator Superfamily (MFS)	>Oidma1_106833	gnl|TC-DB|P53389	2.A.1.2.33	100	PF07690;	1e-027;	MFS_1 Major Facilitator Superfamily;						sp|P53389|HOL1_YEAST		9e-17
jgi|Oidma1|128507|	128432	FLM Cd vs FLM UP					MYC vs FLM DOWN		MYC Cd vs FLM Cd DOWN	2.62122	3.48297e-05	0.278336	0.00436257	0.0989065	9.08945e-97	0.931448	0.883589	70.7346	185.411	19.688	18.3383	569	Major facilitator superfamily MFS-1 ; Major facilitator superfamily ; MFS general substrate transporter	Oidma1_128432	128432	1.4e-37	1.4e-37	-1	2.A.1.	312	12	1.73	6	The Major Facilitator Superfamily (MFS)	>Oidma1_128432	gnl|TC-DB|O59726	2.A.1.48.4	100	PF07690; PF00083;	1e-042; 3e-006;	MFS_1 Major Facilitator Superfamily; Sugar_tr Sugar (and other) transporter;						sp|Q00357|TOXA_COCCA		3e-81
jgi|Oidma1|129603|	129528						MYC vs FLM DOWN		MYC Cd vs FLM Cd DOWN	1.69273	0.525559	0.235273	0.00159031	0.161752	5.8148e-11	1.16377	0.947286	21.131	35.7691	4.97154	5.78571	575	Tetracycline resistance protein, TetA ; Tetracycline resistance protein, TetB ; Major facilitator superfamily MFS-1 ; Major facilitator superfamily ; MFS general substrate transporter	Oidma1_129528	129528	5.6e-18	5.6e-18	-1	2.A.1.	312	12	1.73	6	The Major Facilitator Superfamily (MFS)	>Oidma1_129528	gnl|TC-DB|Q04301	2.A.1.48.1	100	PF07690; PF07690; PF00083;	7e-035; 6e-032; 3e-007;	MFS_1 Major Facilitator Superfamily; MFS_1 Major Facilitator Superfamily; Sugar_tr Sugar (and other) transporter;						sp|Q00357|TOXA_COCCA		4e-21
jgi|Oidma1|130068|	129993						MYC vs FLM DOWN			0.650768	0.0759879	0.484686	5.39765e-06	0.621294	5.08577e-07	0.834186	0.744386	84.3673	54.9035	40.8916	34.1112	823	ABC transporter-like ; ABC transporter-like ; ABC transporter, N-terminal ; AAA+ ATPase, core ; ABC transporter-like ; ABC transporter, transmembrane region, type 1 ; ABC transporter-like ; ABC transporter, transmembrane region, type 1	Oidma1_129993	129993	4.4e-120	4.4e-120	-1	3.A.1.	876	4.31	3.92	4	The ATP-binding Cassette (ABC) Superfamily	>Oidma1_129993	gnl|TC-DB|P33897	3.A.1.203.3	100	PF00005;	6e-032;	ABC_tran ABC transporter;						sp|Q61285|ABCD2_MOUSE		4e-121
jgi|Oidma1|130426|	130351							MYC Cd vs FLM Cd UP		0.84977	1	1.11733	0.603879	2.31313	0.0273543	1.75922	0.201089	9.45266	8.03259	10.5617	18.5804	712	K+ potassium transporter ; K+ potassium transporter	Oidma1_130351	130351	2.9e-213	2.9e-213	-1	2.A.72.	7	13	0.53	5	The K+ Uptake Permease (KUP) Family	>Oidma1_130351	gnl|TC-DB|O74724	2.A.72.3.2	100	PF02705; PF02705; PF02705;	1e-309; 5e-288; 3e-023;	K_trans K; K_trans K; K_trans K;						sp|Q6VVA6|HAK1_ORYSJ		3e-123
jgi|Oidma1|107999|	107924					MYC vs FLM UP		MYC Cd vs FLM Cd UP		0.879122	1	593.202	7.72557e-07	1022.17	0	1.51485	0.294251	0.0398592	0.0350411	23.6446	35.8181	448	Major facilitator superfamily MFS-1 ; MFS general substrate transporter	Oidma1_107924	107924	1.2e-12	1.2e-12	-1	2.A.1.	312	12	1.73	6	The Major Facilitator Superfamily (MFS)	>Oidma1_107924	gnl|TC-DB|P53985	2.A.1.13.1	80	PF07690;	8e-018;	MFS_1 Major Facilitator Superfamily;						sp|Q08268|MCH4_YEAST		6e-29
jgi|Oidma1|112133|	112058					MYC vs FLM UP		MYC Cd vs FLM Cd UP		1.45936	0.973779	5.59614	1.61916e-10	3.28754	2.17865e-05	0.857324	0.660067	5.97285	8.71654	33.4249	28.656	466	Major facilitator superfamily MFS-1 ; MFS general substrate transporter	Oidma1_112058	112058	7.4e-10	7.4e-10	-1	2.A.1.	312	12	1.73	5	The Major Facilitator Superfamily (MFS)	>Oidma1_112058	gnl|TC-DB|P28873	2.A.1.2.6	100	PF07690;	1e-027;	MFS_1 Major Facilitator Superfamily;						sp|Q9HDX4|YKN1_SCHPO		2e-09
jgi|Oidma1|131298|	131223							MYC Cd vs FLM Cd UP		1.66196	1	7.34425	0.0561108	5.74511	0.0350661	1.30009	0.879239	0.449332	0.746773	3.3	4.2903	477	MFS general substrate transporter	Oidma1_131223	131223	1.9e-16	1.9e-16	-1	2.A.2.	15	11.73	0.77	6	The Glycoside-Pentoside-Hexuronide (GPH):Cation Symporter Family	>Oidma1_131223	gnl|TC-DB|Q9SXM0	2.A.2.4.2	100	PF07690;	2e-008;	MFS_1 Major Facilitator Superfamily;						sp|O80605|SUC3_ARATH		5e-13
jgi|Oidma1|128292|	128217					MYC vs FLM UP		MYC Cd vs FLM Cd UP		0.504522	0.996112	160.912	0.00239237	232.121	0	0.72779	0.764679	1.2655	0.638471	203.633	148.202	511	Major facilitator superfamily MFS-1 ; MFS general substrate transporter	Oidma1_128217	128217	2e-59	2e-59	-1	2.A.1.	312	12	1.73	4	The Major Facilitator Superfamily (MFS)	>Oidma1_128217	gnl|TC-DB|P15365	2.A.1.14.4	100	PF07690;	3e-024;	MFS_1 Major Facilitator Superfamily;						sp|P15365|DAL5_YEAST		9e-58
jgi|Oidma1|133539|	133464					MYC vs FLM UP				1.55267	1	9.95678	0.029412	3.39382	0.295333	0.529236	0.756528	0.366462	0.568995	3.64879	1.93107	438	Major facilitator superfamily MFS-1 ; MFS general substrate transporter	Oidma1_133464	133464	2e-17	2e-17	-1	2.A.1.	312	12	1.73	7	The Major Facilitator Superfamily (MFS)	>Oidma1_133464	gnl|TC-DB|O70324	2.A.1.13.3	80	PF07690;	9e-020;	MFS_1 Major Facilitator Superfamily;						sp|P36032|MCH2_YEAST		4e-63
jgi|Oidma1|136608|	136533					MYC vs FLM UP				2.88884	1	39.6995	0.0353514	6.64554	0.324597	0.483581	0.755268	0.0596809	0.172409	2.3693	1.14575	493	Major facilitator superfamily MFS-1 ; MFS general substrate transporter	Oidma1_136533	136533	2.1e-34	2.1e-34	-1	2.A.2.	15	11.73	0.77	5	The Glycoside-Pentoside-Hexuronide (GPH):Cation Symporter Family	>Oidma1_136533	gnl|TC-DB|O14091	2.A.2.6.1	100	PF07690; PF07690;	4e-011; 5e-010;	MFS_1 Major Facilitator Superfamily; MFS_1 Major Facilitator Superfamily;						sp|O14091|SUT1_SCHPO		1e-32
jgi|Oidma1|132741|	132666						MYC vs FLM DOWN			0.884576	0.943886	0.465734	0.00145122	0.602389	1.95217e-09	1.14413	0.872754	74.9238	66.2758	34.8945	39.9238	359	Porin, eukaryotic type						1.B.8					The Mitochondrial and Plastid Porin (MPP) Family		gnl|TC-DB|P23644	1.B.8.2.1					387	359	785	1e-102	44.8	sp|P24391|TOM40_NEUCR	1167	1e-159
jgi|Oidma1|136978|	136903					MYC vs FLM UP		MYC Cd vs FLM Cd UP		1.54903	0.880694	2.75628	0.0172199	2.55236	0.00208081	1.43443	0.397715	6.53617	10.1247	18.0155	25.842	542	Major facilitator superfamily MFS-1 ; MFS general substrate transporter	Oidma1_136903	136903	1.4e-31	1.4e-31	-1	2.A.1.	312	12	1.73	6	The Major Facilitator Superfamily (MFS)	>Oidma1_136903	gnl|TC-DB|P53322	2.A.1.14.11	80	PF07690;	3e-035;	MFS_1 Major Facilitator Superfamily;						sp|Q07904|YL004_YEAST		9e-57
jgi|Oidma1|53080|	53005					MYC vs FLM UP				6.30451	1	414.359	0.000239282	18.0093	0.0669446	0.274014	0.127318	0.0165851	0.104561	6.8722	1.88308	441	Major facilitator superfamily MFS-1 ; SANT, DNA-binding ; MFS general substrate transporter	Oidma1_53005	53005	1.8e-13	1.8e-13	-1	2.A.1.	312	12	1.73	7	The Major Facilitator Superfamily (MFS)	>Oidma1_53005	gnl|TC-DB|Q12235	2.A.1.14.20	40	PF07690;	7e-014;	MFS_1 Major Facilitator Superfamily;						sp|Q12235|YL055_YEAST		8e-12
jgi|Oidma1|166227|	166152					MYC vs FLM UP				0.88019	1	2.36373	0.0113204	1.73263	0.0969213	0.645184	0.00679332	22.635	19.9231	53.5032	34.5194	545	Major facilitator superfamily MFS-1 ; SANT, DNA-binding ; MFS general substrate transporter						2.A.1					The Major Facilitator Superfamily (MFS)		gnl|TC-DB|P40445	2.A.1.14.38					542	499	1000	4e-130	38.1	sp|P40445|YIQ6_YEAST	1000	1e-128
jgi|Oidma1|134691|	134616						MYC vs FLM DOWN			0.753156	0.182713	0.393356	2.14559e-10	0.67639	0.00238956	1.29508	0.643283	35.2935	26.5815	13.8829	17.9795	652	Amino acid transporter, transmembrane	Oidma1_134616	134616	5.5e-78	5.5e-78	-1	2.A.18.	26	10.73	0.86	1	The Amino Acid/Auxin Permease (AAAP) Family	>Oidma1_134616	gnl|TC-DB|P47082	2.A.18.5.2	100	PF01490;	4e-064;	Aa_trans Transmembrane amino acid transporter protein;						sp|P47082|AVT1_YEAST		3e-76
jgi|Oidma1|134745|	134670								MYC Cd vs FLM Cd DOWN	1.49347	0.0365194	0.82046	1.31947e-05	0.407921	3.10501e-10	0.742532	0.742023	63.1252	94.2756	51.7917	38.457	94	Zinc finger, Tim10/DDP-type						3.A.8					The Mitochondrial Protein Translocase (MPT) Family		gnl|TC-DB|P57744	3.A.8.1.1					87	87	166	4e-17	36.8	sp|Q4IJW4|TIM8_GIBZE	270	2e-31
jgi|Oidma1|42605|	42530			MYC Cd vs MYC UP		MYC vs FLM UP		MYC Cd vs FLM Cd UP		0.905103	1	58.1502	2.05593e-05	140.38	2.49147e-11	2.185	0.0355011	0.134692	0.12191	7.83236	17.1138	364	Major intrinsic protein ; Major intrinsic protein ; Major intrinsic protein ; Major intrinsic protein	Oidma1_42530	42530	3.8e-19	3.8e-19	-1	1.A.8.	42	6.14	0.47	5	The Major Intrinsic Protein (MIP) Family	>Oidma1_42530	gnl|TC-DB|P43549	1.A.8.7.1	100	PF00230;	7e-013;	MIP Major intrinsic protein;						sp|Q9P7T9|YI7H_SCHPO		5e-18
jgi|Oidma1|164222|	164147	FLM Cd vs FLM UP				MYC vs FLM UP		MYC Cd vs FLM Cd UP		3.2174	1.423e-05	8.7054	0	5.34632	0	1.97593	0	38.6901	124.482	336.813	665.519	364	Major intrinsic protein ; Major intrinsic protein ; Major intrinsic protein ; Major intrinsic protein	Oidma1_164147	164147	6.9e-21	6.9e-21	-1	1.A.8.	42	6.14	0.47	5	The Major Intrinsic Protein (MIP) Family	>Oidma1_164147	gnl|TC-DB|P43549	1.A.8.7.1	100	PF00230;	8e-014;	MIP Major intrinsic protein;						sp|Q9P7T9|YI7H_SCHPO		2e-19
jgi|Oidma1|170627|	170552					MYC vs FLM UP		MYC Cd vs FLM Cd UP		1.23011	1	12.0319	3.65223e-13	5.86821	1.2149e-08	0.599953	0.0626539	3.2656	4.01705	39.2913	23.5729	577	MFS general substrate transporter	Oidma1_170552	170552	7.6e-23	7.6e-23	-1	2.A.1.	312	12	1.73	3	The Major Facilitator Superfamily (MFS)	>Oidma1_170552	gnl|TC-DB|P25568	2.A.1.24.1	20	PF07690;	3e-008;	MFS_1 Major Facilitator Superfamily;						sp|A2QTX8|AT222_ASPNC		1e-21
jgi|Oidma1|178782|	178707					MYC vs FLM UP				0.922673	1	4.90627	0.00726579	2.19012	0.473611	0.411874	0.168053	1.51224	1.39531	7.41947	3.05589	134	MFS general substrate transporter	Oidma1_178707	178707	5.5e-05	5.5e-05	-1	2.A.1.	312	12	1.73	3	The Major Facilitator Superfamily (MFS)	>Oidma1_178707	gnl|TC-DB|O60669	2.A.1.13.5	40									sp|P36032|MCH2_YEAST		3e-17
jgi|Oidma1|92396|	92321					MYC vs FLM UP		MYC Cd vs FLM Cd UP		1.07399	1	4.55234	0.000791767	2.29039	8.99074e-12	0.540348	0.190755	61.8751	66.4531	281.677	152.203	50	Mitochondrial substrate carrier ; Mitochondrial substrate carrier ; Mitochondrial substrate carrier	Oidma1_92321	92321	5.8e-16	5.8e-16	-1	2.A.29.	72	4.42	1.35	1	The Mitochondrial Carrier (MC) Family	>Oidma1_92321	gnl|TC-DB|P18239	2.A.29.1.7	100	PF00153;	2e-013;	Mito_carr Mitochondrial carrier protein;						sp|P02723|ADT_NEUCR		3e-18
jgi|Oidma1|46001|	45926					MYC vs FLM UP				0.791709	1	40.2728	0.0200665	11.9713	0.0648156	0.23534	0.372649	0.237802	0.18827	9.57696	2.25384	562	Multicopper oxidase, type 1 ; Multicopper oxidase, type 2 ; Multicopper oxidase, type 3 ; Cupredoxin						2.A.108					The Iron/Lead Transporter (ILT) Family		gnl|TC-DB|Q09920	2.A.108.1.5					622	492	461	3e-50	31.7	sp|Q96WM9|LAC2_BOTFU	1330	1e-177
jgi|Oidma1|136292|	136217					MYC vs FLM UP		MYC Cd vs FLM Cd UP		0.772764	1	15.238	2.37336e-08	20.3901	2.87051e-11	1.03404	0.94135	1.18035	0.912129	17.9861	18.5984	560	Multicopper oxidase, type 1 ; Multicopper oxidase, type 2 ; Multicopper oxidase, type 3 ; Cupredoxin						2.A.108					The Iron/Lead Transporter (ILT) Family		gnl|TC-DB|Q09920	2.A.108.1.5					622	495	490	3e-54	30.1	sp|Q96WM9|LAC2_BOTFU	1415	0.0
jgi|Oidma1|44886|	44811					MYC vs FLM UP				0.508946	1	6.29441	0.0347351	5.41678	0.197655	0.437984	0.531478	0.684916	0.348585	4.31114	1.88821	560	Multicopper oxidase, type 1 ; Multicopper oxidase, type 2 ; Multicopper oxidase, type 3 ; Multicopper oxidase, copper-binding site ; Cupredoxin						2.A.108					The Iron/Lead Transporter (ILT) Family		gnl|TC-DB|Q1P9T1	2.A.108.1.7					628	543	488	6e-54	30.4	sp|Q96WM9|LAC2_BOTFU	1921	0.0
jgi|Oidma1|44374|	44299					MYC vs FLM UP				1.18277	1	27.193	0.0240321	15.0409	0.0685401	0.654212	0.867896	0.102956	0.121773	2.79967	1.83158	656	Multicopper oxidase, type 1 ; Multicopper oxidase, type 2 ; Multicopper oxidase, type 3 ; Multicopper oxidase, copper-binding site ; Multicopper oxidase, copper-binding site ; Cupredoxin						2.A.108					The Iron/Lead Transporter (ILT) Family		gnl|TC-DB|Q09920	2.A.108.1.5					622	497	475	2e-51	30.2	sp|Q96WM9|LAC2_BOTFU	2044	0.0
jgi|Oidma1|136856|	136781						MYC vs FLM DOWN		MYC Cd vs FLM Cd DOWN	0.841381	0.722635	0.204003	5.01604e-07	0.216527	6.20554e-51	0.893036	0.35034	1013.17	852.466	206.691	184.582	523	Amino acid permease-associated region ; Amino acid/polyamine transporter I	Oidma1_136781	136781	2e-139	2e-139	-1	2.A.3.	77	12.13	0.83	6	The Amino Acid-Polyamine-Organocation (APC) Family	>Oidma1_136781	gnl|TC-DB|AAX81451	2.A.3.10.22	100	PF00324;	2e-147;	AA_permease Amino acid permease;						sp|Q9P768|YI26_SCHPO		3e-121
jgi|Oidma1|137657|	137582					MYC vs FLM UP		MYC Cd vs FLM Cd UP		1.54432	1	14.0303	0.00398219	14.6603	1.08996e-08	1.61367	0.489556	0.670109	1.03487	9.40182	15.1715	565	Multicopper oxidase, type 1 ; Multicopper oxidase, type 2 ; Multicopper oxidase, type 3 ; Multicopper oxidase, copper-binding site ; Multicopper oxidase, copper-binding site ; Cupredoxin						2.A.108					The Iron/Lead Transporter (ILT) Family		gnl|TC-DB|Q09920	2.A.108.1.5					622	499	462	3e-50	30.3	sp|Q96WM9|LAC2_BOTFU	1206	8e-159
jgi|Oidma1|137185|	137110				MYC Cd vs MYC DOWN	MYC vs FLM UP		MYC Cd vs FLM Cd UP		3.04207	1	1693.63	0	268.36	4.35024e-05	0.482024	0.00248038	0.059831	0.18201	101.331	48.8442	178	NADH ubiquinone oxidoreductase, 20 kDa subunit ; NADH dehydrogenase (ubiquinone), 20 kDa subunit ; NADH dehydrogenase (ubiquinone), 20 kDa subunit	Oidma1_137110	137110	6.2e-73	6.2e-73	-1	3.D.1.	213	3.08	5.13	1	The Proton-translocating NADH Dehydrogenase (NDH) Family	>Oidma1_137110	gnl|TC-DB|O47950	3.D.1.6.2	100	PF01058;	4e-064;	Oxidored_q6 NADH ubiquinone oxidoreductase;						sp|O47950|NDUS7_NEUCR		2e-71
jgi|Oidma1|180705|	180630					MYC vs FLM UP		MYC Cd vs FLM Cd UP		0.651405	1	6.74634	0.00867381	25.2802	0.000299579	2.44098	0.268495	0.846755	0.551581	5.7125	13.9441	170	NLP/P60						3.A.7					The Type IV (Conjugal DNA-Protein Transfer or VirB) Secretory Pathway (IVSP) Family		gnl|TC-DB|Q15HU6	3.A.7.14.2					334	94	131	1e-09	37.2	sp|O53168|RIPA_MYCTU	182	6e-15
jgi|Oidma1|37092|	37017				MYC Cd vs MYC DOWN	MYC vs FLM UP				0.902828	1	2.59384	0.00213994	1.13169	0.741262	0.393904	3.90641e-05	10.1553	9.16845	26.3411	10.3759	783	Oligopeptide transporter OPT superfamily ; Tetrapeptide transporter, OPT1/isp4 ; Oligopeptide transporter OPT superfamily	Oidma1_37017	37017	4.9e-145	4.9e-145	-1	2.A.67.	10	15.5	1.43	4	The Oligopeptide Transporter (OPT) Family	>Oidma1_37017	gnl|TC-DB|P40900	2.A.67.1.2	80	PF03169; PF03169; PF03169;	4e-212; 4e-161; 5e-049;	OPT OPT oligopeptide transporter protein; OPT OPT oligopeptide transporter protein; OPT OPT oligopeptide transporter protein;						sp|P40900|ISP4_SCHPO		2e-143
jgi|Oidma1|137680|	137605						MYC vs FLM DOWN			0.598078	0.448194	0.45619	0.00559315	0.686042	0.20971	0.899421	0.943856	9.12723	5.4588	4.16375	3.74496	506	Major facilitator superfamily MFS-1 ; Major facilitator superfamily ; MFS general substrate transporter	Oidma1_137605	137605	7.8e-77	7.8e-77	-1	2.A.1.	312	12	1.73	6	The Major Facilitator Superfamily (MFS)	>Oidma1_137605	gnl|TC-DB|P15365	2.A.1.14.4	100	PF07690;	2e-025;	MFS_1 Major Facilitator Superfamily;						sp|P15365|DAL5_YEAST		4e-75
jgi|Oidma1|137947|	137872								MYC Cd vs FLM Cd DOWN	2.35427	0.382854	1.46249	0.853398	0.101671	0.000270643	0.163666	0.307408	4.90805	11.5549	7.17796	1.17479	348	Protein kinase, core ; Serine/threonine protein kinase-related ; Tyrosine protein kinase ; Serine/threonine protein kinase ; Protein kinase, core ; Protein kinase ATP binding, conserved site ; Serine/threonine protein kinase, active site ; MAP kinase, conserved site ; Protein kinase-like						1.I.1					The Eukaryotic Nuclear Pore Complex (E-NPC) Family		gnl|TC-DB|P06493	1.I.1.1.3					297	288	473	3e-57	36.1	sp|Q8TGA9|HOG1_BLUGR	1380	0.0
jgi|Oidma1|137991|	137916							MYC Cd vs FLM Cd UP		0.0327786	0.908635	5.22603	0.181724	139.269	0.0456234	0.873521	0.955706	0.431246	0.0141357	2.25371	1.96866	511	Amino acid permease-associated region ; Amino acid/polyamine transporter I	Oidma1_137916	137916	2e-43	2e-43	-1	2.A.3.	77	12.13	0.83	6	The Amino Acid-Polyamine-Organocation (APC) Family	>Oidma1_137916	gnl|TC-DB|P19807	2.A.3.4.1	100	PF00324;	2e-005;	AA_permease Amino acid permease;						sp|P19807|HNM1_YEAST		9e-42
jgi|Oidma1|43421|	43346					MYC vs FLM UP		MYC Cd vs FLM Cd UP		2.41886	0.644581	20.446	0	5.18333	6.70555e-07	0.613213	0.00966199	1.7694	4.27992	36.1771	22.1843	837	Oligopeptide transporter OPT superfamily ; Tetrapeptide transporter, OPT1/isp4 ; Oligopeptide transporter OPT superfamily ; Tubulin/FtsZ, C-terminal	Oidma1_43346	43346	2.4e-169	2.4e-169	-1	2.A.67.	10	15.5	1.43	5	The Oligopeptide Transporter (OPT) Family	>Oidma1_43346	gnl|TC-DB|Q06593	2.A.67.1.4	80	PF03169;	2e-201;	OPT OPT oligopeptide transporter protein;						sp|Q06593|OPT2_YEAST		1e-142
jgi|Oidma1|109005|	108930					MYC vs FLM UP		MYC Cd vs FLM Cd UP		1.40683	0.807003	2.91439	4.81064e-11	2.05322	0.00191382	0.991127	0.862939	29.1955	41.0731	85.087	84.332	509	Permease for cytosine/purines, uracil, thiamine, allantoin	Oidma1_108930	108930	6.9e-57	6.9e-57	-1	2.A.39.	12	12.17	0.37	5	The Nucleobase:Cation Symporter-1 (NCS1) Family	>Oidma1_108930	gnl|TC-DB|P17064	2.A.39.2.1	80									sp|P40039|FCY21_YEAST		5e-57
jgi|Oidma1|149149|	149074				MYC Cd vs MYC DOWN	MYC vs FLM UP				1.57768	0.924275	4.02431	0.000270803	1.15747	0.918535	0.453771	0.0275701	4.653	7.34094	18.7251	8.49692	369	Protein of unknown function DUF250						2.A.7					The Drug/Metabolite Transporter (DMT) Superfamily		gnl|TC-DB|Q7Z769	2.A.7.9.15					313	294	319	4e-34	30.3	sp|Q1JQ66|S35E3_DANRE	327	8e-34
jgi|Oidma1|158433|	158358					MYC vs FLM UP		MYC Cd vs FLM Cd UP		0.891462	1	21.5387	0.0331056	7.36261	1.16439e-13	0.30473	0.488043	5.54729	4.9452	119.482	36.4096	475	Protein of unknown function DUF607						1.A.77					The Mg2+/Ca2+ Uniporter (MCU) Family		gnl|TC-DB|Q7S4I4	1.A.77.1.5					493	446	1060	6e-141	52.7	No hits found	-	-
jgi|Oidma1|139420|	139345								MYC Cd vs FLM Cd DOWN	1.46186	1	0.795038	0.295069	0.206568	0.0332946	0.379822	0.507775	4.34654	6.35402	3.45566	1.31254	547	Major facilitator superfamily MFS-1 ; Major facilitator superfamily ; MFS general substrate transporter	Oidma1_139345	139345	1.5e-73	1.5e-73	-1	2.A.1.	312	12	1.73	6	The Major Facilitator Superfamily (MFS)	>Oidma1_139345	gnl|TC-DB|Q07824	2.A.1.2.16	100	PF07690;	2e-040;	MFS_1 Major Facilitator Superfamily;						sp|O74829|YN2F_SCHPO		4e-81
jgi|Oidma1|139530|	139455						MYC vs FLM DOWN			0.999737	1	0.482437	8.37651e-08	0.594431	7.84627e-07	1.23182	0.699579	48.2212	48.2085	23.2637	28.6567	214	CHD5-like protein						3.A.19					The TMS Recognition/Insertion Complex (TRC) Family		gnl|TC-DB|A2QHQ3	3.A.19.1.2					196	179	459	4e-58	45.8	sp|A7EF54|GET1_SCLS1	669	2e-88
jgi|Oidma1|42582|	42507			MYC Cd vs MYC UP		MYC vs FLM UP		MYC Cd vs FLM Cd UP		0.236334	1	458.803	0	4547.44	0	2.34243	0	0.153984	0.0363917	70.6484	165.489	507	Rh-like protein/ammonium transporter ; Ammonium transporter ; Ammonium transporter ; Rh-like protein/ammonium transporter	Oidma1_42507	42507	1.6e-114	1.6e-114	-1	1.A.11.	19	10.58	2.54	5	The Ammonia Transporter Channel (Amt) Family	>Oidma1_42507	gnl|TC-DB|Q8NKD5	1.A.11.3.3	100	PF00909;	2e-151;	Ammonium_transp Ammonium Transporter Family;						sp|Q9US00|AMT2_SCHPO		3e-124
jgi|Oidma1|139891|	139816								MYC Cd vs FLM Cd DOWN	0.622028	0.952288	0.310697	0.113883	0.294685	0.00307585	0.589971	0.447747	27.2274	16.9362	8.45947	4.99084	629	Sugar transporter ; General substrate transporter ; Sugar transporter ; Major facilitator superfamily ; Sugar transporter, conserved site ; MFS general substrate transporter	Oidma1_139816	139816	9.4e-59	9.4e-59	-1	2.A.1.	312	12	1.73	4	The Major Facilitator Superfamily (MFS)	>Oidma1_139816	gnl|TC-DB|Q8NJ22	2.A.1.1.33	100	PF00083; PF07690; PF07690;	1e-102; 2e-019; 5e-018;	Sugar_tr Sugar (and other) transporter; MFS_1 Major Facilitator Superfamily; MFS_1 Major Facilitator Superfamily;						sp|P23585|HXT2_YEAST		7e-42
jgi|Oidma1|139944|	139869						MYC vs FLM DOWN		MYC Cd vs FLM Cd DOWN	0.693298	0.324353	0.355099	7.84621e-06	0.396334	1.39443e-05	0.773805	0.788538	28.0242	19.4291	9.95135	7.70041	574	DNA/RNA helicase, DEAD/DEAH box type, N-terminal ; DNA/RNA helicase, C-terminal ; DEAD-like helicase, N-terminal ; DNA/RNA helicase, C-terminal ; Helicase, superfamily 1 and 2, ATP-binding ; DNA/RNA helicase, C-terminal ; RNA helicase, ATP-dependent, DEAD-box, conserved site						1.I.1					The Eukaryotic Nuclear Pore Complex (E-NPC) Family		gnl|TC-DB|O00571	1.I.1.1.3					662	400	424	6e-45	32.5	sp|Q0UG00|MS116_PHANO	930	1e-117
jgi|Oidma1|140661|	140586						MYC vs FLM DOWN		MYC Cd vs FLM Cd DOWN	0.896703	0.80347	0.259154	7.54461e-12	0.221341	1.73467e-12	0.765864	0.682726	67.6583	60.6694	17.534	13.4286	316	Cystinosin/ERS1p repeat ; Cystinosin/ERS1p repeat						2.A.43					The Lysosomal Cystine Transporter (LCT) Family		gnl|TC-DB|P38279	2.A.43.2.7					296	310	443	5e-53	33.9	sp|P38279|YPQ3_YEAST	443	1e-51
jgi|Oidma1|138715|	138640			MYC Cd vs MYC UP		MYC vs FLM UP		MYC Cd vs FLM Cd UP		0.988615	1	11.2537	0.0244841	148.738	0	13.0663	0	0.328035	0.3243	3.69161	48.2358	556	Rh-like protein/ammonium transporter ; Ammonium transporter ; Ammonium transporter ; Rh-like protein/ammonium transporter	Oidma1_138640	138640	9.5e-116	9.5e-116	-1	1.A.11.	19	10.58	2.54	5	The Ammonia Transporter Channel (Amt) Family	>Oidma1_138640	gnl|TC-DB|P40260	1.A.11.3.1	100	PF00909;	2e-149;	Ammonium_transp Ammonium Transporter Family;						sp|P53390|MEP3_YEAST		5e-116
jgi|Oidma1|141607|	141532						MYC vs FLM DOWN		MYC Cd vs FLM Cd DOWN	0.905612	0.851183	0.322748	3.57375e-07	0.41984	3.53795e-23	1.17805	0.739849	108.295	98.0734	34.952	41.1751	1351	ABC transporter-like ; ABC transporter-like ; ABC transporter, transmembrane region ; AAA+ ATPase, core ; ABC transporter-like ; ABC transporter, transmembrane region, type 1 ; ABC transporter-like ; ABC transporter, transmembrane region, type 1	Oidma1_141532	141532	1.2e-221	1.2e-221	-1	3.A.1.	876	4.31	3.92	3	The ATP-binding Cassette (ABC) Superfamily	>Oidma1_141532	gnl|TC-DB|Q90Z35	3.A.1.201.9	100	PF00005; PF00005; PF00005; PF00664; PF00664; PF00664;	1e-124; 7e-064; 1e-061; 1e-100; 4e-050; 1e-048;	ABC_tran ABC transporter; ABC_tran ABC transporter; ABC_tran ABC transporter; ABC_membrane ABC transporter transmembrane region; ABC_membrane ABC transporter transmembrane region; ABC_membrane ABC transporter transmembrane region;						sp|Q9QY30|ABCBB_MOUSE		6e-223
jgi|Oidma1|141896|	141821						MYC vs FLM DOWN		MYC Cd vs FLM Cd DOWN	1.02383	0.998829	0.417254	1.51721e-23	0.429516	1.48101e-29	1.05392	0.944858	130.691	133.805	54.5313	57.4714	255	Der1-like						3.A.16					The Endoplasmic Reticular Retrotranslocon (ER-RT) Family		gnl|TC-DB|Q9BUN8	3.A.16.1.1					251	258	206	2e-19	30.2	No hits found	-	-
jgi|Oidma1|142259|	142184								MYC Cd vs FLM Cd DOWN	0.985906	1	0.579081	1.73085e-07	0.465325	1.07109e-08	0.792232	0.675137	40.01	39.4461	23.169	18.3553	538	Amino acid transporter, transmembrane	Oidma1_142184	142184	4.4e-17	4.4e-17	-1	2.A.18.	26	10.73	0.86	3	The Amino Acid/Auxin Permease (AAAP) Family	>Oidma1_142184	gnl|TC-DB|Q91XR7	2.A.18.6.8	100	PF01490;	1e-075;	Aa_trans Transmembrane amino acid transporter protein;						sp|P39981|AVT2_YEAST		9e-70
jgi|Oidma1|142777|	142702						MYC vs FLM DOWN			1.04377	1	0.489562	0.000110219	0.509658	2.18837e-06	1.08662	0.950478	31.7137	33.1018	15.5258	16.8706	397							1.B.8					The Mitochondrial and Plastid Porin (MPP) Family		gnl|TC-DB|B2W864	1.B.8.6.5					435	216	637	3e-79	57.4	sp|A7F1G7|MDM10_SCLS1	1607	0.0
jgi|Oidma1|142802|	142727						MYC vs FLM DOWN			0.750049	0.251053	0.474245	2.92427e-07	0.6117	0.000447118	0.967443	0.969243	33.688	25.2676	15.9764	15.4562	1672	ATPase, P-type, K/Mg/Cd/Cu/Zn/Na/Ca/Na/H-transporter ; Haloacid dehalogenase-like hydrolase ; ATPase, P-type, K/Mg/Cd/Cu/Zn/Na/Ca/Na/H-transporter ; Phospholipid-translocating P-type ATPase, flippase ; ATPase, P-type, K/Mg/Cd/Cu/Zn/Na/Ca/Na/H-transporter	Oidma1_142727	142727	4.6e-90	4.6e-90	-1	3.A.3.	111	8.67	2.57	0	The P-type ATPase (P-ATPase) Superfamily	>Oidma1_142727	gnl|TC-DB|Q29449	3.A.3.8.1	100	PF00702; PF00122;	4e-012; 1e-008;	Hydrolase haloacid dehalogenase-like hydrolase; E1-E2_ATPase E1-E2 ATPase;						sp|Q12674|ATC8_YEAST		3e-138
jgi|Oidma1|142858|	142783							MYC Cd vs FLM Cd UP		0.860092	1	1.90298	0.354729	2.70274	0.0374428	1.22156	0.885761	4.84484	4.16701	9.21965	11.2623	1622	ABC transporter-like ; ABC transporter-like ; AAA+ ATPase, core ; ABC transporter-like ; ABC transporter-like	Oidma1_142783	142783	8.5e-41	8.5e-41	-1	3.A.1.	876	4.31	3.92	3	The ATP-binding Cassette (ABC) Superfamily	>Oidma1_142783	gnl|TC-DB|P78363	3.A.1.211.2	100	PF00005; PF00005; PF00005;	3e-079; 8e-034; 2e-046;	ABC_tran ABC transporter; ABC_tran ABC transporter; ABC_tran ABC transporter;						sp|Q8R420|ABCA3_MOUSE		3e-38
jgi|Oidma1|61374|	61299					MYC vs FLM UP		MYC Cd vs FLM Cd UP		1.74564	0.973634	10.9717	1.37297e-10	3.99806	0.00017189	0.636105	0.260985	2.19493	3.83155	24.0821	15.3188	515	Sugar transporter ; General substrate transporter ; Major facilitator superfamily ; MFS general substrate transporter	Oidma1_61299	61299	1.5e-51	1.5e-51	-1	2.A.1.	312	12	1.73	6	The Major Facilitator Superfamily (MFS)	>Oidma1_61299	gnl|TC-DB|P07921	2.A.1.1.9	100	PF00083; PF07690;	2e-063; 2e-022;	Sugar_tr Sugar (and other) transporter; MFS_1 Major Facilitator Superfamily;						sp|P07921|LACP_KLULA		7e-50
jgi|Oidma1|143403|	143328						MYC vs FLM DOWN		MYC Cd vs FLM Cd DOWN	0.727303	0.0690722	0.137006	1.73095e-19	0.152076	4.49383e-21	0.807306	0.557299	293.379	213.375	40.1945	32.4493	494	Blood group Rhesus C/E and D polypeptide ; Rh-like protein/ammonium transporter ; Ammonium transporter ; Rh-like protein/ammonium transporter	Oidma1_143328	143328	3.7e-124	3.7e-124	-1	1.A.11.	19	10.58	2.54	6	The Ammonia Transporter Channel (Amt) Family	>Oidma1_143328	gnl|TC-DB|Q9M6N7	1.A.11.2.2	100	PF00909;	2e-073;	Ammonium_transp Ammonium Transporter Family;						sp|Q9M6N7|AMT2_ARATH		2e-122
jgi|Oidma1|145736|	145661						MYC vs FLM DOWN		MYC Cd vs FLM Cd DOWN	0.829253	0.982496	0.457476	0.0185258	0.434192	6.70477e-05	0.787046	0.665859	40.3584	33.4673	18.463	14.5313	387	Mitochondrial carrier protein ; Mitochondrial substrate carrier ; Mitochondrial substrate carrier ; Lipocalin ; Mitochondrial substrate carrier	Oidma1_145661	145661	9.4e-24	9.4e-24	-1	2.A.29.	72	4.42	1.35	2	The Mitochondrial Carrier (MC) Family	>Oidma1_145661	gnl|TC-DB|Q01888	2.A.29.12.1	100	PF00153; PF00153; PF00153; PF00153;	1e-075; 5e-032; 3e-019; 9e-026;	Mito_carr Mitochondrial carrier protein; Mito_carr Mitochondrial carrier protein; Mito_carr Mitochondrial carrier protein; Mito_carr Mitochondrial carrier protein;						sp|P38702|LEU5_YEAST		1e-84
jgi|Oidma1|146344|	146269			MYC Cd vs MYC UP				MYC Cd vs FLM Cd UP		1.49504	0.959705	1.6252	0.662833	3.32703	2.67083e-05	3.06057	1.12726e-05	5.53916	8.28125	9.00223	27.552	600	Tetracycline resistance protein, TetB ; Major facilitator superfamily MFS-1 ; Major facilitator superfamily ; MFS general substrate transporter	Oidma1_146269	146269	1.8e-43	1.8e-43	-1	2.A.1.	312	12	1.73	6	The Major Facilitator Superfamily (MFS)	>Oidma1_146269	gnl|TC-DB|Q09752	2.A.1.48.3	100	PF07690;	3e-039;	MFS_1 Major Facilitator Superfamily;						sp|Q9HE13|YI32_SCHPO		7e-45
jgi|Oidma1|146573|	146498				MYC Cd vs MYC DOWN					0.584147	0.231273	0.721046	0.0223968	0.601486	0.00262303	0.487287	0.000149643	60.4608	35.318	43.595	21.2433	635	TGF-beta receptor, type I/II extracellular region ; MFS general substrate transporter	Oidma1_146498	146498	8.4e-39	8.4e-39	-1	2.A.17.	15	11.4	2.94	4	The Proton-dependent Oligopeptide Transporter (POT) Family	>Oidma1_146498	gnl|TC-DB|P46031	2.A.17.2.1	100	PF00854; PF07690;	3e-034; 4e-009;	PTR2 POT family; MFS_1 Major Facilitator Superfamily;						sp|P46030|PTR2_CANAL		7e-101
jgi|Oidma1|147457|	147382						MYC vs FLM DOWN		MYC Cd vs FLM Cd DOWN	0.93566	1	0.303258	0.00243682	0.404079	5.72933e-08	1.24673	0.880467	269.706	252.353	81.7905	101.971	341							1.A.14					The Calcium Transporter A (CaTA) (formerly the Testis-Enhanced Gene Transfer (TEGT) Family		gnl|TC-DB|U3IVC3	1.A.14.1.5					345	226	272	2e-27	32.7	sp|Q9H3K2|GHITM_HUMAN	278	8e-27
jgi|Oidma1|35904|	35829					MYC vs FLM UP				0.998484	1	162.809	0.0275968	38.9472	0.291696	0.238857	0.504799	0.0159455	0.0159213	2.59607	0.620091	493	Sugar transporter ; General substrate transporter ; Major facilitator superfamily ; Sugar transporter, conserved site ; MFS general substrate transporter	Oidma1_35829	35829	2.8e-23	2.8e-23	-1	2.A.1.	312	12	1.73	6	The Major Facilitator Superfamily (MFS)	>Oidma1_35829	gnl|TC-DB|P11636	2.A.1.1.7	100	PF00083; PF07690;	1e-089; 2e-023;	Sugar_tr Sugar (and other) transporter; MFS_1 Major Facilitator Superfamily;						sp|Q4U3U4|QAY_NEUTR		7e-23
jgi|Oidma1|148087|	148012							MYC Cd vs FLM Cd UP		1.42205	1	5.55182	0.302232	11.5318	0.0184435	2.95378	0.471983	0.213654	0.303828	1.18617	3.50368	532	Major facilitator superfamily MFS-1 ; Major facilitator superfamily ; MFS general substrate transporter	Oidma1_148012	148012	2.9e-53	2.9e-53	-1	2.A.1.	312	12	1.73	6	The Major Facilitator Superfamily (MFS)	>Oidma1_148012	gnl|TC-DB|Q08299	2.A.1.16.2	100	PF07690;	7e-020;	MFS_1 Major Facilitator Superfamily;						sp|O74395|STR1_SCHPO		2e-77
jgi|Oidma1|136096|	136021			MYC Cd vs MYC UP		MYC vs FLM UP		MYC Cd vs FLM Cd UP		2.39889	0.971541	34.0639	0.000333781	139.662	4.20711e-07	9.83544	6.32898e-05	0.660004	1.58328	22.4823	221.124	556	Sugar transporter ; General substrate transporter ; Major facilitator superfamily ; Sugar transporter, conserved site ; Sugar transporter, conserved site ; MFS general substrate transporter	Oidma1_136021	136021	3.5e-62	3.5e-62	-1	2.A.1.	312	12	1.73	6	The Major Facilitator Superfamily (MFS)	>Oidma1_136021	gnl|TC-DB|P11636	2.A.1.1.7	100	PF00083; PF07690; PF07690;	1e-066; 2e-012; 8e-012;	Sugar_tr Sugar (and other) transporter; MFS_1 Major Facilitator Superfamily; MFS_1 Major Facilitator Superfamily;						sp|P15325|QUTD_EMENI		3e-64
jgi|Oidma1|40773|	40698					MYC vs FLM UP				2.59218	1	20.1244	0.00329999	2.60438	0.523674	0.335465	0.327293	0.228781	0.593042	4.60407	1.54451	519	Sugar transporter ; General substrate transporter ; Sugar transporter ; Major facilitator superfamily ; MFS general substrate transporter	Oidma1_40698	40698	4.2e-70	4.2e-70	-1	2.A.1.	312	12	1.73	6	The Major Facilitator Superfamily (MFS)	>Oidma1_40698	gnl|TC-DB|P39932	2.A.1.1.38	100	PF00083; PF07690;	2e-091; 1e-026;	Sugar_tr Sugar (and other) transporter; MFS_1 Major Facilitator Superfamily;						sp|P39932|STL1_YEAST		2e-68
jgi|Oidma1|167393|	167318			MYC Cd vs MYC UP		MYC vs FLM UP		MYC Cd vs FLM Cd UP		1.06309	1	9.33458	0.000400293	17.9521	1.28702e-13	2.04451	0.0290895	1.34099	1.42559	12.5176	25.5924	531	Sugar transporter ; General substrate transporter ; Sugar transporter ; Major facilitator superfamily ; MFS general substrate transporter	Oidma1_167318	167318	1.7e-82	1.7e-82	-1	2.A.1.	312	12	1.73	6	The Major Facilitator Superfamily (MFS)	>Oidma1_167318	gnl|TC-DB|P07921	2.A.1.1.9	100	PF00083; PF07690;	5e-103; 2e-031;	Sugar_tr Sugar (and other) transporter; MFS_1 Major Facilitator Superfamily;						sp|P07921|LACP_KLULA		8e-81
jgi|Oidma1|149191|	149116						MYC vs FLM DOWN		MYC Cd vs FLM Cd DOWN	0.562844	0.159331	0.118308	1.99972e-06	0.203097	9.09312e-13	0.966222	0.9764	73.4881	41.3623	8.69425	8.40058	593	Xanthine/uracil/vitamin C permease						2.A.40					The Nucleobase/Ascorbate Transporter (NAT) or Nucleobase:Cation Symporter-2 (NCS2) Family		gnl|TC-DB|Q7Z8R3	2.A.40.7.1					580	576	1893	0.0	64.1	sp|O94300|YOOH_SCHPO	1746	0.0
jgi|Oidma1|150231|	150156								MYC Cd vs FLM Cd DOWN	1.37024	1	0.0245269	0.0599158	0.00557618	0.000891633	0.311523	0.502509	119.636	163.93	2.93431	0.914103	505	Major facilitator superfamily MFS-1 ; Major facilitator superfamily ; MFS general substrate transporter	Oidma1_150156	150156	1.2e-29	1.2e-29	-1	2.A.1.	312	12	1.73	8	The Major Facilitator Superfamily (MFS)	>Oidma1_150156	gnl|TC-DB|O59726	2.A.1.48.4	80	PF07690;	1e-036;	MFS_1 Major Facilitator Superfamily;						sp|Q00357|TOXA_COCCA		6e-57
jgi|Oidma1|105148|	105073					MYC vs FLM UP		MYC Cd vs FLM Cd UP		2.44478	0.544748	5.32111	0.00101908	2.76292	0.0147963	1.26942	0.780241	2.09795	5.12904	11.1634	14.1711	530	Sugar transporter ; General substrate transporter ; Sugar transporter ; Major facilitator superfamily ; Protein kinase ATP binding, conserved site ; Sugar transporter, conserved site ; Sugar transporter, conserved site ; MFS general substrate transporter	Oidma1_105073	105073	4.9e-106	4.9e-106	-1	2.A.1.	312	12	1.73	6	The Major Facilitator Superfamily (MFS)	>Oidma1_105073	gnl|TC-DB|P30605	2.A.1.1.8	100	PF00083; PF07690;	1e-111; 5e-031;	Sugar_tr Sugar (and other) transporter; MFS_1 Major Facilitator Superfamily;						sp|Q10286|ITR1_SCHPO		7e-125
jgi|Oidma1|151538|	151463						MYC vs FLM DOWN		MYC Cd vs FLM Cd DOWN	0.864082	0.823421	0.440877	2.48443e-05	0.483903	1.50048e-05	0.94841	0.955706	28.5699	24.6867	12.5958	11.946	382	Mitochondrial carrier protein ; Mitochondrial substrate carrier ; Mitochondrial substrate carrier ; Mitochondrial substrate carrier	Oidma1_151463	151463	1.5e-95	1.5e-95	-1	2.A.29.	72	4.42	1.35	3	The Mitochondrial Carrier (MC) Family	>Oidma1_151463	gnl|TC-DB|P38127	2.A.29.29.1	100	PF00153; PF00153; PF00153; PF00153;	4e-092; 1e-028; 5e-036; 9e-029;	Mito_carr Mitochondrial carrier protein; Mito_carr Mitochondrial carrier protein; Mito_carr Mitochondrial carrier protein; Mito_carr Mitochondrial carrier protein;						sp|P38127|RIM2_YEAST		7e-94
jgi|Oidma1|151733|	151658						MYC vs FLM DOWN			0.776898	0.145228	0.474915	1.50263e-08	0.716792	0.00297466	1.17258	0.914587	71.9483	55.8965	34.1694	40.0662	604	Protein of unknown function DUF300						2.A.82					The Organic Solute Transporter (OST) Family		gnl|TC-DB|Q9Y519	2.A.82.1.3					407	321	361	1e-37	30.2	No hits found	-	-
jgi|Oidma1|151946|	151871						MYC vs FLM DOWN			0.907666	0.655273	0.468878	4.47557e-36	0.552482	3.47041e-05	1.06951	0.878385	155.657	141.285	72.9842	78.0573	418	Protein of unknown function DUF914, eukaryotic						2.A.7					The Drug/Metabolite Transporter (DMT) Superfamily		gnl|TC-DB|Q4WUA9	2.A.7.24.11					435	401	1209	3e-165	58.1	sp|O59785|YCN8_SCHPO	902	2e-116
jgi|Oidma1|32731|	32656			MYC Cd vs MYC UP		MYC vs FLM UP		MYC Cd vs FLM Cd UP		1.36982	0.89633	5.09944	0	10.3959	3.99235e-06	2.79254	0.00834863	15.2444	20.882	77.7378	217.086	497	Sugar transporter ; General substrate transporter ; Sugar transporter ; Major facilitator superfamily ; Sugar transporter, conserved site ; MFS general substrate transporter	Oidma1_32656	32656	2.2e-76	2.2e-76	-1	2.A.1.	312	12	1.73	6	The Major Facilitator Superfamily (MFS)	>Oidma1_32656	gnl|TC-DB|P39932	2.A.1.1.38	100	PF00083; PF07690;	5e-107; 3e-016;	Sugar_tr Sugar (and other) transporter; MFS_1 Major Facilitator Superfamily;						sp|P39932|STL1_YEAST		1e-74
jgi|Oidma1|152550|	152475						MYC vs FLM DOWN			0.895442	0.645393	0.435419	8.18222e-07	0.615666	1.79761e-05	1.26612	0.872754	41.5709	37.2244	18.1008	22.9178	421	WD40 repeat ; WD40 repeat ; WD40 repeat ; WD40 repeat ; WD40 repeat-like						1.I.1					The Eukaryotic Nuclear Pore Complex (E-NPC) Family		gnl|TC-DB|G0S450	1.I.1.1.2					538	349	648	2e-79	42.1	No hits found	-	-
jgi|Oidma1|152740|	152665						MYC vs FLM DOWN			0.869434	0.326492	0.433922	3.01439e-14	0.517889	1.15765e-09	1.03768	0.95115	63.4191	55.1387	27.5189	28.5557	415	AAA ATPase, core ; AAA+ ATPase, core ; AAA ATPase, conserved site						3.A.25					The Symbiont-specific ERAD-like Machinery (SELMA) Family		gnl|TC-DB|P46468	3.A.25.2.1					1229	313	436	4e-47	34.5	sp|P28737|MSP1_YEAST	837	2e-108
jgi|Oidma1|153216|	153141								MYC Cd vs FLM Cd DOWN	2.49541	0.389952	1.5869	0.62842	0.328039	0.0134072	0.515842	0.387804	22.8203	56.946	36.2136	18.6805	534	Sugar transporter ; General substrate transporter ; Sugar transporter ; Major facilitator superfamily ; Sugar transporter, conserved site ; Sugar transporter, conserved site ; MFS general substrate transporter	Oidma1_153141	153141	1.9e-126	1.9e-126	-1	2.A.1.	312	12	1.73	6	The Major Facilitator Superfamily (MFS)	>Oidma1_153141	gnl|TC-DB|P49374	2.A.1.1.39	100	PF00083; PF00083; PF00083; PF07690;	1e-110; 3e-077; 4e-032; 8e-024;	Sugar_tr Sugar (and other) transporter; Sugar_tr Sugar (and other) transporter; Sugar_tr Sugar (and other) transporter; MFS_1 Major Facilitator Superfamily;						sp|P49374|HGT1_KLULA		9e-125
jgi|Oidma1|153350|	153275						MYC vs FLM DOWN		MYC Cd vs FLM Cd DOWN	1.12314	1	0.479345	0.0379519	0.431029	0.00150019	1.00993	0.9699	1540.8	1730.53	738.577	745.909	582	Sugar transporter ; General substrate transporter ; Sugar transporter ; Major facilitator superfamily ; Sugar transporter, conserved site ; Sugar transporter, conserved site ; MFS general substrate transporter	Oidma1_153275	153275	6e-137	6e-137	-1	2.A.1.	312	12	1.73	6	The Major Facilitator Superfamily (MFS)	>Oidma1_153275	gnl|TC-DB|Q8J0V1	2.A.1.1.57	100	PF00083; PF07690; PF07690;	6e-130; 2e-019; 8e-019;	Sugar_tr Sugar (and other) transporter; MFS_1 Major Facilitator Superfamily; MFS_1 Major Facilitator Superfamily;						sp|P38695|HXT5_YEAST		1e-75
jgi|Oidma1|153890|	153815						MYC vs FLM DOWN			0.759582	0.861527	0.482944	0.0353584	0.778197	0.0138521	1.22396	0.872754	126.882	96.3771	61.2769	75.0004	348	Mitochondrial substrate carrier ; Mitochondrial substrate carrier ; Mitochondrial substrate carrier	Oidma1_153815	153815	6.5e-13	6.5e-13	-1	2.A.29.	72	4.42	1.35	3	The Mitochondrial Carrier (MC) Family	>Oidma1_153815	gnl|TC-DB|O43772	2.A.29.8.3	100	PF00153; PF00153; PF00153; PF00153; PF00153;	1e-050; 6e-019; 4e-021; 5e-006; 2e-006;	Mito_carr Mitochondrial carrier protein; Mito_carr Mitochondrial carrier protein; Mito_carr Mitochondrial carrier protein; Mito_carr Mitochondrial carrier protein; Mito_carr Mitochondrial carrier protein;						sp|O59674|YB8B_SCHPO		2e-29
jgi|Oidma1|154440|	154365						MYC vs FLM DOWN			0.893777	0.928989	0.428092	8.7317e-05	0.537849	1.10116e-07	1.12293	0.711922	103.915	92.8765	44.485	49.9535	629	ABC transporter-like ; ABC transporter-like ; AAA+ ATPase, core ; ABC transporter-like ; ABC transporter-like	Oidma1_154365	154365	1.7e-55	1.7e-55	-1	3.A.1.	876	4.31	3.92	0	The ATP-binding Cassette (ABC) Superfamily	>Oidma1_154365	gnl|TC-DB|Q83XH1	3.A.1.121.4	100	PF00005; PF00005;	2e-090; 2e-031;	ABC_tran ABC transporter; ABC_tran ABC transporter;						sp|P40024|ARB1_YEAST		8e-243
jgi|Oidma1|154466|	154391						MYC vs FLM DOWN			0.844457	0.0208109	0.365461	1.14418e-38	0.587735	1.16667e-14	1.35806	0.0397098	129.606	109.447	47.366	64.3257	241	Ubiquitin-conjugating enzyme, E2 ; Ubiquitin-conjugating enzyme, E2 ; Ubiquitin-conjugating enzyme, C-terminal fungi ; Ubiquitin-conjugating enzyme, E2 ; Ubiquitin-associated/translation elongation factor EF1B, N-terminal, eukaryote ; Ubiquitin-conjugating enzyme, E2 ; Ubiquitin-conjugating enzyme, E2 ; UBA-like ; Ubiquitin-conjugating enzyme/RWD-like						3.A.16					The Endoplasmic Reticular Retrotranslocon (ER-RT) Family		gnl|TC-DB|E7Q288	3.A.16.1.2					215	218	485	2e-61	44.0	sp|O74810|UBC1_SCHPO	490	9e-61
jgi|Oidma1|154590|	154515								MYC Cd vs FLM Cd DOWN	0.580306	0.776747	0.359588	0.0718557	0.417023	0.00188903	0.672996	0.793339	45.1461	26.1985	16.234	10.9254	573	Major facilitator superfamily MFS-1 ; Major facilitator superfamily ; MFS general substrate transporter	Oidma1_154515	154515	2.1e-25	2.1e-25	-1	2.A.1.	312	12	1.73	6	The Major Facilitator Superfamily (MFS)	>Oidma1_154515	gnl|TC-DB|O94528	2.A.1.2.35	100	PF07690;	2e-028;	MFS_1 Major Facilitator Superfamily;						sp|Q10487|MFS1_SCHPO		3e-22
jgi|Oidma1|156120|	156045						MYC vs FLM DOWN			1.06409	1	0.428828	2.82575e-13	0.522093	6.57169e-09	1.29551	0.538236	51.5892	54.8954	22.1229	28.6605	346	Claudin						1.H.1					The Claudin Tight Junction (Claudin1) Family		gnl|TC-DB|F5H8T9	1.H.1.4.1					315	287	748	3e-98	49.5	No hits found	-	-
jgi|Oidma1|156232|	156157						MYC vs FLM DOWN			0.920991	0.943886	0.47723	3.81288e-05	0.557984	1.9974e-06	1.07684	0.939683	40.3687	37.1792	19.2651	20.7454	449	Zinc/iron permease	Oidma1_156157	156157	4.5e-20	4.5e-20	-1	2.A.5.	19	7.58	0.88	3	The Zinc (Zn2+)-Iron (Fe2+) Permease (ZIP) Family	>Oidma1_156157	gnl|TC-DB|P32804	2.A.5.1.1	80	PF02535;	2e-046;	Zip ZIP Zinc transporter;						sp|Q12436|ZRT2_YEAST		5e-23
jgi|Oidma1|156500|	156425						MYC vs FLM DOWN			0.769677	0.47377	0.398076	2.99502e-05	0.610772	1.23877e-08	1.18092	0.728031	86.8059	66.8125	34.5553	40.8072	545	Auxin efflux carrier						2.A.69					The Auxin Efflux Carrier (AEC) Family		gnl|TC-DB|B8MZ51	2.A.69.2.3					590	596	1504	0.0	55.9	No hits found	-	-
jgi|Oidma1|156542|	156467								MYC Cd vs FLM Cd DOWN	1.7098	0.000362948	0.654864	8.15103e-08	0.40195	6.91076e-11	1.04946	0.947218	60.6994	103.784	39.7499	41.716	95	Mitochondrial ribosome ; NADH dehydrogenase [ubiquinone] (complex I), alpha subcomplex, subunit 2						3.D.1					The H+ or Na+-translocating NADH Dehydrogenase (NDH) Family		gnl|TC-DB|Q07842	3.D.1.6.2					94	92	359	2e-46	69.6	sp|Q07842|NDUA2_NEUCR	359	6e-45
jgi|Oidma1|157113|	157038						MYC vs FLM DOWN		MYC Cd vs FLM Cd DOWN	0.821476	0.669964	0.306869	7.01721e-06	0.466081	3.47257e-13	1.24768	0.649012	79.3269	65.1651	24.343	30.3722	530	Amino acid permease-associated region ; Amino acid/polyamine transporter I	Oidma1_157038	157038	1.8e-63	1.8e-63	-1	2.A.3.	77	12.13	0.83	4	The Amino Acid-Polyamine-Organocation (APC) Family	>Oidma1_157038	gnl|TC-DB|P38090	2.A.3.10.19	100	PF00324; PF00324; PF00324;	4e-114; 2e-041; 9e-071;	AA_permease Amino acid permease; AA_permease Amino acid permease; AA_permease Amino acid permease;						sp|P38090|AGP2_YEAST		9e-62
jgi|Oidma1|157947|	157872						MYC vs FLM DOWN		MYC Cd vs FLM Cd DOWN	0.895083	0.887794	0.00783514	4.27923e-182	0.00619036	1.73807e-06	0.707184	0.849049	459.321	411.131	3.59885	2.54505	463	Major facilitator superfamily MFS-1 ; Major facilitator superfamily ; Peptidase S26A, signal peptidase I ; MFS general substrate transporter	Oidma1_157872	157872	1.3e-54	1.3e-54	-1	2.A.1.	312	12	1.73	6	The Major Facilitator Superfamily (MFS)	>Oidma1_157872	gnl|TC-DB|P32071	2.A.1.2.2	100	PF07690;	2e-055;	MFS_1 Major Facilitator Superfamily;						sp|Q9USN4|YJA1_SCHPO		9e-55
jgi|Oidma1|56614|	56539				MYC Cd vs MYC DOWN	MYC vs FLM UP		MYC Cd vs FLM Cd UP		1.24104	1	48.5446	9.93986e-08	10.418	0.016848	0.266334	0.00441468	0.249075	0.309112	12.0912	3.22031	495	Sugar transporter ; General substrate transporter ; Sugar transporter ; Major facilitator superfamily ; Sugar transporter, conserved site ; MFS general substrate transporter	Oidma1_56539	56539	2.9e-44	2.9e-44	-1	2.A.1.	312	12	1.73	6	The Major Facilitator Superfamily (MFS)	>Oidma1_56539	gnl|TC-DB|P39932	2.A.1.1.38	100	PF00083; PF07690; PF07690;	2e-099; 9e-027; 1e-026;	Sugar_tr Sugar (and other) transporter; MFS_1 Major Facilitator Superfamily; MFS_1 Major Facilitator Superfamily;						sp|P39932|STL1_YEAST		1e-42
jgi|Oidma1|60639|	60564					MYC vs FLM UP		MYC Cd vs FLM Cd UP		1.72513	1	73.0878	0	41.9393	3.75293e-05	0.989913	0.987792	0.401064	0.691886	29.3129	29.0172	497	Sugar transporter ; General substrate transporter ; Sugar transporter ; Major facilitator superfamily ; Sugar transporter, conserved site ; MFS general substrate transporter	Oidma1_60564	60564	7.9e-50	7.9e-50	-1	2.A.1.	312	12	1.73	6	The Major Facilitator Superfamily (MFS)	>Oidma1_60564	gnl|TC-DB|Q12300	2.A.1.1.19	100	PF00083; PF07690;	3e-096; 1e-021;	Sugar_tr Sugar (and other) transporter; MFS_1 Major Facilitator Superfamily;						sp|P49374|HGT1_KLULA		2e-47
jgi|Oidma1|159110|	159035						MYC vs FLM DOWN		MYC Cd vs FLM Cd DOWN	1.08375	1	0.421507	1.19227e-09	0.484089	3.67784e-11	1.24466	0.793106	53.7055	58.2034	22.6372	28.1756	132	Splicing factor PWI ; Splicing factor PWI						3.A.18					The Nuclear mRNA Exporter (mRNA-E) Family		gnl|TC-DB|Q8IYB3	3.A.18.1.1					904	104	246	2e-25	51.9	sp|Q9USH5|YJQ5_SCHPO	265	8e-28
jgi|Oidma1|159291|	159216						MYC vs FLM DOWN			0.81065	0.284991	0.458076	1.19556e-08	0.660361	1.04903e-07	1.16863	0.719001	87.8037	71.1781	40.2207	47.0032	557	Amino acid permease-associated region ; Amino acid/polyamine transporter I ; Amino acid permease, fungi ; Amino acid permease, conserved site	Oidma1_159216	159216	2.9e-149	2.9e-149	-1	2.A.3.	77	12.13	0.83	6	The Amino Acid-Polyamine-Organocation (APC) Family	>Oidma1_159216	gnl|TC-DB|P19145	2.A.3.10.2	100	PF00324;	7e-179;	AA_permease Amino acid permease;						sp|P19145|GAP1_YEAST		1e-147
jgi|Oidma1|159519|	159444						MYC vs FLM DOWN			0.820291	0.759591	0.482832	0.000675482	0.74819	0.00609023	1.27111	0.785878	32.5807	26.7257	15.731	19.9959	997	Sodium/calcium exchanger membrane region ; Beta tubulin, autoregulation binding site	Oidma1_159444	159444	8.6e-33	8.6e-33	-1	2.A.19.	18	11.11	1.1	5	The Ca2+:Cation Antiporter (CaCA) Family	>Oidma1_159444	gnl|TC-DB|NP_079235	2.A.19.4.4	100	PF01699; PF01699; PF01699;	4e-063; 9e-029; 2e-032;	Na_Ca_ex Sodium/calcium exchanger protein; Na_Ca_ex Sodium/calcium exchanger protein; Na_Ca_ex Sodium/calcium exchanger protein;						sp|P87122|YDL6_SCHPO		4e-43
jgi|Oidma1|159828|	159753			MYC Cd vs MYC UP				MYC Cd vs FLM Cd UP		1.20088	1	2.52701	0.361064	7.07622	8.41895e-05	3.36274	0.0113888	1.33435	1.60239	3.37191	11.3389	520	Major facilitator superfamily MFS-1 ; Major facilitator superfamily ; MFS general substrate transporter	Oidma1_159753	159753	2.3e-55	2.3e-55	-1	2.A.1.	312	12	1.73	6	The Major Facilitator Superfamily (MFS)	>Oidma1_159753	gnl|TC-DB|Q07824	2.A.1.2.16	100	PF07690; PF00083;	7e-058; 5e-010;	MFS_1 Major Facilitator Superfamily; Sugar_tr Sugar (and other) transporter;						sp|Q9USN4|YJA1_SCHPO		1e-66
jgi|Oidma1|159891|	159816								MYC Cd vs FLM Cd DOWN	0.853295	1	0.0272059	0.203642	0.029025	0.00116942	0.91035	0.887604	798.407	681.277	21.7214	19.7741	504	Major facilitator superfamily MFS-1 ; Nitrate transporter ; Major facilitator superfamily ; MFS general substrate transporter	Oidma1_159816	159816	4.9e-156	4.9e-156	-1	2.A.1.	312	12	1.73	6	The Major Facilitator Superfamily (MFS)	>Oidma1_159816	gnl|TC-DB|P22152	2.A.1.8.5	100	PF07690;	2e-026;	MFS_1 Major Facilitator Superfamily;						sp|P22152|CRNA_EMENI		2e-154
jgi|Oidma1|160089|	160014								MYC Cd vs FLM Cd DOWN	1.49258	0.0664546	0.634893	2.18963e-08	0.435908	1.2121e-17	1.02478	0.927918	53.8976	80.4466	34.2192	35.0673	250	GrpE nucleotide exchange factor ; GrpE nucleotide exchange factor ; GrpE nucleotide exchange factor ; GrpE nucleotide exchange factor, head						3.A.8					The Mitochondrial Protein Translocase (MPT) Family		gnl|TC-DB|P38523	3.A.8.1.1					228	203	445	4e-55	51.2	sp|Q9P5U4|GRPE_NEUCR	657	1e-85
jgi|Oidma1|161241|	161166						MYC vs FLM DOWN			0.834289	0.717106	0.419029	3.39083e-05	0.650773	0.00174905	1.29569	0.758219	59.488	49.6302	24.9272	32.298	155	Ubiquitin-conjugating enzyme, E2 ; Ubiquitin-conjugating enzyme, E2 ; Ubiquitin-conjugating enzyme, E2 ; Ubiquitin-conjugating enzyme, E2 ; Ubiquitin-conjugating enzyme/RWD-like						3.A.20					The Peroxisomal Protein Importer (PPI) Family		gnl|TC-DB|P62837	3.A.20.1.1					147	150	307	1e-36	42.0	sp|Q9C9Y7|UBC12_ARATH	331	5e-39
jgi|Oidma1|161258|	161183						MYC vs FLM DOWN		MYC Cd vs FLM Cd DOWN	0.826144	0.475199	0.219273	4.48623e-10	0.182662	3.78873e-53	0.688206	0.0205069	286.455	236.653	62.8118	43.2274	409		Oidma1_161183	161183	7.9e-37	7.9e-37	-1	2.A.39.	12	12.17	0.37	3	The Nucleobase:Cation Symporter-1 (NCS1) Family	>Oidma1_161183	gnl|TC-DB|ACA81792	2.A.39.2.4	80									sp|P40039|FCY21_YEAST		2e-32
jgi|Oidma1|161738|	161663						MYC vs FLM DOWN		MYC Cd vs FLM Cd DOWN	0.874641	0.93848	0.432939	0.000210462	0.423343	1.64512e-05	0.855255	0.770352	68.1945	59.6457	29.524	25.2506	1027	Cyclic nucleotide-binding ; Sulphate transporter ; Sulphate transporter/antisigma-factor antagonist STAS ; Cyclic nucleotide-binding ; Cyclic nucleotide-binding ; Sulphate transporter/antisigma-factor antagonist STAS ; Cyclic nucleotide-binding ; Sulphate transporter/antisigma-factor antagonist STAS	Oidma1_161663	161663	9.1e-195	9.1e-195	-1	2.A.53.	25	11.4	1.55	1	The Sulfate Permease (SulP) Family	>Oidma1_161663	gnl|TC-DB|Q09764	2.A.53.7.1	40	PF00916; PF00916; PF00916; PF01740;	9e-033; 2e-006; 4e-027; 4e-011;	Sulfate_transp Sulfate transporter family; Sulfate_transp Sulfate transporter family; Sulfate_transp Sulfate transporter family; STAS STAS domain;						sp|Q09764|YA7B_SCHPO		5e-193
jgi|Oidma1|162610|	162535								MYC Cd vs FLM Cd DOWN	1.09569	1	0.527658	3.68703e-10	0.441977	3.68328e-11	0.917773	0.886719	48.9881	53.6758	25.849	23.7235	284	Cystinosin/ERS1p repeat ; Mannose-P-dolichol utilization defect 1 protein ; Cystinosin/ERS1p repeat	Oidma1_162535	162535	2.4e-23	2.4e-23	-1	2.A.43.	3	6.67	0.47	6	The Lysosomal Cystine Transporter (LCT) Family	>Oidma1_162535	gnl|TC-DB|Q60441	2.A.43.3.1	20	PF04193; PF04193;	7e-018; 3e-017;	PQ-loop PQ loop repeat; PQ-loop PQ loop repeat;						sp|Q9VMW8|MPU1_DROME		4e-27
jgi|Oidma1|163250|	163175						MYC vs FLM DOWN			0.861233	0.643072	0.470828	3.16995e-07	0.606482	2.67508e-05	1.10937	0.902298	40.0398	34.4836	18.8519	20.9136	629	Aldehyde dehydrogenase, conserved site ; WD40 repeat						1.I.1					The Eukaryotic Nuclear Pore Complex (E-NPC) Family		gnl|TC-DB|G0S2X1	1.I.1.1.2					751	615	957	5e-120	39.8	No hits found	-	-
jgi|Oidma1|163455|	163380	FLM Cd vs FLM UP								2.04689	3.18792e-07	1.10492	0.115506	0.52663	1.44618e-16	0.975598	0.993864	49.1854	100.677	54.3459	53.0198	523	Amino acid permease-associated region ; Amino acid/polyamine transporter I ; Amino acid permease subfamily ; Amino acid permease, conserved site	Oidma1_163380	163380	9e-177	9e-177	-1	2.A.3.	77	12.13	0.83	6	The Amino Acid-Polyamine-Organocation (APC) Family	>Oidma1_163380	gnl|TC-DB|Q9Y860	2.A.3.4.2	100									sp|P19807|HNM1_YEAST		4e-61
jgi|Oidma1|163483|	163408						MYC vs FLM DOWN			0.815109	0.559255	0.458295	8.33433e-06	0.586779	0.00130837	1.04363	0.996964	41.07	33.4765	18.8222	19.6433	532	Amino acid permease-associated region ; Amino acid/polyamine transporter I	Oidma1_163408	163408	3.3e-49	3.3e-49	-1	2.A.3.	77	12.13	0.83	6	The Amino Acid-Polyamine-Organocation (APC) Family	>Oidma1_163408	gnl|TC-DB|P19807	2.A.3.4.1	100	PF00324;	3e-008;	AA_permease Amino acid permease;						sp|P19807|HNM1_YEAST		2e-47
jgi|Oidma1|163504|	163429								MYC Cd vs FLM Cd DOWN	1.31797	0.464985	0.531036	5.88744e-12	0.355348	5.66552e-26	0.881933	0.862452	72.1441	95.0837	38.3111	33.7878	163	Mitochondrial import inner membrane translocase, subunit Tim17/22	Oidma1_163429	163429	2.9e-63	2.9e-63	-1	3.A.8.	24	1.29	1.24	4	The Mitochondrial Protein Translocase (MPT) Family	>Oidma1_163429	gnl|TC-DB|P39515	3.A.8.1.1	40	PF02466;	3e-054;	Tim17 Tim17/Tim22/Tim23 family;						sp|P59670|TIM17_NEUCR		6e-70
jgi|Oidma1|163685|	163610						MYC vs FLM DOWN			0.889322	0.749698	0.456155	2.87314e-07	0.608325	2.21274e-06	1.18599	0.780285	50.9213	45.2855	23.228	27.5483	569	Major facilitator superfamily MFS-1 ; MFS general substrate transporter						2.A.1					The Major Facilitator Superfamily (MFS)		gnl|TC-DB|e9cyw5	2.A.1.75.2					591	553	1246	3e-166	47.7	sp|Q9P3K8|MCH1_NEUCR	1455	0.0
jgi|Oidma1|163914|	163839						MYC vs FLM DOWN		MYC Cd vs FLM Cd DOWN	0.845201	0.151901	0.340996	5.24565e-25	0.490675	2.56259e-16	1.2162	0.452219	302.644	255.795	103.201	125.513	1460	ABC transporter-like ; ABC transporter-like ; ABC-2 type transporter ; CDR ABC transporter ; AAA+ ATPase, core ; ABC transporter-like ; ABC transporter-like ; ABC transporter, transmembrane region, type 1	Oidma1_163839	163839	0	0	-1	3.A.1.	876	4.31	3.92	0	The ATP-binding Cassette (ABC) Superfamily	>Oidma1_163839	gnl|TC-DB|P41820	3.A.1.205.11	100	PF01061; PF01061; PF01061; PF00005; PF00005; PF00005;	4e-126; 1e-069; 1e-057; 5e-050; 1e-030; 2e-020;	ABC2_membrane ABC-2 type transporter; ABC2_membrane ABC-2 type transporter; ABC2_membrane ABC-2 type transporter; ABC_tran ABC transporter; ABC_tran ABC transporter; ABC_tran ABC transporter;						sp|O74676|CDR4_CANAL		0
jgi|Oidma1|164020|	163945						MYC vs FLM DOWN			0.750027	0.531882	0.473554	0.00133243	0.680468	7.73505e-05	1.07774	0.943225	59.03	44.2741	27.9539	30.1271	588	Calcium-binding EF-hand ; Mitochondrial carrier protein ; Calcium-binding EF-hand ; Mitochondrial substrate carrier ; Calcium-binding EF-hand ; Calcium-binding EF-hand ; Mitochondrial substrate carrier ; Calcium-binding EF-hand ; Mitochondrial substrate carrier	Oidma1_163945	163945	3.9e-43	3.9e-43	-1	2.A.29.	72	4.42	1.35	0	The Mitochondrial Carrier (MC) Family	>Oidma1_163945	gnl|TC-DB|P48233	2.A.29.23.2	100	PF00153; PF00153; PF00153;	5e-066; 1e-024; 6e-011;	Mito_carr Mitochondrial carrier protein; Mito_carr Mitochondrial carrier protein; Mito_carr Mitochondrial carrier protein;						sp|P48233|CMC1_YEAST		2e-41
jgi|Oidma1|120081|	120006					MYC vs FLM UP				1.39838	1	18.3531	0.00330718	2.81615	0.600201	0.214572	0.114854	0.231561	0.32381	4.24985	0.911898	530	Sugar transporter ; General substrate transporter ; Sugar transporter ; Major facilitator superfamily ; Sugar transporter, conserved site ; MFS general substrate transporter	Oidma1_120006	120006	1.4e-92	1.4e-92	-1	2.A.1.	312	12	1.73	6	The Major Facilitator Superfamily (MFS)	>Oidma1_120006	gnl|TC-DB|P49374	2.A.1.1.39	100	PF00083; PF07690;	1e-093; 2e-016;	Sugar_tr Sugar (and other) transporter; MFS_1 Major Facilitator Superfamily;						sp|P49374|HGT1_KLULA		7e-91
jgi|Oidma1|164498|	164423						MYC vs FLM DOWN		MYC Cd vs FLM Cd DOWN	0.75375	0.813835	0.393769	0.00843012	0.484208	8.9592e-07	0.926866	0.891987	441.738	332.96	173.943	161.222	992	ATPase, P-type, K/Mg/Cd/Cu/Zn/Na/Ca/Na/H-transporter ; H+ transporting ATPase, proton pump ; E1-E2 ATPase-associated region ; ATPase, P-type cation-transporter, N-terminal ; Haloacid dehalogenase-like hydrolase ; ATPase, P-type, K/Mg/Cd/Cu/Zn/Na/Ca/Na/H-transporter ; Plasma-membrane proton-efflux P-type ATPase ; ATPase, P-type, K/Mg/Cd/Cu/Zn/Na/Ca/Na/H-transporter	Oidma1_164423	164423	5e-190	5e-190	-1	3.A.3.	111	8.67	2.57	1	The P-type ATPase (P-ATPase) Superfamily	>Oidma1_164423	gnl|TC-DB|P07038	3.A.3.3.1	100	PF00122; PF00702; PF00690;	4e-067; 3e-022; 1e-021;	E1-E2_ATPase E1-E2 ATPase; Hydrolase haloacid dehalogenase-like hydrolase; Cation_ATPase_N Cation transporter/ATPase;						sp|Q07421|PMA1_AJECA		5e-190
jgi|Oidma1|164663|	164588								MYC Cd vs FLM Cd DOWN	1.34614	0.211243	0.677935	6.48267e-11	0.386897	2.2845e-31	0.768242	0.198319	90.3766	121.66	61.2695	47.0698	233	Rieske iron-sulphur protein, C-terminal ; Rieske [2Fe-2S] region ; Ubiquinol cytochrome reductase transmembrane region ; Ubiquinol-cytochrome c reductase, iron-sulphur subunit ; Rieske iron-sulphur protein, C-terminal ; Rieske iron-sulphur protein, C-terminal ; Rieske [2Fe-2S] region ; Ubiquinol cytochrome reductase transmembrane region	Oidma1_164588	164588	7.2e-73	7.2e-73	-1	3.D.3.	14	3.57	3.11	2	The Proton-translocating Quinol:Cytochrome c Reductase (QCR) Superfamily	>Oidma1_164588	gnl|TC-DB|P08067	3.D.3.3.1	80	PF00355; PF02921;	5e-024; 3e-015;	Rieske Rieske [2Fe-2S] domain; UCR_TM Ubiquinol cytochrome reductase transmembrane region;						sp|P07056|UCRI_NEUCR		4e-91
jgi|Oidma1|165177|	165102						MYC vs FLM DOWN		MYC Cd vs FLM Cd DOWN	0.877618	1	0.495311	0.00940992	0.413129	0.00143847	0.732004	0.0473054	145.027	127.278	71.8333	52.5823	1068	ABC transporter-like ; ABC transporter-like ; HEAT ; AAA+ ATPase, core ; HEAT ; ABC transporter-like ; ABC transporter-like ; Armadillo-type fold	Oidma1_165102	165102	4.1e-20	4.1e-20	-1	3.A.1.	876	4.31	3.92	1	The ATP-binding Cassette (ABC) Superfamily	>Oidma1_165102	gnl|TC-DB|O54396	3.A.1.121.2	100	PF00005; PF00005;	1e-092; 2e-034;	ABC_tran ABC transporter; ABC_tran ABC transporter;						sp|O93796|EF3_CANGA		0
jgi|Oidma1|165385|	165310						MYC vs FLM DOWN		MYC Cd vs FLM Cd DOWN	0.618512	0.023161	0.218432	6.87169e-18	0.205628	8.99743e-07	0.582257	0.0659526	7481.84	4627.61	1634.27	951.565	531	General substrate transporter ; Sugar transporter ; Major facilitator superfamily ; Sugar transporter, conserved site ; MFS general substrate transporter	Oidma1_165310	165310	9.1e-68	9.1e-68	-1	2.A.1.	312	12	1.73	6	The Major Facilitator Superfamily (MFS)	>Oidma1_165310	gnl|TC-DB|P07921	2.A.1.1.9	100	PF00083; PF07690;	1e-075; 5e-034;	Sugar_tr Sugar (and other) transporter; MFS_1 Major Facilitator Superfamily;						sp|P07921|LACP_KLULA		4e-66
jgi|Oidma1|132910|	132835					MYC vs FLM UP				1.89132	1	8.00328	0.00576263	1.78095	0.710366	0.420871	0.349399	0.665165	1.25804	5.3235	2.24051	545	Sugar transporter ; General substrate transporter ; Sugar transporter ; Major facilitator superfamily ; Sugar transporter, conserved site ; MFS general substrate transporter	Oidma1_132835	132835	1.9e-137	1.9e-137	-1	2.A.1.	312	12	1.73	6	The Major Facilitator Superfamily (MFS)	>Oidma1_132835	gnl|TC-DB|Q8NJ22	2.A.1.1.33	100	PF00083; PF07690;	4e-084; 2e-030;	Sugar_tr Sugar (and other) transporter; MFS_1 Major Facilitator Superfamily;						sp|Q8VZR6|INT1_ARATH		9e-57
jgi|Oidma1|23874|	23799					MYC vs FLM UP				4.06941	0.688643	10.6935	0.00365505	1.06385	0.866938	0.404846	0.362446	0.469453	1.9104	5.0201	2.03237	556	Sugar transporter ; General substrate transporter ; Sugar transporter ; Major facilitator superfamily ; Sugar transporter, conserved site ; Sugar transporter, conserved site ; MFS general substrate transporter	Oidma1_23799	23799	1.5e-57	1.5e-57	-1	2.A.1.	312	12	1.73	5	The Major Facilitator Superfamily (MFS)	>Oidma1_23799	gnl|TC-DB|P30605	2.A.1.1.8	100	PF00083; PF00083; PF00083; PF07690;	2e-090; 3e-006; 5e-085; 3e-021;	Sugar_tr Sugar (and other) transporter; Sugar_tr Sugar (and other) transporter; Sugar_tr Sugar (and other) transporter; MFS_1 Major Facilitator Superfamily;						sp|P30606|ITR2_YEAST		2e-68
jgi|Oidma1|166409|	166334								MYC Cd vs FLM Cd DOWN	1.09294	1	0.684117	1.27246e-07	0.492837	2.86806e-13	0.787355	0.265319	62.0034	67.7662	42.4176	33.3977	416	UAA transporter ; UDP-galactose transporter	Oidma1_166334	166334	1.1e-52	1.1e-52	-1	2.A.7.	74	8.31	2.38	6	The Drug/Metabolite Transporter (DMT) Superfamily	>Oidma1_166334	gnl|TC-DB|Q00974	2.A.7.10.1	60	PF08449;	5e-111;	UAA UAA transporter family;						sp|Q00974|YEA4_KLULA		5e-51
jgi|Oidma1|166432|	166357								MYC Cd vs FLM Cd DOWN	1.31175	0.689687	0.548944	2.42536e-08	0.407756	2.19705e-13	0.974368	0.997789	42.0431	55.1501	23.0793	22.4877	164	Protein of unknown function Cys-rich ; Protein of unknown function Cys-rich						1.A.87					The Mechanosensitive Calcium Channel (MCA) Family		gnl|TC-DB|F6V5N5	1.A.87.3.3					110	93	129	2e-10	32.3	No hits found	-	-
jgi|Oidma1|166616|	166541						MYC vs FLM DOWN		MYC Cd vs FLM Cd DOWN	0.711488	0.504968	0.213338	2.31825e-06	0.260896	5.91258e-06	0.870092	0.866212	70.7629	50.3469	15.0964	13.1353	525	Amino acid permease-associated region ; Amino acid/polyamine transporter I	Oidma1_166541	166541	4.9e-58	4.9e-58	-1	2.A.3.	77	12.13	0.83	7	The Amino Acid-Polyamine-Organocation (APC) Family	>Oidma1_166541	gnl|TC-DB|Q9Y860	2.A.3.4.2	100	PF00324;	4e-013;	AA_permease Amino acid permease;						sp|P19807|HNM1_YEAST		7e-51
jgi|Oidma1|167133|	167058							MYC Cd vs FLM Cd UP		0.500547	0.726689	1.97171	0.46289	4.00785	0.0188415	1.01745	0.978285	3.31097	1.65729	6.52827	6.64218	510	Major facilitator superfamily MFS-1 ; MFS general substrate transporter	Oidma1_167058	167058	2.9e-63	2.9e-63	-1	2.A.1.	312	12	1.73	6	The Major Facilitator Superfamily (MFS)	>Oidma1_167058	gnl|TC-DB|P15365	2.A.1.14.4	100	PF07690;	1e-036;	MFS_1 Major Facilitator Superfamily;						sp|P15365|DAL5_YEAST		1e-61
jgi|Oidma1|27267|	27192					MYC vs FLM UP		MYC Cd vs FLM Cd UP		0.77869	1	3.07659	0.00274191	3.27121	8.0106e-11	0.82795	0.168053	25.6236	19.9529	78.8334	65.2701	545	Sugar transporter ; General substrate transporter ; Sugar transporter ; Major facilitator superfamily ; Sugar transporter, conserved site ; Sugar transporter, conserved site ; MFS general substrate transporter	Oidma1_27192	27192	1.1e-190	1.1e-190	-1	2.A.1.	312	12	1.73	6	The Major Facilitator Superfamily (MFS)	>Oidma1_27192	gnl|TC-DB|P11636	2.A.1.1.7	100	PF00083; PF07690; PF07690;	8e-164; 9e-016; 1e-015;	Sugar_tr Sugar (and other) transporter; MFS_1 Major Facilitator Superfamily; MFS_1 Major Facilitator Superfamily;						sp|P15325|QUTD_EMENI		1e-215
jgi|Oidma1|167978|	167903						MYC vs FLM DOWN			0.904402	0.101881	0.437883	1.9649e-38	0.576288	1.45173e-20	1.19026	0.523485	153.733	139.037	67.3173	80.1252	440	AAA ATPase, core ; AAA+ ATPase, core ; 26S proteasome subunit P45 ; AAA ATPase, conserved site						3.A.16					The Endoplasmic Reticular Retrotranslocon (ER-RT) Family		gnl|TC-DB|P25694	3.A.16.1.2					835	230	541	2e-61	45.7	sp|P33299|PRS7_YEAST	1854	0.0
jgi|Oidma1|168009|	167934						MYC vs FLM DOWN			1.09704	1	0.428625	4.50286e-07	0.505863	1.02591e-06	1.29473	0.644894	31.9491	35.0495	13.6942	17.7302	521	Major facilitator superfamily MFS-1 ; Major facilitator superfamily ; MFS general substrate transporter	Oidma1_167934	167934	4.2e-94	4.2e-94	-1	2.A.1.	312	12	1.73	4	The Major Facilitator Superfamily (MFS)	>Oidma1_167934	gnl|TC-DB|P15365	2.A.1.14.4	100	PF07690;	2e-036;	MFS_1 Major Facilitator Superfamily;						sp|P15365|DAL5_YEAST		2e-92
jgi|Oidma1|168316|	168241						MYC vs FLM DOWN			0.839104	0.0797622	0.428451	4.93154e-22	0.650225	4.97569e-09	1.27344	0.617389	89.1733	74.8256	38.2064	48.6535	432	Src homology-3 ; Src homology-3 ; Src homology-3 ; Peroxin 13, N-terminal ; Src homology-3 ; Src homology-3 ; Src homology-3						3.A.20					The Peroxisomal Protein Importer (PPI) Family		gnl|TC-DB|P80667	3.A.20.1.5					386	250	545	1e-65	46.0	sp|P80667|PEX13_YEAST	545	3e-64
jgi|Oidma1|168461|	168386						MYC vs FLM DOWN			0.745482	0.314006	0.323181	2.2151e-07	0.524192	2.30734e-09	1.20915	0.646068	72.9086	54.3521	23.5627	28.4909	543	Cation efflux protein ; Cation efflux protein ; ATPase, F1/V1/A1 complex, alpha/beta subunit, nucleotide-binding ; Corticotropin-releasing factor, CRF	Oidma1_168386	168386	7.2e-36	7.2e-36	-1	2.A.4.	21	6.86	3.38	4	The Cation Diffusion Facilitator (CDF) Family	>Oidma1_168386	gnl|TC-DB|P20107	2.A.4.2.2	100	PF01545; PF01545; PF01545;	2e-069; 2e-034; 5e-033;	Cation_efflux Cation efflux family; Cation_efflux Cation efflux family; Cation_efflux Cation efflux family;						sp|O13918|ZHF1_SCHPO		4e-34
jgi|Oidma1|168765|	168690						MYC vs FLM DOWN			0.699574	0.0329246	0.263236	4.67038e-13	0.502143	6.75031e-28	1.33449	0.103192	214.596	150.126	56.4894	75.3847	800	Sodium/calcium exchanger membrane region	Oidma1_168690	168690	1.3e-39	1.3e-39	-1	2.A.19.	18	11.11	1.1	4	The Ca2+:Cation Antiporter (CaCA) Family	>Oidma1_168690	gnl|TC-DB|Q99385	2.A.19.2.2	100	PF01699; PF01699; PF01699;	1e-051; 3e-017; 8e-033;	Na_Ca_ex Sodium/calcium exchanger protein; Na_Ca_ex Sodium/calcium exchanger protein; Na_Ca_ex Sodium/calcium exchanger protein;						sp|Q99385|VCX1_YEAST		6e-38
jgi|Oidma1|168872|	168797						MYC vs FLM DOWN			0.896772	0.00454581	0.43697	1.01085e-08	0.584352	2.34707e-25	1.19924	0.938635	694.631	622.926	303.533	364.008	148	Ubiquitin-conjugating enzyme, E2 ; Ubiquitin-conjugating enzyme, E2 ; Ubiquitin-conjugating enzyme, E2 ; Ubiquitin-conjugating enzyme, E2 ; Ubiquitin-conjugating enzyme, E2 ; Ubiquitin-conjugating enzyme/RWD-like						3.A.20					The Peroxisomal Protein Importer (PPI) Family		gnl|TC-DB|P62837	3.A.20.1.1					147	147	689	6e-95	84.4	sp|Q9UVR2|UBC1_MAGO7	764	5e-105
jgi|Oidma1|168960|	168885							MYC Cd vs FLM Cd UP		0.709455	0.717762	1.30881	0.893593	2.91073	0.00115765	1.5778	0.35535	9.19127	6.52079	12.0296	18.9802	495	Major facilitator superfamily MFS-1 ; MFS general substrate transporter	Oidma1_168885	168885	9e-62	9e-62	-1	2.A.1.	312	12	1.73	5	The Major Facilitator Superfamily (MFS)	>Oidma1_168885	gnl|TC-DB|P15365	2.A.1.14.4	60	PF07690;	3e-031;	MFS_1 Major Facilitator Superfamily;						sp|P15365|DAL5_YEAST		4e-60
jgi|Oidma1|52732|	52657					MYC vs FLM UP				2.13591	0.894914	7.0128	0.00066049	2.78991	0.053627	0.849732	0.906369	1.34132	2.86494	9.40641	7.99293	497	Sugar transporter ; General substrate transporter ; Sugar transporter ; Major facilitator superfamily ; Sugar transporter, conserved site ; Sugar transporter, conserved site ; MFS general substrate transporter	Oidma1_52657	52657	3e-49	3e-49	-1	2.A.1.	312	12	1.73	6	The Major Facilitator Superfamily (MFS)	>Oidma1_52657	gnl|TC-DB|P39932	2.A.1.1.38	100	PF00083; PF07690;	4e-110; 4e-024;	Sugar_tr Sugar (and other) transporter; MFS_1 Major Facilitator Superfamily;						sp|P39932|STL1_YEAST		1e-47
jgi|Oidma1|102879|	102804					MYC vs FLM UP		MYC Cd vs FLM Cd UP		1.5351	0.951911	4.26037	0.033466	5.07459	3.618e-12	1.82849	0.239657	5.53436	8.49581	23.5784	43.1128	580	Sugar transporter ; General substrate transporter ; Sugar transporter ; Major facilitator superfamily ; Sugar transporter, conserved site ; Sugar transporter, conserved site ; MFS general substrate transporter	Oidma1_102804	102804	4.9e-62	4.9e-62	-1	2.A.1.	312	12	1.73	6	The Major Facilitator Superfamily (MFS)	>Oidma1_102804	gnl|TC-DB|Q64L87	2.A.1.1.40	100	PF00083; PF00083; PF00083; PF07690;	1e-122; 6e-054; 8e-067; 2e-024;	Sugar_tr Sugar (and other) transporter; Sugar_tr Sugar (and other) transporter; Sugar_tr Sugar (and other) transporter; MFS_1 Major Facilitator Superfamily;						sp|Q8GXR2|PLT6_ARATH		4e-42
jgi|Oidma1|103507|	103432					MYC vs FLM UP				1.22498	1	3.50595	0.0348316	1.81014	0.275331	0.632461	0.637425	327.629	401.338	1148.65	726.477	582	Sugar transporter ; General substrate transporter ; Sugar transporter ; Major facilitator superfamily ; Sugar transporter, conserved site ; Sugar transporter, conserved site ; MFS general substrate transporter	Oidma1_103432	103432	2.1e-113	2.1e-113	-1	2.A.1.	312	12	1.73	6	The Major Facilitator Superfamily (MFS)	>Oidma1_103432	gnl|TC-DB|Q64L87	2.A.1.1.40	100	PF00083; PF00083; PF00083; PF07690; PF07690; PF07690;	6e-132; 1e-064; 3e-065; 7e-022; 1e-011; 2e-011;	Sugar_tr Sugar (and other) transporter; Sugar_tr Sugar (and other) transporter; Sugar_tr Sugar (and other) transporter; MFS_1 Major Facilitator Superfamily; MFS_1 Major Facilitator Superfamily; MFS_1 Major Facilitator Superfamily;						sp|Q9ZNS0|PLT3_ARATH		2e-49
jgi|Oidma1|170127|	170052								MYC Cd vs FLM Cd DOWN	1.28211	1	0.786106	0.000313178	0.423362	0.000976463	0.690488	0.0188871	82.3906	105.634	64.7678	44.7214	321	Mitochondrial carrier protein ; Mitochondrial substrate carrier ; Mitochondrial substrate carrier ; Mitochondrial substrate carrier	Oidma1_170052	170052	8.9e-86	8.9e-86	-1	2.A.29.	72	4.42	1.35	3	The Mitochondrial Carrier (MC) Family	>Oidma1_170052	gnl|TC-DB|NP_012611	2.A.29.4.3	100	PF00153; PF00153; PF00153; PF00153;	2e-059; 7e-023; 8e-026; 5e-012;	Mito_carr Mitochondrial carrier protein; Mito_carr Mitochondrial carrier protein; Mito_carr Mitochondrial carrier protein; Mito_carr Mitochondrial carrier protein;						sp|P23641|MPCP_YEAST		4e-84
jgi|Oidma1|106493|	106418			MYC Cd vs MYC UP		MYC vs FLM UP		MYC Cd vs FLM Cd UP		2.9248	0.180987	38.7814	0	27.3027	0	2.05911	0	3.91189	11.4415	151.709	312.385	531	Sugar transporter ; General substrate transporter ; Sugar transporter ; Major facilitator superfamily ; Sugar transporter, conserved site ; Sugar transporter, conserved site ; MFS general substrate transporter	Oidma1_106418	106418	1.9e-121	1.9e-121	-1	2.A.1.	312	12	1.73	6	The Major Facilitator Superfamily (MFS)	>Oidma1_106418	gnl|TC-DB|Q2MEV7	2.A.1.1.51	100	PF00083; PF07690;	2e-137; 5e-024;	Sugar_tr Sugar (and other) transporter; MFS_1 Major Facilitator Superfamily;						sp|Q92253|RCO3_NEUCR		2e-134
jgi|Oidma1|106931|	106856					MYC vs FLM UP		MYC Cd vs FLM Cd UP		1.06494	1	6.98034	0	11.6802	0	1.78196	0	15.9334	16.9681	111.221	198.191	573	Sugar transporter ; General substrate transporter ; Sugar transporter ; Major facilitator superfamily ; Sugar transporter, conserved site ; Sugar transporter, conserved site ; MFS general substrate transporter	Oidma1_106856	106856	9.1e-154	9.1e-154	-1	2.A.1.	312	12	1.73	5	The Major Facilitator Superfamily (MFS)	>Oidma1_106856	gnl|TC-DB|Q8NJ22	2.A.1.1.33	100	PF00083; PF07690;	4e-093; 1e-027;	Sugar_tr Sugar (and other) transporter; MFS_1 Major Facilitator Superfamily;						sp|Q8VZR6|INT1_ARATH		1e-58
jgi|Oidma1|107181|	107106					MYC vs FLM UP		MYC Cd vs FLM Cd UP		0.890288	1	9.68742	0	5.74119	3.42383e-10	0.527624	1.47916e-05	6.15759	5.48203	59.6511	31.4733	526	Sugar transporter ; General substrate transporter ; Sugar transporter ; Major facilitator superfamily ; Sugar transporter, conserved site ; Sugar transporter, conserved site ; MFS general substrate transporter	Oidma1_107106	107106	8.4e-58	8.4e-58	-1	2.A.1.	312	12	1.73	6	The Major Facilitator Superfamily (MFS)	>Oidma1_107106	gnl|TC-DB|P07921	2.A.1.1.9	100	PF00083; PF07690;	2e-086; 1e-026;	Sugar_tr Sugar (and other) transporter; MFS_1 Major Facilitator Superfamily;						sp|P07921|LACP_KLULA		4e-56
jgi|Oidma1|171144|	171069								MYC Cd vs FLM Cd DOWN	1.12942	1	0.522778	0.0357026	0.429728	5.70522e-07	0.928391	0.896252	323.086	364.899	168.902	156.807	670	Sugar transporter ; General substrate transporter ; Sugar transporter ; Major facilitator superfamily ; Sugar transporter, conserved site ; MFS general substrate transporter	Oidma1_171069	171069	9.2e-44	9.2e-44	-1	2.A.1.	312	12	1.73	4	The Major Facilitator Superfamily (MFS)	>Oidma1_171069	gnl|TC-DB|Q8NJ22	2.A.1.1.33	100	PF00083; PF07690;	3e-085; 1e-010;	Sugar_tr Sugar (and other) transporter; MFS_1 Major Facilitator Superfamily;						sp|Q9ZNS0|PLT3_ARATH		1e-44
jgi|Oidma1|171834|	171759						MYC vs FLM DOWN			0.696655	0.81937	0.435204	0.0326168	0.608069	4.97569e-09	0.97337	0.926207	199.388	138.904	86.7743	84.4635	565	DNA/RNA helicase, DEAD/DEAH box type, N-terminal ; DNA/RNA helicase, C-terminal ; DEAD-like helicase, N-terminal ; DNA/RNA helicase, C-terminal ; Helicase, superfamily 1 and 2, ATP-binding ; DNA/RNA helicase, C-terminal ; RNA helicase, DEAD-box type, Q motif ; RNA helicase, ATP-dependent, DEAD-box, conserved site						1.I.1					The Eukaryotic Nuclear Pore Complex (E-NPC) Family		gnl|TC-DB|O00571	1.I.1.1.3					662	416	857	4e-107	43.3	sp|A7E449|DBP2_SCLS1	2304	0.0
jgi|Oidma1|172713|	172638						MYC vs FLM DOWN		MYC Cd vs FLM Cd DOWN	0.579433	0.0449043	0.246315	1.17454e-08	0.301981	2.76424e-06	0.710383	0.708477	30.0174	17.3931	7.39372	5.25237	547	Sodium/hydrogen exchanger	Oidma1_172638	172638	2.2e-72	2.2e-72	-1	2.A.36.	25	12.4	1.02	6	The Monovalent Cation:Proton Antiporter-1 (CPA1) Family	>Oidma1_172638	gnl|TC-DB|Q99271	2.A.36.4.1	100	PF00999;	6e-022;	Na_H_Exchanger Sodium/hydrogen exchanger family;						sp|Q99271|NAH1_YEAST		1e-70
jgi|Oidma1|119240|	119165					MYC vs FLM UP				1.40285	1	25.061	0.0179589	7.33431	0.224418	0.410557	0.643182	0.117991	0.165524	2.95697	1.21401	508	Sugar transporter ; General substrate transporter ; Sugar transporter ; Major facilitator superfamily ; Sugar transporter, conserved site ; Sugar transporter, conserved site ; MFS general substrate transporter	Oidma1_119165	119165	1.2e-48	1.2e-48	-1	2.A.1.	312	12	1.73	6	The Major Facilitator Superfamily (MFS)	>Oidma1_119165	gnl|TC-DB|P13181	2.A.1.1.6	100	PF00083; PF07690;	6e-101; 6e-016;	Sugar_tr Sugar (and other) transporter; MFS_1 Major Facilitator Superfamily;						sp|P23585|HXT2_YEAST		2e-47
jgi|Oidma1|121048|	120973					MYC vs FLM UP		MYC Cd vs FLM Cd UP		0.973523	1	5.36126	0	2.90935	0.0453496	0.528293	0.0452967	15.7351	15.3185	84.36	44.5668	519	Sugar transporter ; General substrate transporter ; Sugar transporter ; Major facilitator superfamily ; Sugar transporter, conserved site ; Sugar transporter, conserved site ; MFS general substrate transporter	Oidma1_120973	120973	7.1e-41	7.1e-41	-1	2.A.1.	312	12	1.73	6	The Major Facilitator Superfamily (MFS)	>Oidma1_120973	gnl|TC-DB|Q2MEV7	2.A.1.1.51	100	PF00083; PF07690;	2e-103; 2e-029;	Sugar_tr Sugar (and other) transporter; MFS_1 Major Facilitator Superfamily;						sp|Q4U3U4|QAY_NEUTR		4e-40
jgi|Oidma1|143031|	142956					MYC vs FLM UP		MYC Cd vs FLM Cd UP		0.968021	1	11.2147	1.20221e-14	7.97565	2.35116e-09	0.688437	0.192075	2.98369	2.88827	33.461	23.0358	502	Sugar transporter ; General substrate transporter ; Sugar transporter ; Major facilitator superfamily ; Sugar transporter, conserved site ; Sugar transporter, conserved site ; MFS general substrate transporter	Oidma1_142956	142956	1.1e-35	1.1e-35	-1	2.A.1.	312	12	1.73	6	The Major Facilitator Superfamily (MFS)	>Oidma1_142956	gnl|TC-DB|Q94AZ2	2.A.1.1.50	100	PF00083; PF07690; PF07690;	6e-101; 1e-023; 3e-023;	Sugar_tr Sugar (and other) transporter; MFS_1 Major Facilitator Superfamily; MFS_1 Major Facilitator Superfamily;						sp|P32466|HXT3_YEAST		3e-34
jgi|Oidma1|148552|	148477					MYC vs FLM UP		MYC Cd vs FLM Cd UP		2.41957	0.0780958	7.96552	0.00219487	4.40527	0	1.33812	0.773173	13.4942	32.65	107.488	143.832	529	Sugar transporter ; General substrate transporter ; Sugar transporter ; Major facilitator superfamily ; Sugar transporter, conserved site ; Sugar transporter, conserved site ; MFS general substrate transporter	Oidma1_148477	148477	1.3e-50	1.3e-50	-1	2.A.1.	312	12	1.73	6	The Major Facilitator Superfamily (MFS)	>Oidma1_148477	gnl|TC-DB|P49374	2.A.1.1.39	100	PF00083; PF07690; PF07690;	5e-115; 2e-016; 6e-016;	Sugar_tr Sugar (and other) transporter; MFS_1 Major Facilitator Superfamily; MFS_1 Major Facilitator Superfamily;						sp|P15325|QUTD_EMENI		2e-82
jgi|Oidma1|173090|	173015					MYC vs FLM UP		MYC Cd vs FLM Cd UP		0.65424	1	40.1178	0.0011918	57.1908	5.09329e-05	0.932667	0.973374	0.176172	0.115259	7.06762	6.59174	528	Sugar transporter ; General substrate transporter ; Sugar transporter ; Major facilitator superfamily ; Sugar transporter, conserved site ; Sugar transporter, conserved site ; MFS general substrate transporter	Oidma1_173015	173015	6.5e-42	6.5e-42	-1	2.A.1.	312	12	1.73	6	The Major Facilitator Superfamily (MFS)	>Oidma1_173015	gnl|TC-DB|P49374	2.A.1.1.39	100	PF00083; PF07690; PF07690;	5e-141; 3e-018; 4e-018;	Sugar_tr Sugar (and other) transporter; MFS_1 Major Facilitator Superfamily; MFS_1 Major Facilitator Superfamily;						sp|P15325|QUTD_EMENI		6e-60
jgi|Oidma1|175081|	175006						MYC vs FLM DOWN		MYC Cd vs FLM Cd DOWN	1.13096	1	0.471028	0.00246175	0.461871	3.3737e-06	1.10897	0.867361	68.0708	76.9852	32.0632	35.5572	547	Major facilitator superfamily MFS-1 ; Major facilitator superfamily ; MFS general substrate transporter	Oidma1_175006	175006	6.3e-88	6.3e-88	-1	2.A.1.	312	12	1.73	5	The Major Facilitator Superfamily (MFS)	>Oidma1_175006	gnl|TC-DB|P53389	2.A.1.2.33	100	PF07690;	2e-031;	MFS_1 Major Facilitator Superfamily;						sp|P53389|HOL1_YEAST		3e-86
jgi|Oidma1|175175|	175100						MYC vs FLM DOWN		MYC Cd vs FLM Cd DOWN	0.897041	1	0.354736	0.00548869	0.437142	0.00216693	1.10543	0.764679	254.62	228.405	90.323	99.8453	680	Heat shock protein 70 ; Heat shock protein Hsp70 ; Heat shock protein 70 ; Chaperone DnaK ; Heat shock protein 70 ; Heat shock protein 70 ; Heat shock protein 70						1.A.33					The Cation Channel-forming Heat Shock Protein-70 (Hsp70) Family		gnl|TC-DB|P0A6Y8	1.A.33.1.2					638	571	1892	0.0	62.5	sp|Q5B0C0|HSP7M_EMENI	2910	0.0
jgi|Oidma1|175580|	175505								MYC Cd vs FLM Cd DOWN	1.16163	1	0.742385	0.112225	0.381634	9.05092e-05	0.597153	0.000435723	84.2399	97.8557	62.5385	37.345	521	Major facilitator superfamily MFS-1 ; Major facilitator superfamily ; MFS general substrate transporter	Oidma1_175505	175505	1.7e-10	1.7e-10	-1	2.A.1.	312	12	1.73	6	The Major Facilitator Superfamily (MFS)	>Oidma1_175505	gnl|TC-DB|P32071	2.A.1.2.2	100	PF07690;	7e-024;	MFS_1 Major Facilitator Superfamily;						sp|P32071|CYHR_CANMA		8e-09
jgi|Oidma1|175581|	175506								MYC Cd vs FLM Cd DOWN	0.894473	0.939743	0.616244	0.00151214	0.398583	0.000115371	0.57854	0.427876	17.4133	15.5757	10.7308	6.20822	506	Permease for cytosine/purines, uracil, thiamine, allantoin	Oidma1_175506	175506	2.5e-59	2.5e-59	-1	2.A.39.	12	12.17	0.37	5	The Nucleobase:Cation Symporter-1 (NCS1) Family	>Oidma1_175506	gnl|TC-DB|P53099	2.A.39.2.2	100	PF02133;	2e-010;	Transp_cyt_pur Permease for cytosine/purines;						sp|P53099|TPN1_YEAST		1e-57
jgi|Oidma1|175988|	175913							MYC Cd vs FLM Cd UP		0.741061	1	1.70181	0.724843	4.75109	0.0405061	2.06888	0.581594	1.94624	1.44228	3.31212	6.8524	1122	ATPase, P-type, K/Mg/Cd/Cu/Zn/Na/Ca/Na/H-transporter ; E1-E2 ATPase-associated region ; ATPase, P-type cation-transporter, C-terminal ; ATPase, P-type cation-transporter, N-terminal ; Haloacid dehalogenase-like hydrolase ; ATPase, P-type, K/Mg/Cd/Cu/Zn/Na/Ca/Na/H-transporter ; Potassium/sodium efflux P-type ATPase, fungal-type ; ATPase, P-type, K/Mg/Cd/Cu/Zn/Na/Ca/Na/H-transporter	Oidma1_175913	175913	1.3e-226	1.3e-226	-1	3.A.3.	111	8.67	2.57	2	The P-type ATPase (P-ATPase) Superfamily	>Oidma1_175913	gnl|TC-DB|P13587	3.A.3.9.1	100	PF00122; PF00689; PF00702; PF00690;	1e-073; 2e-051; 8e-026; 3e-014;	E1-E2_ATPase E1-E2 ATPase; Cation_ATPase_C Cation transporting ATPase; Hydrolase haloacid dehalogenase-like hydrolase; Cation_ATPase_N Cation transporter/ATPase;						sp|Q01896|ATN2_YEAST		4e-185
jgi|Oidma1|176030|	175955						MYC vs FLM DOWN			0.892877	0.512788	0.48586	2.45939e-12	0.584284	1.76054e-07	1.07375	0.932148	53.8458	48.0777	26.1615	28.091	503	Sugar transporter ; General substrate transporter ; Sugar transporter ; Major facilitator superfamily ; Sugar transporter, conserved site ; MFS general substrate transporter	Oidma1_175955	175955	3.6e-58	3.6e-58	-1	2.A.1.	312	12	1.73	6	The Major Facilitator Superfamily (MFS)	>Oidma1_175955	gnl|TC-DB|A0ZXK6	2.A.1.1.43	100	PF00083; PF07690; PF07690; PF07690;	4e-088; 1e-017; 2e-010; 4e-008;	Sugar_tr Sugar (and other) transporter; MFS_1 Major Facilitator Superfamily; MFS_1 Major Facilitator Superfamily; MFS_1 Major Facilitator Superfamily;						sp|P53142|VPS73_YEAST		4e-55
jgi|Oidma1|176409|	176334						MYC vs FLM DOWN		MYC Cd vs FLM Cd DOWN	0.966849	1	0.458703	2.2151e-07	0.423353	5.0077e-07	0.892339	0.898845	28.4162	27.4742	13.0346	11.6313	534	DNA/RNA helicase, DEAD/DEAH box type, N-terminal ; DNA/RNA helicase, C-terminal ; DEAD-like helicase, N-terminal ; DNA/RNA helicase, C-terminal ; Helicase, superfamily 1 and 2, ATP-binding ; DNA/RNA helicase, C-terminal ; RNA helicase, DEAD-box type, Q motif ; RNA helicase, ATP-dependent, DEAD-box, conserved site						3.A.18					The Nuclear mRNA Exporter (mRNA-E) Family		gnl|TC-DB|P38919	3.A.18.1.1					411	385	543	5e-64	34.0	sp|A7E436|DBP8_SCLS1	2197	0.0
jgi|Oidma1|177455|	177380						MYC vs FLM DOWN		MYC Cd vs FLM Cd DOWN	1.12811	1	0.479566	0.0156881	0.419902	9.06431e-10	0.987763	0.958557	310.633	350.429	148.969	147.146	614	Tetracycline resistance protein, TetB ; Major facilitator superfamily MFS-1 ; Major facilitator superfamily ; MFS general substrate transporter	Oidma1_177380	177380	4e-46	4e-46	-1	2.A.1.	312	12	1.73	5	The Major Facilitator Superfamily (MFS)	>Oidma1_177380	gnl|TC-DB|O59726	2.A.1.48.4	100	PF07690;	4e-042;	MFS_1 Major Facilitator Superfamily;						sp|Q00357|TOXA_COCCA		3e-105
jgi|Oidma1|177693|	177618								MYC Cd vs FLM Cd DOWN	1.61056	0.448194	1.04061	0.650186	0.213443	2.20261e-10	0.330345	0.496642	15.2755	24.602	15.8959	5.25113	493	Sugar transporter ; General substrate transporter ; Sugar transporter ; Major facilitator superfamily ; Sugar transporter, conserved site ; Sugar transporter, conserved site ; MFS general substrate transporter	Oidma1_177618	177618	1.1e-46	1.1e-46	-1	2.A.1.	312	12	1.73	6	The Major Facilitator Superfamily (MFS)	>Oidma1_177618	gnl|TC-DB|Q400D8	2.A.1.1.36	100	PF00083; PF07690; PF07690;	1e-075; 6e-019; 2e-018;	Sugar_tr Sugar (and other) transporter; MFS_1 Major Facilitator Superfamily; MFS_1 Major Facilitator Superfamily;						sp|Q92253|RCO3_NEUCR		4e-42
jgi|Oidma1|178631|	178556								MYC Cd vs FLM Cd DOWN	0.533612	0.77387	0.227278	0.0512731	0.485132	0.000513982	1.13901	0.903777	39.3601	21.003	8.9457	10.1893	541	Major facilitator superfamily MFS-1 ; Major facilitator superfamily ; MFS general substrate transporter	Oidma1_178556	178556	8e-06	8e-06	-1	2.A.1.	312	12	1.73	5	The Major Facilitator Superfamily (MFS)	>Oidma1_178556	gnl|TC-DB|O34691	2.A.1.15.7	100	PF07690;	9e-012;	MFS_1 Major Facilitator Superfamily;						sp|P30638|YOU1_CAEEL		2e-15
jgi|Oidma1|181604|	181529					MYC vs FLM UP		MYC Cd vs FLM Cd UP		1.08591	1	8.96783	3.38712e-10	4.35079	0.0002516	0.526833	0.0297026	2.83724	3.08098	25.4439	13.4047	533	Sugar transporter ; General substrate transporter ; Sugar transporter ; Major facilitator superfamily ; Sugar transporter, conserved site ; Sugar transporter, conserved site ; MFS general substrate transporter	Oidma1_181529	181529	5.7e-86	5.7e-86	-1	2.A.1.	312	12	1.73	6	The Major Facilitator Superfamily (MFS)	>Oidma1_181529	gnl|TC-DB|P49374	2.A.1.1.39	100	PF00083; PF07690;	1e-117; 5e-028;	Sugar_tr Sugar (and other) transporter; MFS_1 Major Facilitator Superfamily;						sp|P49374|HGT1_KLULA		3e-84
jgi|Oidma1|183934|	183859					MYC vs FLM UP		MYC Cd vs FLM Cd UP		1.28005	1	11.7595	0.0140353	6.98402	0.0447584	0.760229	0.896706	0.335007	0.428826	3.93951	2.99493	551	Sugar transporter ; General substrate transporter ; Sugar transporter ; Major facilitator superfamily ; Sugar transporter, conserved site ; TonB box, conserved site ; MFS general substrate transporter	Oidma1_183859	183859	7.5e-105	7.5e-105	-1	2.A.1.	312	12	1.73	6	The Major Facilitator Superfamily (MFS)	>Oidma1_183859	gnl|TC-DB|P15685	2.A.1.1.10	100	PF00083; PF07690; PF07690;	9e-075; 2e-013; 9e-010;	Sugar_tr Sugar (and other) transporter; MFS_1 Major Facilitator Superfamily; MFS_1 Major Facilitator Superfamily;						sp|P38156|MAL31_YEAST		4e-104
jgi|Oidma1|180385|	180310						MYC vs FLM DOWN			0.555594	0.0554889	0.244651	1.76144e-07	0.74747	0.0413564	1.69748	0.489556	28.4949	15.8316	6.9713	11.8337	385	Zinc/iron permease ; Zinc/iron permease, fungal and plant	Oidma1_180310	180310	5.2e-67	5.2e-67	-1	2.A.5.	19	7.58	0.88	4	The Zinc (Zn2+)-Iron (Fe2+) Permease (ZIP) Family	>Oidma1_180310	gnl|TC-DB|P32804	2.A.5.1.1	100	PF02535;	4e-073;	Zip ZIP Zinc transporter;						sp|O94639|YGC6_SCHPO		6e-69
jgi|Oidma1|125653|	125578					MYC vs FLM UP				3.7941	1	39.7104	0.0235083	6.5228	0.163327	0.623216	0.853685	0.0650451	0.246788	2.58297	1.60975	554	Tetracycline resistance protein, TetA ; Tetracycline resistance protein, TetB ; Major facilitator superfamily MFS-1 ; Major facilitator superfamily ; MFS general substrate transporter	Oidma1_125578	125578	4.5e-41	4.5e-41	-1	2.A.1.	312	12	1.73	7	The Major Facilitator Superfamily (MFS)	>Oidma1_125578	gnl|TC-DB|Q09752	2.A.1.48.3	100	PF07690; PF07690; PF07690; PF00083;	2e-042; 9e-033; 8e-010; 2e-006;	MFS_1 Major Facilitator Superfamily; MFS_1 Major Facilitator Superfamily; MFS_1 Major Facilitator Superfamily; Sugar_tr Sugar (and other) transporter;						sp|Q10072|YAN6_SCHPO		2e-52
jgi|Oidma1|180716|	180641								MYC Cd vs FLM Cd DOWN	1.18266	1	0.840738	0.191176	0.387368	1.17056e-05	0.544909	0.156639	16.8894	19.9745	14.1996	7.73747	600	Major facilitator superfamily MFS-1 ; Major facilitator superfamily ; MFS general substrate transporter	Oidma1_180641	180641	5e-70	5e-70	-1	2.A.1.	312	12	1.73	3	The Major Facilitator Superfamily (MFS)	>Oidma1_180641	gnl|TC-DB|Q07824	2.A.1.2.16	100	PF07690; PF00083;	4e-053; 2e-009;	MFS_1 Major Facilitator Superfamily; Sugar_tr Sugar (and other) transporter;						sp|Q9USN4|YJA1_SCHPO		1e-123
jgi|Oidma1|181332|	181257						MYC vs FLM DOWN		MYC Cd vs FLM Cd DOWN	1.0727	1	0.435902	1.29912e-05	0.492222	0.000490357	1.2113	0.704529	66.5235	71.36	28.9977	35.125	372	Cation efflux protein ; Cation efflux protein	Oidma1_181257	181257	9.9e-31	9.9e-31	-1	2.A.4.	21	6.86	3.38	6	The Cation Diffusion Facilitator (CDF) Family	>Oidma1_181257	gnl|TC-DB|P20107	2.A.4.2.2	100	PF01545;	8e-058;	Cation_efflux Cation efflux family;						sp|P20107|ZRC1_YEAST		5e-29
jgi|Oidma1|39698|	39623					MYC vs FLM UP				1.40995	1	7.52493	0.00809331	1.11203	0.945758	0.208363	0.0677301	0.787988	1.11102	5.92956	1.2355	512	Tetracycline resistance protein, TetB ; Major facilitator superfamily MFS-1 ; Major facilitator superfamily ; MFS general substrate transporter	Oidma1_39623	39623	1e-23	1e-23	-1	2.A.1.	312	12	1.73	7	The Major Facilitator Superfamily (MFS)	>Oidma1_39623	gnl|TC-DB|O59726	2.A.1.48.4	100	PF07690;	2e-031;	MFS_1 Major Facilitator Superfamily;						sp|P36172|YK85_YEAST		5e-24
jgi|Oidma1|71424|	71349					MYC vs FLM UP		MYC Cd vs FLM Cd UP		1.51791	1	66.5103	2.66312e-10	54.2951	1.12257e-13	1.23913	0.683015	0.241836	0.367085	16.0846	19.9309	463	Tetracycline resistance protein, TetB ; Major facilitator superfamily MFS-1 ; Major facilitator superfamily ; MFS general substrate transporter	Oidma1_71349	71349	1.5e-07	1.5e-07	-1	2.A.1.	312	12	1.73	5	The Major Facilitator Superfamily (MFS)	>Oidma1_71349	gnl|TC-DB|P53943	2.A.1.2.36	80	PF07690;	6e-037;	MFS_1 Major Facilitator Superfamily;						sp|P38227|YBP3_YEAST		2e-07
jgi|Oidma1|181965|	181890						MYC vs FLM DOWN			0.514387	0.0554889	0.375266	1.70835e-05	0.958776	0.451328	1.31422	0.817935	16.2441	8.35576	6.09586	8.0113	1463	ABC transporter-like ; ABC transporter-like ; ABC transporter, transmembrane region ; AAA+ ATPase, core ; ABC transporter-like ; ABC transporter, transmembrane region, type 1 ; ABC transporter-like ; ABC transporter, transmembrane region, type 1	Oidma1_181890	181890	9e-50	9e-50	-1	3.A.1.	876	4.31	3.92	5	The ATP-binding Cassette (ABC) Superfamily	>Oidma1_181890	gnl|TC-DB|P33527	3.A.1.208.8	100	PF00005; PF00005; PF00005; PF00664;	1e-076; 5e-043; 1e-034; 9e-024;	ABC_tran ABC transporter; ABC_tran ABC transporter; ABC_tran ABC transporter; ABC_membrane ABC transporter transmembrane region;						sp|Q5F364|MRP1_CHICK		1e-49
jgi|Oidma1|181981|	181906				MYC Cd vs MYC DOWN		MYC vs FLM DOWN		MYC Cd vs FLM Cd DOWN	1.19987	1	0.476841	0.00477232	0.17155	0.000188229	0.43167	0.000867576	46.8278	56.1873	22.3294	9.63893	559	Tetracycline resistance protein, TetB ; Major facilitator superfamily MFS-1 ; Major facilitator superfamily ; MFS general substrate transporter	Oidma1_181906	181906	3.7e-19	3.7e-19	-1	2.A.1.	312	12	1.73	6	The Major Facilitator Superfamily (MFS)	>Oidma1_181906	gnl|TC-DB|Q09752	2.A.1.48.3	100	PF07690; PF07690; PF07690;	4e-038; 3e-030; 2e-008;	MFS_1 Major Facilitator Superfamily; MFS_1 Major Facilitator Superfamily; MFS_1 Major Facilitator Superfamily;						sp|Q00357|TOXA_COCCA		5e-71
jgi|Oidma1|182954|	182879						MYC vs FLM DOWN		MYC Cd vs FLM Cd DOWN	0.717955	0.520469	0.342675	1.05439e-12	0.286949	0.00881728	0.601201	0.44824	39.1133	28.0816	13.4032	8.05798	1481	ABC transporter-like ; ABC transporter-like ; ABC transporter, transmembrane region ; AAA+ ATPase, core ; ABC transporter-like ; ABC transporter, transmembrane region, type 1 ; ABC transporter-like ; ABC transporter, transmembrane region, type 1	Oidma1_182879	182879	8.5e-56	8.5e-56	-1	3.A.1.	876	4.31	3.92	5	The ATP-binding Cassette (ABC) Superfamily	>Oidma1_182879	gnl|TC-DB|P33527	3.A.1.208.8	100	PF00005; PF00005; PF00005; PF00664;	2e-074; 7e-038; 2e-037; 2e-019;	ABC_tran ABC transporter; ABC_tran ABC transporter; ABC_tran ABC transporter; ABC_membrane ABC transporter transmembrane region;						sp|Q8CG09|MRP1_RAT		2e-55
jgi|Oidma1|118364|	118289					MYC vs FLM UP				1.20314	1	3.38072	0.0425327	2.35352	0.157101	0.837579	0.89977	2.48151	2.9856	8.38929	7.02669	544	Tetracycline resistance protein, TetB ; Major facilitator superfamily MFS-1 ; Major facilitator superfamily ; MFS general substrate transporter	Oidma1_118289	118289	4.7e-35	4.7e-35	-1	2.A.1.	312	12	1.73	7	The Major Facilitator Superfamily (MFS)	>Oidma1_118289	gnl|TC-DB|O59726	2.A.1.48.4	100	PF07690;	2e-043;	MFS_1 Major Facilitator Superfamily;						sp|Q10072|YAN6_SCHPO		4e-50
jgi|Oidma1|139840|	139765			MYC Cd vs MYC UP		MYC vs FLM UP		MYC Cd vs FLM Cd UP		0.970989	1	9.24271	0.00996439	103.617	0	10.8854	0	3.58768	3.4836	33.1599	360.96	635	TGF-beta receptor, type I/II extracellular region ; TGF-beta receptor, type I/II extracellular region ; MFS general substrate transporter	Oidma1_139765	139765	2.7e-45	2.7e-45	-1	2.A.17.	15	11.4	2.94	3	The Proton-dependent Oligopeptide Transporter (POT) Family	>Oidma1_139765	gnl|TC-DB|P46031	2.A.17.2.1	100	PF00854; PF00854; PF00854; PF00854; PF07690;	1e-039; 1e-017; 9e-006; 1e-018; 5e-013;	PTR2 POT family; PTR2 POT family; PTR2 POT family; PTR2 POT family; MFS_1 Major Facilitator Superfamily;						sp|P46030|PTR2_CANAL		1e-73
jgi|Oidma1|86042|	85967					MYC vs FLM UP		MYC Cd vs FLM Cd UP		0.901777	1	19.4735	0.0355179	5.6391	0.0055549	0.261135	0.453929	1.92766	1.73832	37.5383	9.80254	75	Ubiquitin ; Ubiquitin ; Ubiquitin ; Ubiquitin ; Ubiquitin						3.A.16					The Endoplasmic Reticular Retrotranslocon (ER-RT) Family		gnl|TC-DB|Q7KQK2	3.A.16.1.3					381	75	270	2e-30	65.3	sp|P40909|RL40_CRYNJ	281	6e-33
jgi|Oidma1|184439|	184364								MYC Cd vs FLM Cd DOWN	0.994375	1	1.01025	0.445595	0.340512	0.00715099	0.335161	0.0904893	7.17855	7.13817	7.25214	2.43063	529	Major facilitator superfamily MFS-1 ; MFS general substrate transporter	Oidma1_184364	184364	1e-23	1e-23	-1	2.A.1.	312	12	1.73	6	The Major Facilitator Superfamily (MFS)	>Oidma1_184364	gnl|TC-DB|P25621	2.A.1.14.18	100	PF07690;	6e-025;	MFS_1 Major Facilitator Superfamily;						sp|Q10097|YAOI_SCHPO		2e-28
jgi|Oidma1|185182|	185107			MYC Cd vs MYC UP			MYC vs FLM DOWN			1.00967	1	0.48312	0.000128126	1.335	0.791734	2.79	1.25016e-13	57.1704	57.723	27.6201	77.0603	569	Amino acid permease-associated region ; Amino acid/polyamine transporter I ; Amino acid permease, conserved site	Oidma1_185107	185107	1.6e-121	1.6e-121	-1	2.A.3.	77	12.13	0.83	6	The Amino Acid-Polyamine-Organocation (APC) Family	>Oidma1_185107	gnl|TC-DB|P53388	2.A.3.10.13	100	PF00324;	8e-142;	AA_permease Amino acid permease;						sp|P53388|DIP5_YEAST		8e-120
jgi|Oidma1|185784|	185709						MYC vs FLM DOWN		MYC Cd vs FLM Cd DOWN	1.13433	1	0.373599	8.25662e-06	0.34359	4.35024e-05	1.04322	0.967671	17.3213	19.6481	6.4712	6.75089	321	Nickel/cobalt transporter, high-affinity	Oidma1_185709	185709	8.4e-44	8.4e-44	-1	2.A.52.	8	6.38	1.22	4	The Ni2+-Co2+ Transporter (NiCoT) Family	>Oidma1_185709	gnl|TC-DB|P23516	2.A.52.1.1	80	PF03824;	4e-044;	NicO High-affinity nickel-transport protein;						sp|P23516|HOXN_RALEH		4e-42
jgi|Oidma1|93512|	93437	FLM Cd vs FLM UP				MYC vs FLM UP		MYC Cd vs FLM Cd UP		2.04854	7.60872e-05	50.8833	0	22.5605	2.39797e-05	0.908276	0.946605	552.847	1132.53	28130.7	25550.4	79	Ubiquitin ; Ubiquitin ; Ubiquitin ; Ubiquitin ; Ubiquitin						3.A.25					The Symbiont-specific ERAD-like Machinery (SELMA) Family		gnl|TC-DB|B7FZS1	3.A.25.1.1					381	78	362	7e-44	91.0	sp|P40909|RL40_CRYNJ	385	1e-48
jgi|Oidma1|186004|	185929						MYC vs FLM DOWN		MYC Cd vs FLM Cd DOWN	0.840437	0.83777	0.312651	0.000108373	0.37689	4.09321e-12	1.01312	0.971895	191.52	160.96	59.8788	60.6643	584	Permease for cytosine/purines, uracil, thiamine, allantoin	Oidma1_185929	185929	9.8e-87	9.8e-87	-1	2.A.39.	12	12.17	0.37	5	The Nucleobase:Cation Symporter-1 (NCS1) Family	>Oidma1_185929	gnl|TC-DB|Q04895	2.A.39.3.1	100	PF02133;	9e-088;	Transp_cyt_pur Permease for cytosine/purines;						sp|Q10279|FUR4_SCHPO		1e-86
jgi|Oidma1|186084|	186009								MYC Cd vs FLM Cd DOWN	0.548897	0.673281	0.465782	0.0801772	0.362854	0.00210623	0.427602	0.239071	41.2524	22.6433	19.2146	8.21622	407	Mitochondrial substrate carrier ; Mitochondrial substrate carrier ; Mitochondrial substrate carrier	Oidma1_186009	186009	2.9e-23	2.9e-23	-1	2.A.29.	72	4.42	1.35	3	The Mitochondrial Carrier (MC) Family	>Oidma1_186009	gnl|TC-DB|Q06497	2.A.29.17.1	100	PF00153; PF00153; PF00153; PF00153;	8e-046; 2e-017; 2e-014; 3e-015;	Mito_carr Mitochondrial carrier protein; Mito_carr Mitochondrial carrier protein; Mito_carr Mitochondrial carrier protein; Mito_carr Mitochondrial carrier protein;						sp|Q06497|ANT1_YEAST		1e-21
jgi|Oidma1|186197|	186122						MYC vs FLM DOWN		MYC Cd vs FLM Cd DOWN	0.633194	0.515856	0.189372	0.000940538	0.468635	1.53631e-21	1.56695	0.412467	164.58	104.211	31.1667	48.8369	308	Mitochondrial substrate carrier ; Mitochondrial substrate carrier ; Mitochondrial substrate carrier	Oidma1_186122	186122	1e-91	1e-91	-1	2.A.29.	72	4.42	1.35	3	The Mitochondrial Carrier (MC) Family	>Oidma1_186122	gnl|TC-DB|NP_010973	2.A.29.4.4	100	PF00153; PF00153; PF00153; PF00153;	1e-055; 3e-023; 1e-023; 4e-010;	Mito_carr Mitochondrial carrier protein; Mito_carr Mitochondrial carrier protein; Mito_carr Mitochondrial carrier protein; Mito_carr Mitochondrial carrier protein;						sp|Q9P7V8|MPCP_SCHPO		1e-91
jgi|Oidma1|187891|	187816								MYC Cd vs FLM Cd DOWN	1.60296	0.00187112	0.601736	8.34943e-05	0.4173	1.6162e-45	1.11164	0.902246	125.047	200.446	75.2455	83.6461	76	ATPase, V0 complex, subunit E						3.A.2					The H+- or Na+-translocating F-type, V-type and A-type ATPase (F-ATPase) Superfamily		gnl|TC-DB|Q3E7B6	3.A.2.2.3					73	62	154	1e-15	48.4	sp|Q75EU0|VA0E_ASHGO	171	8e-17
jgi|Oidma1|148273|	148198					MYC vs FLM UP		MYC Cd vs FLM Cd UP		0.560668	0.658997	11.0802	0	21.7898	4.76688e-06	1.10258	0.873667	3678.63	2062.49	40760	44941.3	306	Ubiquitin ; Ubiquitin ; Ubiquitin ; Ubiquitin ; Ubiquitin						3.A.25					The Symbiont-specific ERAD-like Machinery (SELMA) Family		gnl|TC-DB|B7FZS1	3.A.25.1.1					381	304	1488	0.0	96.1	sp|P0CG75|UBI4P_KLULA	1544	0.0
jgi|Oidma1|189135|	189060						MYC vs FLM DOWN			0.766701	0.0243047	0.385067	1.06465e-10	0.547198	3.90322e-09	1.08952	0.985739	69.6816	53.4249	26.8321	29.234	529	Sugar transporter ; General substrate transporter ; Sugar transporter ; Major facilitator superfamily ; Sugar transporter, conserved site ; Sugar transporter, conserved site ; MFS general substrate transporter	Oidma1_189060	189060	1.6e-35	1.6e-35	-1	2.A.1.	312	12	1.73	6	The Major Facilitator Superfamily (MFS)	>Oidma1_189060	gnl|TC-DB|Q9C757	2.A.1.1.63	100	PF00083; PF00083; PF00083; PF07690;	5e-110; 2e-079; 1e-029; 4e-026;	Sugar_tr Sugar (and other) transporter; Sugar_tr Sugar (and other) transporter; Sugar_tr Sugar (and other) transporter; MFS_1 Major Facilitator Superfamily;						sp|P87110|ITR2_SCHPO		5e-40
jgi|Oidma1|189319|	189244						MYC vs FLM DOWN			1.37395	0.663594	0.475472	0.000586589	0.501605	6.86915e-11	1.44947	0.707271	42.8184	58.8305	20.359	29.5097	666	Sugar transporter ; General substrate transporter ; Sugar transporter ; Major facilitator superfamily ; Sugar transporter, conserved site ; MFS general substrate transporter	Oidma1_189244	189244	7.2e-49	7.2e-49	-1	2.A.1.	312	12	1.73	3	The Major Facilitator Superfamily (MFS)	>Oidma1_189244	gnl|TC-DB|Q8NJ22	2.A.1.1.33	100	PF00083; PF07690;	7e-095; 1e-011;	Sugar_tr Sugar (and other) transporter; MFS_1 Major Facilitator Superfamily;						sp|P38695|HXT5_YEAST		4e-40
jgi|Oidma1|190639|	190564						MYC vs FLM DOWN		MYC Cd vs FLM Cd DOWN	1.37595	0.800352	0.447838	5.17809e-08	0.423961	0.000156249	1.30259	0.834464	31.6329	43.5254	14.1664	18.4531	157							2.A.7					The Drug/Metabolite Transporter (DMT) Superfamily		gnl|TC-DB|E3REF2	2.A.7.32.4					182	181	458	3e-59	51.9	sp|Q54ZG7|TM234_DICDI	197	7e-19
jgi|Oidma1|191357|	191282						MYC vs FLM DOWN		MYC Cd vs FLM Cd DOWN	0.842524	0.978424	0.479044	0.00759459	0.461245	0.00174073	0.81122	0.798615	41.3151	34.809	19.7918	16.0555	580	Tetracycline resistance protein, TetA ; Major facilitator superfamily MFS-1 ; Major facilitator superfamily ; MFS general substrate transporter	Oidma1_191282	191282	1.1e-05	1.1e-05	-1	2.A.1.	312	12	1.73	4	The Major Facilitator Superfamily (MFS)	>Oidma1_191282	gnl|TC-DB|P02982	2.A.1.2.4	100	PF07690;	1e-032;	MFS_1 Major Facilitator Superfamily;						sp|P25351|YCR3_YEAST		1e-20
jgi|Oidma1|191813|	191738						MYC vs FLM DOWN			0.858259	0.512687	0.474389	2.96111e-08	0.609575	1.03271e-07	1.10284	0.788553	68.5364	58.822	32.5129	35.8565	547	Protein of unknown function DUF250 ; Short-chain dehydrogenase/reductase SDR	Oidma1_191738	191738	0.00478	0.00478	-1	2.A.7.	74	8.31	2.38	3	The Drug/Metabolite Transporter (DMT) Superfamily	>Oidma1_191738	gnl|TC-DB|P49133	2.A.7.9.1	40	PF03151;	5e-043;	TPT Triose-phosphate Transporter family;						sp|Q10354|YDB1_SCHPO		1e-51
jgi|Oidma1|192525|	192450						MYC vs FLM DOWN		MYC Cd vs FLM Cd DOWN	0.663817	0.805168	0.199025	0.00692779	0.415268	0.00019804	1.38506	0.0191241	329.638	218.82	65.6063	90.8688	823	AAA ATPase, core ; AAA ATPase VAT, N-terminal ; AAA+ ATPase, core ; AAA ATPase, CDC48 ; TonB box, conserved site ; AAA ATPase, conserved site ; Aspartate decarboxylase-like fold						3.A.16					The Endoplasmic Reticular Retrotranslocon (ER-RT) Family		gnl|TC-DB|P25694	3.A.16.1.2					835	836	3304	0.0	76.0	sp|Q5AWS6|CDC48_EMENI	3799	0.0
jgi|Oidma1|192749|	192674						MYC vs FLM DOWN		MYC Cd vs FLM Cd DOWN	0.818607	0.562742	0.485222	2.61636e-06	0.470881	8.92149e-05	0.794413	0.828273	25.2874	20.7005	12.27	9.74746	1555	ABC transporter-like ; ABC transporter-like ; ABC transporter, transmembrane region ; AAA+ ATPase, core ; ABC transporter-like ; ABC transporter, transmembrane region, type 1 ; ABC transporter-like ; ABC transporter, transmembrane region, type 1	Oidma1_192674	192674	6.5e-115	6.5e-115	-1	3.A.1.	876	4.31	3.92	5	The ATP-binding Cassette (ABC) Superfamily	>Oidma1_192674	gnl|TC-DB|P32386	3.A.1.208.12	100	PF00005; PF00005; PF00005; PF00664; PF00664; PF00664;	2e-079; 7e-027; 2e-053; 7e-029; 5e-016; 4e-013;	ABC_tran ABC transporter; ABC_tran ABC transporter; ABC_tran ABC transporter; ABC_membrane ABC transporter transmembrane region; ABC_membrane ABC transporter transmembrane region; ABC_membrane ABC transporter transmembrane region;						sp|P38735|YHD5_YEAST		2e-172
jgi|Oidma1|193088|	193013						MYC vs FLM DOWN			0.538644	0.246164	0.301558	3.76036e-09	0.363974	0.101549	0.650132	0.656486	29.5031	15.8917	8.89689	5.78415	1426	ABC transporter-like ; ABC transporter-like ; ABC transporter, transmembrane region ; AAA+ ATPase, core ; ABC transporter-like ; ABC transporter, transmembrane region, type 1 ; ABC transporter-like ; ABC transporter, transmembrane region, type 1	Oidma1_193013	193013	5.4e-100	5.4e-100	-1	3.A.1.	876	4.31	3.92	6	The ATP-binding Cassette (ABC) Superfamily	>Oidma1_193013	gnl|TC-DB|Q6J0P5	3.A.1.208.14	100	PF00005; PF00005; PF00005; PF00664; PF00664; PF00664;	5e-072; 1e-038; 3e-034; 1e-018; 5e-007; 2e-012;	ABC_tran ABC transporter; ABC_tran ABC transporter; ABC_tran ABC transporter; ABC_membrane ABC transporter transmembrane region; ABC_membrane ABC transporter transmembrane region; ABC_membrane ABC transporter transmembrane region;						sp|Q9LYS2|MRP14_ARATH		1e-94
jgi|Oidma1|193310|	193235						MYC vs FLM DOWN		MYC Cd vs FLM Cd DOWN	1.21994	1	0.25916	0.000489168	0.140497	5.215e-54	0.661362	0.217975	101.862	124.265	26.3985	17.4589	448	Protein of unknown function DUF895, eukaryotic ; MFS general substrate transporter	Oidma1_193235	193235	6e-118	6e-118	-1	2.A.1.	312	12	1.73	7	The Major Facilitator Superfamily (MFS)	>Oidma1_193235	gnl|TC-DB|Q5A7S4	2.A.1.58.1	20									sp|Q6PB15|MFS11_XENLA		0.0003
jgi|Oidma1|193763|	193688						MYC vs FLM DOWN			0.790286	0.292378	0.430924	3.60325e-08	0.550316	3.64817e-08	1.00924	0.993864	63.9557	50.5433	27.56	27.8148	751	Amino acid transporter, transmembrane	Oidma1_193688	193688	2.2e-126	2.2e-126	-1	2.A.18.	26	10.73	0.86	0	The Amino Acid/Auxin Permease (AAAP) Family	>Oidma1_193688	gnl|TC-DB|P36062	2.A.18.7.1	100	PF01490;	1e-102;	Aa_trans Transmembrane amino acid transporter protein;						sp|Q10074|YAN9_SCHPO		6e-134
jgi|Oidma1|194223|	194148								MYC Cd vs FLM Cd DOWN	1.37862	0.475585	0.507425	1.04249e-05	0.421907	4.15068e-13	1.14628	0.872754	205.752	283.655	104.404	119.676	134	Protein of unknown function UPF0041						2.A.105					The Mitochondrial Pyruvate Carrier (MPC) Family		gnl|TC-DB|P53157	2.A.105.1.1					130	83	324	8e-40	66.3	sp|P53157|MPC1_YEAST	324	2e-38
jgi|Oidma1|195258|	195183						MYC vs FLM DOWN			0.815135	0.115182	0.479102	3.10066e-07	0.763844	5.68536e-09	1.29959	0.784631	142.704	116.323	68.3696	88.8523	513	ATPase, F1/V1/A1 complex, alpha/beta subunit, nucleotide-binding ; ATPase, F1/V1/A1 complex, alpha/beta subunit, C-terminal ; ATPase, F1/V1/A1 complex, alpha/beta subunit, N-terminal ; ATPase, V1 complex, subunit B ; ATPase, F1/V1/A1 complex, alpha/beta subunit, nucleotide-binding ; ATPase, F1/V1/A1 complex, alpha/beta subunit, C-terminal	Oidma1_195183	195183	3.6e-239	3.6e-239	-1	3.A.2.	74	1.3	2.25	0	The H+- or Na+-translocating F-type, V-type and A-type ATPase (F-ATPase) Superfamily	>Oidma1_195183	gnl|TC-DB|P16140	3.A.2.2.3	100									sp|P11593|VATB_NEUCR		9e-261
jgi|Oidma1|196175|	196100						MYC vs FLM DOWN		MYC Cd vs FLM Cd DOWN	1.0072	1	0.339366	8.43132e-06	0.344257	7.37468e-20	1.02172	0.991178	67.4888	67.9746	22.9034	23.4008	522	Permease for cytosine/purines, uracil, thiamine, allantoin	Oidma1_196100	196100	1.5e-160	1.5e-160	-1	2.A.39.	12	12.17	0.37	4	The Nucleobase:Cation Symporter-1 (NCS1) Family	>Oidma1_196100	gnl|TC-DB|ACA81792	2.A.39.2.4	80	PF02133;	2e-031;	Transp_cyt_pur Permease for cytosine/purines;						sp|P17064|FCY2_YEAST		5e-108
jgi|Oidma1|196493|	196418						MYC vs FLM DOWN			0.933802	0.527592	0.406484	1.14273e-10	0.547282	2.01349e-23	1.25725	0.840046	155.191	144.917	63.0826	79.3107	461	AAA ATPase, core ; AAA+ ATPase, core ; 26S proteasome subunit P45 ; AAA ATPase, conserved site						3.A.25					The Symbiont-specific ERAD-like Machinery (SELMA) Family		gnl|TC-DB|P46468	3.A.25.2.1					1229	260	494	3e-54	39.6	sp|P33297|PRS6A_YEAST	1752	0.0
jgi|Oidma1|196871|	196796						MYC vs FLM DOWN			0.582033	0.390062	0.490521	0.00772602	0.899555	0.442867	1.06738	0.957978	12.6707	7.37478	6.21525	6.63402	1499	ABC transporter-like ; ABC transporter-like ; ABC-2 type transporter ; CDR ABC transporter ; AAA+ ATPase, core ; ABC transporter-like ; ABC transporter-like	Oidma1_196796	196796	3.1e-292	3.1e-292	-1	3.A.1.	876	4.31	3.92	1	The ATP-binding Cassette (ABC) Superfamily	>Oidma1_196796	gnl|TC-DB|Q8X0Z3	3.A.1.205.6	100	PF01061; PF01061; PF01061; PF00005; PF00005; PF00005;	5e-127; 3e-070; 8e-058; 2e-043; 4e-023; 2e-021;	ABC2_membrane ABC-2 type transporter; ABC2_membrane ABC-2 type transporter; ABC2_membrane ABC-2 type transporter; ABC_tran ABC transporter; ABC_tran ABC transporter; ABC_tran ABC transporter;						sp|P41820|BFR1_SCHPO		5e-276
jgi|Oidma1|196876|	196801						MYC vs FLM DOWN		MYC Cd vs FLM Cd DOWN	1.53675	0.131937	0.474875	2.67053e-06	0.295986	1.71555e-21	0.957845	0.982541	43.3963	66.6893	20.6078	19.7391	151							1.A.67					The Membrane Mg2+ Transporter (MMgT) Family		gnl|TC-DB|E4ZMW5	1.A.67.1.5					137	155	194	7e-20	31.6	No hits found	-	-
jgi|Oidma1|197392|	197317						MYC vs FLM DOWN		MYC Cd vs FLM Cd DOWN	0.95914	0.973049	0.475558	1.10706e-06	0.408809	4.50162e-18	0.824516	0.492526	76.4549	73.331	36.3588	29.9784	272	Ubiquitin-conjugating enzyme, E2 ; Ubiquitin-conjugating enzyme, E2 ; Ubiquitin-conjugating enzyme, E2 ; Ubiquitin-conjugating enzyme, E2 ; Ubiquitin-conjugating enzyme/RWD-like						3.A.16					The Endoplasmic Reticular Retrotranslocon (ER-RT) Family		gnl|TC-DB|E7NGV2	3.A.16.1.2					250	266	527	6e-67	39.8	sp|Q6CMG6|UBC6_KLULA	543	8e-68
jgi|Oidma1|197654|	197579						MYC vs FLM DOWN		MYC Cd vs FLM Cd DOWN	0.811615	0.350303	0.331561	2.42111e-10	0.358004	5.89235e-18	0.876343	0.816777	78.4846	63.6993	26.0224	22.8046	483	Amino acid permease-associated region ; Amino acid/polyamine transporter I ; Amino acid permease, conserved site	Oidma1_197579	197579	3.2e-64	3.2e-64	-1	2.A.3.	77	12.13	0.83	6	The Amino Acid-Polyamine-Organocation (APC) Family	>Oidma1_197579	gnl|TC-DB|Q9Y860	2.A.3.4.2	100	PF00324;	3e-006;	AA_permease Amino acid permease;						sp|P19807|HNM1_YEAST		2e-62
jgi|Oidma1|199295|	199220							MYC Cd vs FLM Cd UP		1.30718	0.81988	1.41631	0.93461	2.01612	5.52516e-05	1.86076	2.3717e-07	33.22	43.4244	47.05	87.5487	609	AMP-dependent synthetase and ligase ; AMP-dependent synthetase and ligase ; AMP-dependent synthetase and ligase						4.C.1					The Fatty Acid Transporter (FAT) Family		gnl|TC-DB|O14975	4.C.1.1.5					620	563	776	5e-95	33.4	sp|Q8J0E9|CEFD1_ACRCH	1229	2e-161
jgi|Oidma1|199379|	199304						MYC vs FLM DOWN		MYC Cd vs FLM Cd DOWN	1.01926	1	0.478459	7.91333e-08	0.372804	2.08029e-09	0.794181	0.792213	33.6384	34.2862	16.0946	12.782	375	Zinc/iron permease	Oidma1_199304	199304	2.1e-44	2.1e-44	-1	2.A.5.	19	7.58	0.88	4	The Zinc (Zn2+)-Iron (Fe2+) Permease (ZIP) Family	>Oidma1_199304	gnl|TC-DB|Q92504	2.A.5.4.3	100	PF02535;	4e-060;	Zip ZIP Zinc transporter;						sp|Q5TJF6|S39A7_CANFA		2e-43
jgi|Oidma1|200538|	200463								MYC Cd vs FLM Cd DOWN	1.08629	1	0.507996	0.00123679	0.492104	4.43863e-06	1.0523	0.926914	27.5364	29.9125	13.9884	14.72	308	Mrp, conserved site						3.A.1					The ATP-binding Cassette (ABC) Superfamily		gnl|TC-DB|A0L4L0	3.A.1.132.3					339	197	351	4e-39	39.1	sp|Q8X0F1|CFD1_NEUCR	1158	7e-160
jgi|Oidma1|201242|	201167								MYC Cd vs FLM Cd DOWN	0.971187	1	0.710929	0.0508454	0.463044	0.00854202	0.632556	0.680355	10.1198	9.82821	7.19445	4.55089	503	Tetracycline resistance protein, TetA ; Major facilitator superfamily MFS-1 ; Major facilitator superfamily ; MFS general substrate transporter	Oidma1_201167	201167	2.1e-34	2.1e-34	-1	2.A.1.	312	12	1.73	8	The Major Facilitator Superfamily (MFS)	>Oidma1_201167	gnl|TC-DB|O69070	2.A.1.3.29	100	PF07690;	3e-041;	MFS_1 Major Facilitator Superfamily;						sp|Q00357|TOXA_COCCA		3e-76
jgi|Oidma1|202493|	202418								MYC Cd vs FLM Cd DOWN	1.32052	1	2.5249	0.290141	0.347784	0.000425451	0.181891	0.314896	11.3111	14.9365	28.5593	5.19468	355	Protein kinase, core ; MAP kinase, p38 ; Serine/threonine protein kinase-related ; Tyrosine protein kinase ; Serine/threonine protein kinase ; Protein kinase, core ; Protein kinase ATP binding, conserved site ; Serine/threonine protein kinase, active site ; MAP kinase, conserved site ; Protein kinase-like						1.I.1					The Eukaryotic Nuclear Pore Complex (E-NPC) Family		gnl|TC-DB|P06493	1.I.1.1.3					297	288	493	5e-60	37.5	sp|Q75Q66|HOG1_COLOR	1563	0.0
jgi|Oidma1|202660|	202585							MYC Cd vs FLM Cd UP		1.05176	1	3.97837	0.141527	4.64876	6.25583e-14	1.22899	0.888211	10.9182	11.4833	43.4364	53.3831	438	Major facilitator superfamily MFS-1 ; MFS general substrate transporter	Oidma1_202585	202585	5.1e-29	5.1e-29	-1	2.A.1.	312	12	1.73	7	The Major Facilitator Superfamily (MFS)	>Oidma1_202585	gnl|TC-DB|P53322	2.A.1.14.11	100	PF07690;	7e-024;	MFS_1 Major Facilitator Superfamily;						sp|P53322|TNA1_YEAST		2e-27
jgi|Oidma1|203043|	202968								MYC Cd vs FLM Cd DOWN	1.27436	1	0.540705	0.0587343	0.488959	1.04367e-08	1.15241	0.937627	33.1822	42.2861	17.9418	20.6762	462	Major facilitator superfamily MFS-1 ; Major facilitator superfamily ; MFS general substrate transporter	Oidma1_202968	202968	1e-11	1e-11	-1	2.A.1.	312	12	1.73	6	The Major Facilitator Superfamily (MFS)	>Oidma1_202968	gnl|TC-DB|Q91Y77	2.A.1.13.2	40	PF07690;	1e-018;	MFS_1 Major Facilitator Superfamily;						sp|P53918|ESBP6_YEAST		5e-21
jgi|Oidma1|203133|	203058						MYC vs FLM DOWN			0.757136	0.0159385	0.433258	2.78363e-18	0.585813	3.08446e-08	1.02373	0.986312	71.2977	53.9821	30.8903	31.6234	550	LETM1-like						2.A.97					The Mitochondrial Inner Membrane K+/H+ and Ca2+/H+ Exchanger (LetM1) Family		gnl|TC-DB|Q06493	2.A.97.1.4					454	342	834	2e-106	48.2	sp|O13920|MDM28_SCHPO	1005	3e-130
jgi|Oidma1|203828|	203753						MYC vs FLM DOWN		MYC Cd vs FLM Cd DOWN	0.676102	0.235843	0.360122	0.000146914	0.464359	1.62329e-18	0.871798	0.878076	130.369	88.1428	46.9489	40.9299	1335	ABC transporter-like ; ABC transporter-like ; ABC-2 type transporter ; AAA+ ATPase, core ; ABC transporter-like ; ABC transporter-like	Oidma1_203753	203753	5.4e-62	5.4e-62	-1	3.A.1.	876	4.31	3.92	2	The ATP-binding Cassette (ABC) Superfamily	>Oidma1_203753	gnl|TC-DB|P10090	3.A.1.204.1	100	PF00005; PF00005; PF00005; PF01061; PF01061; PF01061;	7e-084; 2e-043; 2e-041; 2e-053; 7e-033; 1e-021;	ABC_tran ABC transporter; ABC_tran ABC transporter; ABC_tran ABC transporter; ABC2_membrane ABC-2 type transporter; ABC2_membrane ABC-2 type transporter; ABC2_membrane ABC-2 type transporter;						sp|Q08234|YO075_YEAST		1e-97
jgi|Oidma1|204687|	204612						MYC vs FLM DOWN		MYC Cd vs FLM Cd DOWN	2.37898	0.195331	0.382992	0.000205696	0.112678	2.34759e-05	0.69991	0.318159	91.8842	218.591	35.1909	24.6305	340	Formate/nitrite transporter ; Formate/nitrite transporter	Oidma1_204612	204612	2.5e-54	2.5e-54	-1	2.A.44.	3	6.67	0.94	7	The Formate-Nitrite Transporter (FNT) Family	>Oidma1_204612	gnl|TC-DB|P35839	2.A.44.2.1	60	PF01226;	3e-121;	Form_Nir_trans Formate/nitrite transporter;						sp|P35839|FDHC_METFO		1e-52
jgi|Oidma1|204911|	204836						MYC vs FLM DOWN		MYC Cd vs FLM Cd DOWN	0.885556	0.98364	0.346813	4.86807e-06	0.284974	0.000146647	0.727654	0.564847	66.2608	58.6777	22.9801	16.7216	244	Carbonic anhydrase ; Carbonic anhydrase						2.A.53					The Sulfate Permease (SulP) Family		gnl|TC-DB|Q8F8H7	2.A.53.3.8					750	193	351	6e-38	38.3	sp|Q5BCC5|CAN_EMENI	476	2e-58
jgi|Oidma1|205771|	205696						MYC vs FLM DOWN		MYC Cd vs FLM Cd DOWN	0.889166	0.91637	0.426478	0.000133936	0.477009	6.62503e-10	0.994518	0.988572	52.9764	47.1048	22.5933	22.4694	405	Mitochondrial substrate carrier ; Mitochondrial substrate carrier ; Mitochondrial substrate carrier	Oidma1_205696	205696	5.7e-11	5.7e-11	-1	2.A.29.	72	4.42	1.35	2	The Mitochondrial Carrier (MC) Family	>Oidma1_205696	gnl|TC-DB|O43772	2.A.29.8.3	100	PF00153; PF00153; PF00153; PF00153;	2e-076; 6e-026; 2e-024; 2e-027;	Mito_carr Mitochondrial carrier protein; Mito_carr Mitochondrial carrier protein; Mito_carr Mitochondrial carrier protein; Mito_carr Mitochondrial carrier protein;						sp|Q9BZJ4|S2539_HUMAN		2e-28
jgi|Oidma1|206441|	206366								MYC Cd vs FLM Cd DOWN	1.3505	0.756695	0.611937	0.000418682	0.440745	2.57603e-17	0.972688	1	70.9985	95.8832	43.4466	42.26	480	Major facilitator superfamily MFS-1 ; Major facilitator superfamily ; MFS general substrate transporter	Oidma1_206366	206366	1e-06	1e-06	-1	2.A.1.	312	12	1.73	6	The Major Facilitator Superfamily (MFS)	>Oidma1_206366	gnl|TC-DB|Q43650	2.A.1.9.3	100	PF07690;	2e-017;	MFS_1 Major Facilitator Superfamily;						sp|P57648|Y588_BUCAI		1e-06
jgi|Oidma1|206504|	206429								MYC Cd vs FLM Cd DOWN	1.36534	0.995855	0.61164	0.122001	0.222914	4.10774e-30	0.497601	0.518655	1270.05	1734.05	776.816	386.544	613	Amino acid transporter, transmembrane	Oidma1_206429	206429	0.027	0.027	-1	2.A.18.	26	10.73	0.86	3	The Amino Acid/Auxin Permease (AAAP) Family	>Oidma1_206429	gnl|TC-DB|P38680	2.A.18.4.1	20	PF01490; PF01490;	5e-017; 3e-011;	Aa_trans Transmembrane amino acid transporter protein; Aa_trans Transmembrane amino acid transporter protein;
jgi|Oidma1|206526|	206451						MYC vs FLM DOWN		MYC Cd vs FLM Cd DOWN	1.08289	1	0.415617	0.0141569	0.324904	3.33122e-20	0.846536	0.666811	60.6785	65.708	25.2191	21.3488	580	Major facilitator superfamily MFS-1 ; Major facilitator superfamily ; MFS general substrate transporter	Oidma1_206451	206451	1.5e-23	1.5e-23	-1	2.A.1.	312	12	1.73	6	The Major Facilitator Superfamily (MFS)	>Oidma1_206451	gnl|TC-DB|O51919	2.A.1.3.24	100	PF07690;	2e-041;	MFS_1 Major Facilitator Superfamily;						sp|Q00357|TOXA_COCCA		9e-81
jgi|Oidma1|21680|	21605					MYC vs FLM UP		MYC Cd vs FLM Cd UP		1.0743	1	24.9434	0.00301217	9.16565	2.4471e-05	0.394761	0.400342	53.1332	57.0811	1325.32	523.185	132	Ubiquitin-conjugating enzyme, E2 ; Ubiquitin-conjugating enzyme, E2 ; Ubiquitin-conjugating enzyme, E2 ; Ubiquitin-conjugating enzyme, E2 ; Ubiquitin-conjugating enzyme, E2 ; Ubiquitin-conjugating enzyme/RWD-like						3.A.20					The Peroxisomal Protein Importer (PPI) Family		gnl|TC-DB|P62837	3.A.20.1.1					147	112	236	2e-26	39.3	sp|Q6C9W0|UBC12_YARLI	510	4e-66
[truncated: 8 more columns]
